# Supplementary material for: Extracellular vesicle-derived miR-144 as a novel mechanism for chronic intermittent hypoxia-induced endothelial dysfunction
Source: PubMed Central journal article supplement (PMC9169375; doi:10.7150/thno.69035), 2022-05-16
Supplement: thnov12p4237s1.pdf [file thnov12p4237s1.pdf]

# Extracellular vesicle-derived miR-144 as a novel mechanism for chronic intermittent hypoxia-induced endothelial dysfunction

Huina Zhang<sup>1,\*</sup>, Lu Peng<sup>1</sup>, Yifan Wang<sup>2</sup>, Wen Zhao<sup>1</sup>, Wayne Bond Lau<sup>3</sup>, Yajing Wang<sup>3</sup>, Yu Li<sup>1</sup>, Yunhui Du<sup>1</sup>, Linyi Li<sup>1</sup>, Yu Huang<sup>2</sup>, Shaoping Nie<sup>4</sup>, Yanwen Qin<sup>1</sup>, Xinliang Ma<sup>3</sup>, Yongxiang Wei<sup>5</sup>

<sup>1</sup>Beijing An Zhen Hospital, Capital Medical University, Beijing Institute of Heart Lung and Blood Vessel Disease, Beijing, 100029, China;

<sup>2</sup>Department of Biomedical Sciences, City University of Hong Kong, Hong Kong, 508057, China;

<sup>3</sup>Department of Emergency Medicine, Thomas Jefferson University, Philadelphia, Pa, PA19107, USA;

<sup>4</sup>Department of Emergency, Beijing An Zhen Hospital, Capital Medical University, Beijing, 100029, China;

<sup>5</sup>Department of Otolaryngology, Head and Neck Surgery, Capital Institute of Pediatrics, Beijing, 100020, China;

**Short title:** Extracellular vesicle and vascular function

Huina Zhang, Beijing An Zhen Hospital, Capital Medical University, Beijing Institute of Heart Lung and Blood Vessel Disease, No. 2 Anzhen Road, Beijing, 100029, China, Tel.: +86-10-64456509, E-mail: whinnerzhn@mail.ccmu.edu.cn

## Supplementary Materials and Methods

### Mice

All animal experiments were approved by Capital Medical University Animal Experimentation Ethics Committee, and in compliance with the National Institutes of Health Guidelines on the Use of Laboratory Animals. C57BL/6 mice were purchased from Beijing Vital River Laboratory Animal Technology Co. Twelve-week-old male mice were used. Unrestrained, freely moving mice were individually housed in chambers and received CIH treatment with fractional oxygen concentration cycled between 5% and 21% every 3 min, 8-10 h during the daytime for 15 or 30 days using a BioSpherix OxyCycler A84 system (BioSpherix, Redfield, NY, USA). Control mice were maintained in normoxic conditions for the same duration. Re-Nor post-CIH-treated mice were kept under normoxic conditions for 15 days after 30-day CIH treatment. For euthanasia, C57BL/6 mice were anesthetized with 5% isoflurane followed by terminal cardiac bleed before EV isolation, artery dissection and biochemical parameter measurement. Diastolic (DBP) and systolic (SBP) blood pressures were measured by tail-cuff plethysmography (BP-2000; Visitech Systems, Apex, North Carolina, USA).

### Clinical Samples

The study design was approved by the Medical Ethics Committee of Beijing Anzhen Hospital (2017005) and conformed to the principles outlined in the Declaration of Helsinki. The research protocols were performed in accordance with the Board of Ethics at Beijing Anzhen Hospital. Written informed consent was obtained from all participants. All the subjects enrolled in this study were attending the department of Otolaryngology-Head and Neck Surgery, Beijing Anzhen Hospital, Capital Medical University. All clinical samples and clinical information were collected at Beijing Anzhen Hospital. All patients (aged 42–67 years) were male and underwent baseline anthropometric and blood pressure assessments, as well as overnight polysomnography detection, which was interpreted using standard approaches. All fasting blood samples for erythrocyte-derived EV (E-EV) purification were collected with standard EDTA anticoagulation. The inclusion criteria for the OSA group were: participants polysomnographically diagnosed with moderate or severe OSA (apnea-hypopnea index (AHI)  $\geq 15$ /h) (n=6). The exclusion criteria for the OSA group were: patients with hyperglycemia, cancer and infection, chronic obstructive pulmonary disease, chronic bronchitis, restrictive lung diseases, respiratory failure, aortic coarctation, Cushing syndrome, pheochromocytoma, primary aldosteronism, renal parenchymal disease, renovascular hypertension, thyroid disorders, stroke, coronary heart disease, and those who could not provide a complete medical history. The inclusion criterion for the non-OSA group was: AHI < 5/h (n=6). All participants were male. The exclusion criteria for the non-OSA group were: subjects with hyperglycemia, cancer and infection, chronic obstructive pulmonary disease, chronic bronchitis, restrictive lung diseases, respiratory failure, aortic coarctation, Cushing syndrome, pheochromocytoma, primary aldosteronism, renal parenchymal disease, renovascular hypertension, thyroid disorders, stroke, coronary heart disease, and those who could not provide a complete medical history. Detailed patient characteristics are presented in Table S5.

### Cells and Tissues

Cell culture was carried out as previously described[1]. H5V endothelial cells (a kind gift from Prof. Yu Huang, Chinese University of Hong Kong, China), 293A cells, and murine erythroleukemia (MEL) cells were cultured in DMEM supplemented with 10% EV-free FBS (Exo-FBS™ EVs-depleted FBS, System Biosciences, USA), 100 IU/mL penicillin, and 100  $\mu$ g/mL streptomycin. HUVECs were cultured in Endothelial Cell Medium (ScienCell Research Labs, USA) and 10% EV-free FBS. Mouse aortic rings (2 mm in length) were dissected in sterile PBS and incubated in DMEM (Gibco, USA) with or without EVs, Tempol (100  $\mu$ M, Sigma, USA), Tiron (1 mM, Sigma, USA), DETCA (0.1 mM, Sigma, USA), or Oltipraz (100  $\mu$ M, Sigma, USA). For intermittent hypoxia treatment, H5V cells, MEL cells, and aortic rings were exposed to an intermittent hypoxia generating system (Oxycycler model C42; Biospherix, Redfield, NY, USA) with the fractional ambient oxygen concentration cycling between 5%–21% per hour for the indicated time. For continuous hypoxia treatment, MEL cells were under the treatment of constant 5% oxygen concentration for the indicated time (Oxycycler model C42; Biospherix, Redfield, NY, USA). Prolyl hydroxylases (PHD) inhibitor dimethyloxalylglycine (DMOG, MCE, China) was used as HIF-1 $\alpha$  stabilizer to mimic the hypoxia status. The transcriptional inhibitor actinomycin D (MCE, China) was used to inhibit the expression of endogenous miRNA in recipient endothelial cells.

### Microarray Analysis

RNA from aortas or from HUVECs was isolated using Trizol (Thermo Fisher Scientific, USA). Total RNA was quantified using a NanoDrop ND-2000 (Thermo Scientific, USA). RNA integrity was assessed using a Bioanalyzer 2100 (Agilent Technologies, Chandler, Arizona, USA). Sample labeling, microarray hybridization, and washing were performed according to the manufacturer's standard protocols. Genespring (version 13.1, Agilent Technologies, USA) was used to complete a basic analysis of the raw data. Raw data were normalized by the quantile algorithm. Probes possessing "P" flags in all conditions were selected for further analysis. Differentially expressed genes were then identified according to

fold change and P values calculated by the t-test. The threshold for up- and down-regulated genes was a fold change equal to or exceeding two, and a P value  $\leq 0.05$ . Afterwards, GO analysis and KEGG analysis were applied to determine the roles of differentially expressed mRNAs. Hierarchical Clustering displayed distinguishable gene expression patterns among samples. Genes with overlapping differential expression under various conditions were identified using Venn diagrams.

### **EV Isolation from Serum and Red Blood Cells**

S-EV isolation was carried out as previously described [1]. Blood from mice was clotted for 1 h at room temperature without anticoagulation, and centrifuged at 1,200×g for 10 min to obtain serum. Thereafter, the serum was centrifuged at 3,000×g for 10 min at 4°C. The supernatant was diluted in sterile PBS in a 1:1 ratio and centrifuged again at 14,000×g for 30 min followed by 2-h ultracentrifugation at 110,000×g (Beckman Coulter, Optima MAX-XP, USA) at 4°C. The EV pellet was washed in PBS, resuspended and passed through a 0.2- $\mu$ m filter, and centrifuged at 110,000×g for 1 h at 4°C. The pellet fraction was then collected and resuspended in PBS or culture medium and used for subsequent functional wire myography studies (Danish Myo Technology 6200, Aarhus, Denmark) or purity evaluation by transmission electron microscopy using a NanoSight NS300 (Malvern Instruments, UK) or Western blotting.

E-EV isolation was carried out as previously described[2]. Red blood cells from normoxia- or CIH-treated mice were separated from EDTA-anticoagulated plasma by centrifugation at 3,000 rpm for 10 min. The upper plasma and leukocyte layer were removed by carefully pipetting and the fraction of red blood cells was then passed through a WBC Syringe Filter (Acrodisc PSF WBC Syringe Filter with Leukos, Pall, USA) to remove residual white blood cells. Approximately 350  $\mu$ L of red blood cells were collected from the bottom of the microfuge tube. After washing in PBS,  $\sim 1 \times 10^{10}$  red blood cells from CIH-treated mice were resuspended in EV-free 1640 culture medium and lightly shaken under normoxia or intermittent hypoxia conditions for 20 min. The collected RBC-derived conditioned media were centrifuged progressively at 300  $\times$  g for 10 min, 2,000  $\times$  g for 10 min, 12,000  $\times$  g for 45 min to remove RBCs, dead cells and cell debris. The supernatant was then passed through a 0.2 $\mu$ m microporous membrane filter (Millipore, MA, USA) and ultracentrifuged at 110,000  $\times$  g for 70 min (Beckman Coulter, CA, USA). The EV pellets were washed with PBS to exclude contaminating proteins followed by a second ultracentrifugation at 110,000  $\times$  g for 70 min. All the centrifugation steps were performed at 4°C. The EV pellet fraction was collected for qPCR, or resuspended in PBS or culture medium for subsequent cell culture and *in vivo* mouse treatments.

### **Transmission Electron Microscopy**

Electron microscopy analysis of whole-mounted EVs was performed as previously described[1]. Briefly, S-EV pellets were fixed with 2% PFA and mounted onto grids. The grids were further fixed with 1% glutaraldehyde for 10 min and then negatively stained with methyl cellulose-UA for 10 min. After air drying, the grids were viewed using an FEI Tecnai electron microscope (FEI Tecnai, USA).

### **Western Blotting and Silver Staining**

Protein samples prepared from C57BL/6 mouse aortas under the different conditions or H5V cells treated with agomiRs (Ribobio, Guangzhou, China) or S-EVs were electrophoresed through 10% SDS-poly-acrylamide gels, and transferred onto Immobilon-P polyvinylidene difluoride membranes (Millipore Corp., Bedford, MA, USA). Blots were incubated with antibodies and signals were detected using the ECL system (Pierce ECL Western Blotting Substrate, Thermo Fisher, Pittsburgh, USA). The primary antibodies used included anti-NRF2 (1:1000, Cell Signaling Technology, USA), anti-CAT (1:1000, Abcam), anti- $\beta$ -ACTIN (1:5000, Abcam), anti-HIF-1 $\alpha$  (1:1000, Abcam), and anti-GATA1 (1:1000, Abcam), anti-TSG101 (1:1000, System Bioscience), anti-CD9 (1:1000, System Bioscience), anti-CD81 (1:1000, System Bioscience), anti-CD63 (1:1000, System Bioscience), anti-HBA1 (1:1000, ABclonal), anti-Calnexin (1:1000, Cell Signaling Technology), anti-Alix (1:1000, System Bioscience). Silver stain was used as a loading control. Briefly, gels were fixed in 50% methanol plus 50% acetic acid for 20 min followed by sensitizing in 0.02% sodium thiosulfate for 20 min. Thereafter, gels were immersed in silver reaction buffer (0.1% silver nitrate in 0.08% formalin) for 20 min and developed with 2% sodium carbonate in 0.04% formalin.

### **Fluorescent Labeling of S-EVs and Confocal Microscopy**

S-EVs were labeled with the fluorescent dye, PKH67 (Sigma, USA) as previously described[1]. The PKH67-labeled S-EV pellet was re-suspended in serum free-culture medium and incubated with mouse aortas. After incubation, aortas were cut open, washed, fixed, and visualized under confocal microscopy. Endothelial cell nuclei were stained blue with DAPI (excitation wavelength: 405 nm). EVs were stained green with PKH67 (excitation wavelength: 488 nm). Confocal microscopy images were captured with a Fluoview 1000 (FV1000, Olympus, Tokyo, Japan) and analyzed with Fluoview Version 1.5 (FV3000, Olympus).

### Measurement of Superoxide Anion Production

Fluorimetric measurements were performed using the Fluoview FV3000 laser scanning confocal system (Olympus, Tokyo, Japan). H5V cells or aortas were incubated with DHE (5  $\mu$ M in PBS containing  $\text{CaCl}_2$ ,  $\text{MgCl}_2$ , and glucose) at 37°C for 10 min in the dark. After incubation, cells or tissues were washed three times in PBS. Images were taken of DHE fluorescence with an excitation wavelength of 510 nm and an emission wavelength of 590 nm. Auto-fluorescence of elastin was observed at an excitation wavelength of 488 nm and an emission wavelength of 520 nm.

### Organ Culture of Aortic Rings with S-EVs or E-EVs

Mouse aortic rings (2 mm in length) were dissected in sterile PBS and incubated in DMEM (Gibco, USA) with or without S-EVs or E-EVs. The medium was prepared with S-EVs (from 1 mL mouse blood, ~100  $\mu$ g) or with E-EVs (from  $1 \times 10^{10}$  red blood cells, ~50  $\mu$ g) suspended in 1 mL DMEM supplemented with 10% EV-free FBS (Exo-FBS™ EVs-depleted FBS, System Biosciences), 100 IU/mL penicillin, and 100  $\mu$ g/mL streptomycin. EV-free serum was used as a negative control for all experiments. After the incubation period, aortic rings were treated with DHE staining for superoxidative anion measurement or mounted for wire myography to measure isometric forces.

### Vascular functional study

Vascular relaxation including endothelial-dependent relaxation, flow-mediated dilatation and endothelial-independent relaxation was performed as a previous report[1]. After mice were euthanized, thoracic aortae were removed and placed in oxygenated ice-cold PSS solution containing 130 mM NaCl, 4.7 mM KCl, 1.6 mM  $\text{CaCl}_2$ , 1.17 mM  $\text{MgSO}_4 \cdot \text{H}_2\text{O}$ , 14.9 mM  $\text{NaHCO}_3$ , 1.2 mM  $\text{KH}_2\text{PO}_4$ , 5.5 mM D-glucose, and 0.026 mM EDTA. Changes in the isometric tone of the aortic rings were recorded by wire myography (Danish Myo Technology 6200, Aarhus, Denmark). The rings were adjusted to an optimal baseline tension of 3 mN and allowed to equilibrate for one hour. Rings were rinsed in PSS solution before contraction with 60 mM KCl. EDR was measured in phenylephrine (3  $\mu$ M) precontracted rings by recording concentration responses to cumulative addition of acetylcholine. One group of rings was incubated with ROS scavengers, Tiron (1 mM) and DETCA (0.1 mM) for 30 min before the assay. Endothelium-independent relaxation to sodium nitroprusside was performed in aortic rings denuded of endothelium using fine forceps. Acetylcholine, phenylephrine, and sodium nitroprusside were purchased from Sigma-Aldrich (Sigma Aldrich, USA).

For flow-mediated dilatation (FMD) assay, segments of second-order resistance mesenteric arteries were dissected in sterilized PBS and cultured in DMEM for 48 h. Thereafter, each vessel was cannulated between two glass cannulas onto pressure myograph. The vessel diameter was recorded using Zeiss Axiovert 40 microscope (model 110P) aided with video camera (Danish Myo Technology, Aarhus, Denmark). Phe (10  $\mu$ M) was used to produce steady constriction in the artery stabilized at 80 mmHg intraluminal pressure; and FMD was triggered by pressure change that equals ~15 dynes/cm<sup>2</sup> shear stress. By the end of each experiment, perfusion solution was switched to a  $\text{Ca}^{2+}$ -free, EGTA (2 mM)-containing Krebs solution to induce maximum passive dilatation. FMD was presented as % of diameter changes: (flow-mediated dilatation- Phe tone)/(passive dilatation - Phe tone).

### Electroporation of EVs

Electroporation of EVs was performed using a Gene Pulser Xcell electroporator (BioRad, USA). S-EVs or E-EVs were diluted in OptiMEM (Thermo Fisher Scientific) to a total volume of 100  $\mu$ L and were electroporated with 400 pM scrambled negative control (NC) or indicated anti-miRs (Ribobio, Guangzhou, China) at 250 V. Aggregates of EVs formed during electroporation were dissociated by vigorous pipetting and immediately used to treat H5V cells or injected into mice *via* the tail vein.

### RNA Extraction

RNA for pri-miRNA or mRNA detection from mouse aortas, mouse aortic endothelial cells, red blood cells, or H5V cells was isolated using Trizol (Thermo Fisher Scientific, USA). For isolation of microRNA from aortic endothelial cells, C57BL/6 mouse aortas were cleared of adventitial adipose tissue. The lumen was quickly flushed with 150  $\mu$ L cell or tissue lysis buffer (mirVana miRNA Isolation Kit, Thermo Fisher Scientific, USA) three times using a 23 g syringe connected to a microfuge tube. The intimal miRNA was isolated from the eluate using a mirVana miRNA Isolation Kit (Thermo Fisher Scientific, USA) according to the manufacturer's protocol. The same kit was used to extract miRNA from mouse red blood cells. For isolation of miRNAs from EVs, 5 pg of the synthetic *Caenorhabditis elegans* miRNA, cel-miR-39, was added to each sample as a spike-in control for purification efficiency.

### **miRNA and pri-miRNA Analysis**

Isolated total RNAs were reverse-transcribed into complementary DNA by the M-MLV RT system (Thermo Fisher Scientific, USA). Real-time PCR for miRNAs was performed using Taqman Fast Universal PCR Master Mix (Applied Biosystems, USA). Reactions were carried out in Applied Biosystems 7900 instrument (Applied Biosystems, USA). Primer catalog numbers were: mmu482914 for mmu-miR-1a-3p; mmu480907 for mmu-miR-125b-5p; mmu478412 for mmu-miR-106b-5p; mmu482681 for mmu-miR-126a-3p; mmu481324 for mmu-miR-142a-5p; mmu483162 for mmu-let-7a-1-3p; mmu480919 for mmu-miR-132-3p mmu480947 for mmu-miR-150-5p; mmu478494 for mmu-miR-10b-5p; mmu480953 for mmu-miR-155-5p; mmu478384 for mmu-miR-27a-3p; and mmu482959 for mmu-miR-144-3p (TheromFisher, USA). Quantification of mRNAs and pri-miRNAs was performed using SYBR Green Supermix (Bio-Rad, USA). The primers used to amplify pri-miRNAs and mRNAs are shown in Table S6. Expression levels of mRNAs, pri-miRNAs, were normalized to control  $\beta$ -actin. Spike-in (cel-miR-39, miRNeasy Serum/Plasma Spike-In Control kit, QIAGEN, USA) as well as U6 was utilized as the reference to evaluate the levels of EV miRNAs. In EV-treated endothelial cells, U6 was used as the internal control for miR-144 expression. Real-time PCR was performed using an Applied Biosystems 7900 instrument (Applied Biosystems, USA).

### **Plasmid Construction and Luciferase Reporter Gene Assays**

The 3'-UTR of mouse *Nrf2* fragments was cloned into pMir luciferase reporter vector (Promega) at the *XhoI* and *NotI* sites. A 2,000-bp mouse miR-144 promoter fragment was cloned into *MluI/XhoI* sites of the reporter vector, pGL3-basic (miR-144-Luc), as wild type plasmid. For the mutant plasmid, GATA1 binding site GAAGATAACA was mutated to CTTCTATTTGT. After confirmation by DNA sequencing, the purified plasmid was transiently transfected into 293A cells using Lipofectamine 2000 reagent at a ratio of 1  $\mu$ L Lipofectamine 2000/1  $\mu$ g of DNA according to the manufacturer's protocol (Thermo Fisher Scientific). The indicated reporter constructs (0.2  $\mu$ g) were co-transfected with the indicated expression vectors and the internal control pRL-TK reporter (30 ng, Promega, USA). Luciferase activity was assessed using the Dual-Luciferase Reporter Assay System (Promega).

### **Lentiviral Treatment**

C57BL/6 mouse aortas was transfected with lentiviruses (titer  $10^9$ /mL) overexpressing *Nrf2* (from Vigene Biosciences, China) 293A cells or MEL cells were transfected with lentiviruses (titer 109/mL) overexpressing Hif-1 $\alpha$  (Hif-1 $\alpha$  OE) (a kind gift from Prof. Rui Chen, Capital Medical University, China) or Gata1 (from Vigene Biosciences, China), or Hif-1 $\alpha$  shRNA or Gata1 shRNA to silence *Hif-1 $\alpha$*  and *Gata1*, respectively (Santa Crus, USA).

### **Statistical Analysis**

Statistical analysis is summarized in the figure legends. In most cases, the results represent the mean  $\pm$  standard error of the mean (SEM) of n separate experiments. Concentration-response curves were compared by two-way analysis of variance (two-way ANOVA) followed by Bonferroni post-hoc test. Two-tailed Student's t-test was used when two groups were compared. One-way analysis of variance (ANOVA) was performed to determine whether there was a significant difference between more than two datasets, followed by Bonferroni's post hoc test.  $P < 0.05$  indicates statistical difference between groups.

## Supplementary Figures

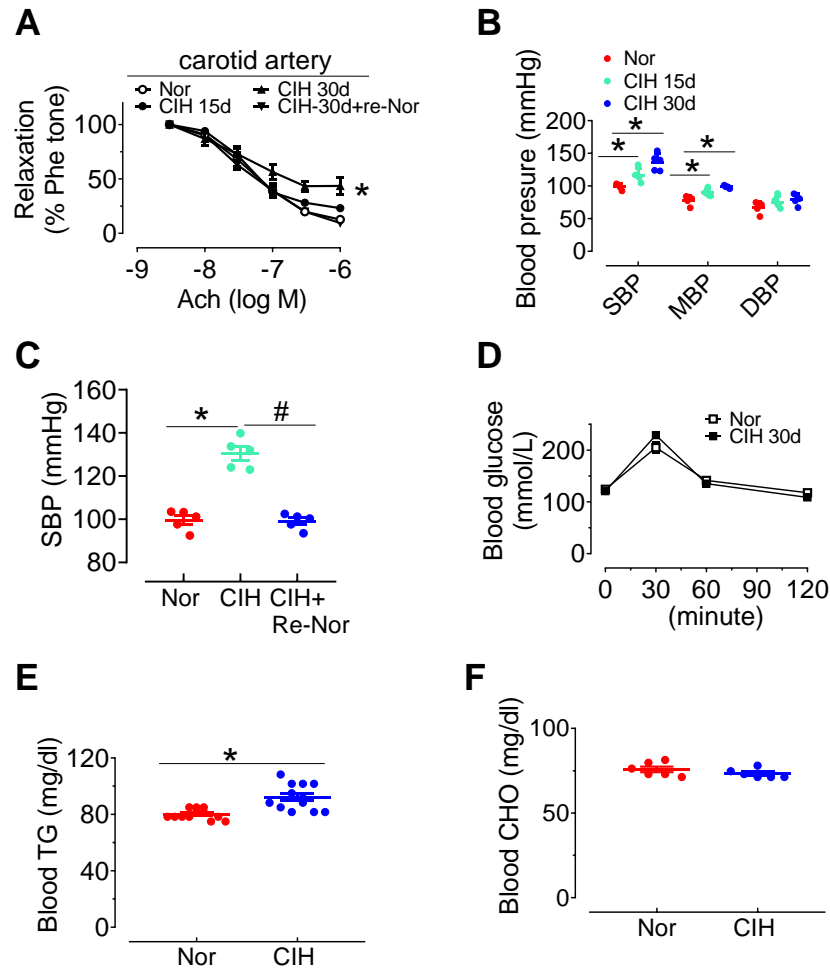

**Figure S1. Endothelial function and physiological indices of C57BL/6 mice under normoxia and chronic intermittent hypoxia (CIH) conditions.**

**A**, CIH treatment impaired endothelium-dependent relaxation in carotid arteries in a time-dependent manner. **B**, Levels of blood pressure in mice exposed to normoxia, CIH-15d and CIH-30d conditions. **C**, Levels of systolic blood pressure in mice exposed to normoxia, CIH-30d and CIH-30d plus 15-day normal oxygen conditions. **D-F**, Levels of blood glucose (**D**), blood triglyceride (**E**) and blood cholesterol (**F**) in mice exposed to normoxia and CIH-30d conditions. TG, triglyceride; CHO, cholesterol. Results are the mean  $\pm$  SEM ( $n = 4-12$ ). \* $P < 0.05$  vs. Nor. # $P < 0.05$  vs. CIH. One-way ANOVA (**B**, **C**), two-way ANOVA (**A**) and two-tailed t test (**E**).

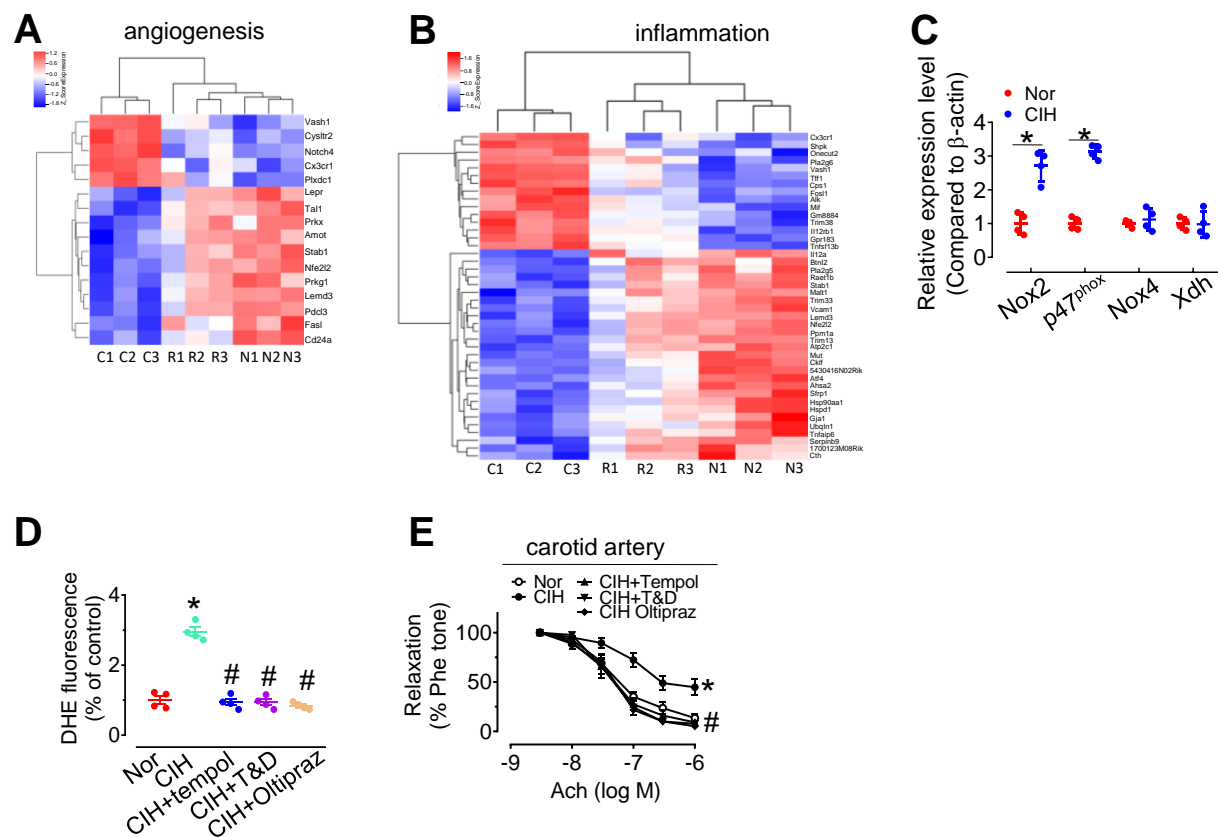

**Figure S2. Endothelial function, endothelial superoxide anion production and profiles of differentially expressed genes in aortas from mice exposed to normoxia or chronic intermittent hypoxia (CIH) conditions.**

**A-B**, Transcriptome microarray assays identified differentially expressed genes in aortas from mice treated with normoxia (N), CIH (C) or Re-Nor post-CIH (R). Kyoto Encyclopedia of Genes and Genomes (KEGG) and Gene ontology (GO) analysis predicted the functions of some of these genes to be associated with angiogenesis (A) or inflammation (B). **C**, mRNA expression of NOX subunits, *Nox2* and *p47<sup>phox</sup>*, in mouse aortas was promoted by CIH treatment for 30 days. **D-E**, Thirty-minute pretreatment with ROS scavengers, Tempol (100  $\mu$ M), or Tiron (1 mM) and DETCA (0.1 mM), or NRF2 agonist, Oltipraz (0.5 g/kg in saline, gavage once per day for 4 days before functional evaluation), blocked increased superoxide anion production in aortic endothelial cells (D) and reversed CIH-induced endothelial dysfunction in carotid aortas after CIH incubation for 30 days (E). Results are the mean  $\pm$  SEM (n = 4). \**P* < 0.05 vs. Nor. #*P* < 0.05 vs. CIH. One-way ANOVA (D), two-way ANOVA (E) and two-tailed t test (C).

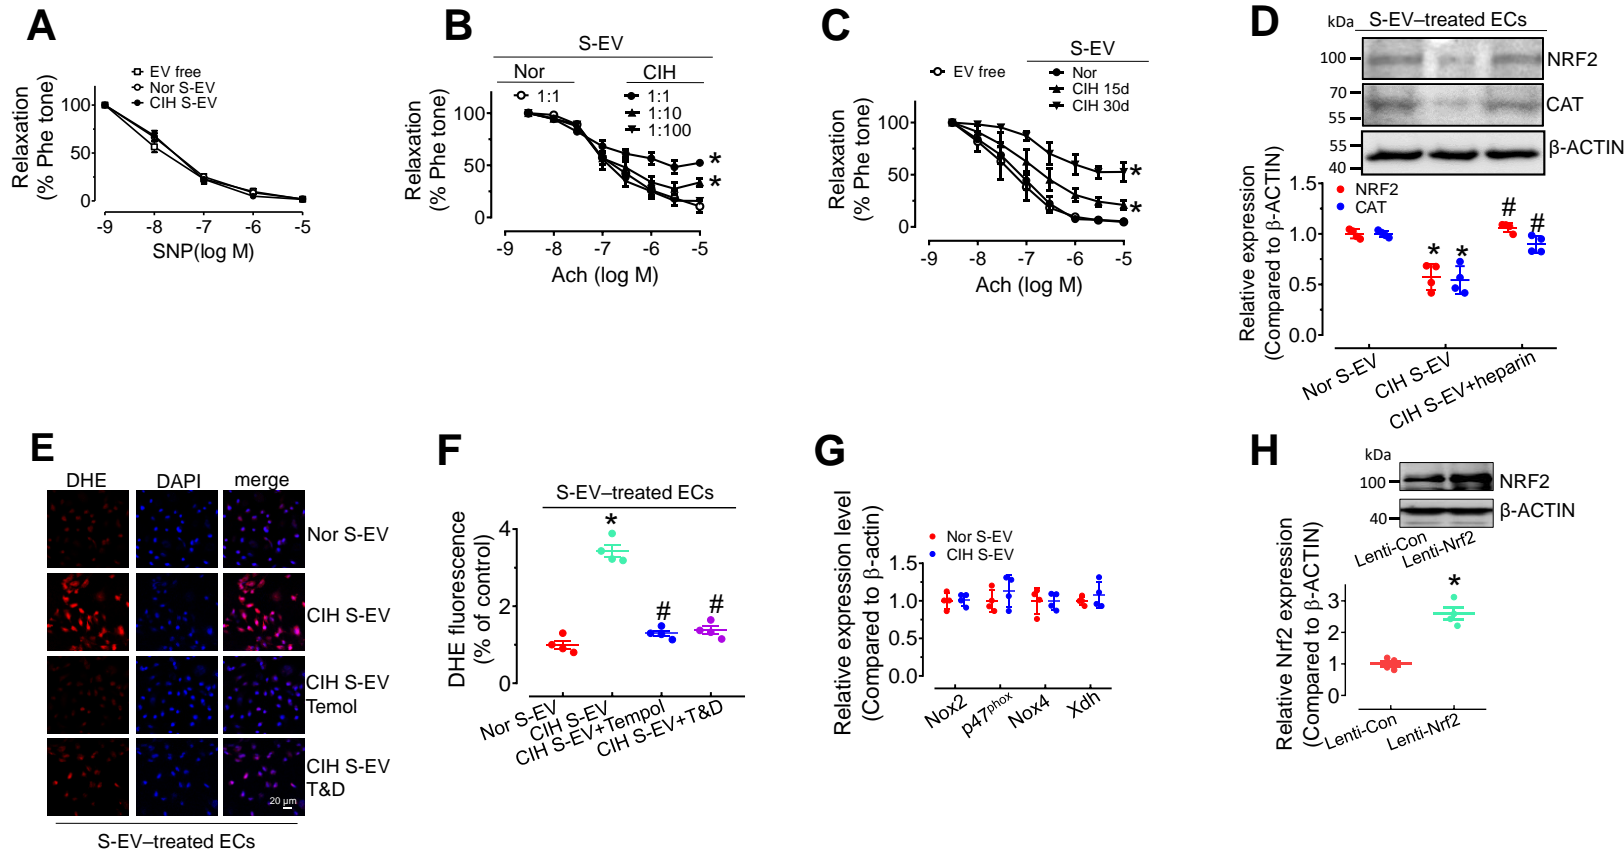

**Figure S3. CIH S-EVs impair endothelial function, augment superoxide anion radical generation and decrease NRF2 expression in endothelial cells.**

**A**, sodium nitroprusside-induced endothelium-independent relaxation of mouse aortas following serum extracellular vesicle (S-EV) treatment. **B**, Forty-eight-h treatment with CIH S-EVs impaired acetylcholine-induced endothelium-dependent relaxation (EDR) in mouse aortas in a dose-dependent manner. 1: n dilution means S-EVs from 1 mL blood were suspended in n mL S-EV-free medium. **C**, 30-day CIH S-EV treatment had a more severe adverse effect on endothelial function compared with 15-day CIH S-EV treatment. **D**, CIH S-EV treatment reduced the protein level of the antioxidant transcription factor, NRF2, and its downstream target, CAT, in H5V cells. The lower panels show the relative levels of NRF2 and CAT. **E-F**, CIH S-EV-incubation increased superoxide anion production in H5V cells, which was blocked by 30 min-pretreatment with ROS scavengers, Tempol (100 μM), or Tiron (1 mM) and DETCA (0.1 mM) (E) Summary of the dihydroethidium (DHE) fluorescence intensity (F). **G**, CIH S-EV did not change the mRNA levels of NOX subunits or *Xdh* in H5V cells. **H**, Lentivirus-mediated overexpression of *Nrf2* in mouse aortas after 48-h infection. Results are the mean ± SEM (n = 4). \**P* < 0.05 vs. Nor S-EV. #*P* < 0.05 vs. CIH S-EV. One-way ANOVA (D, F, G) and two-way ANOVA (B, C).



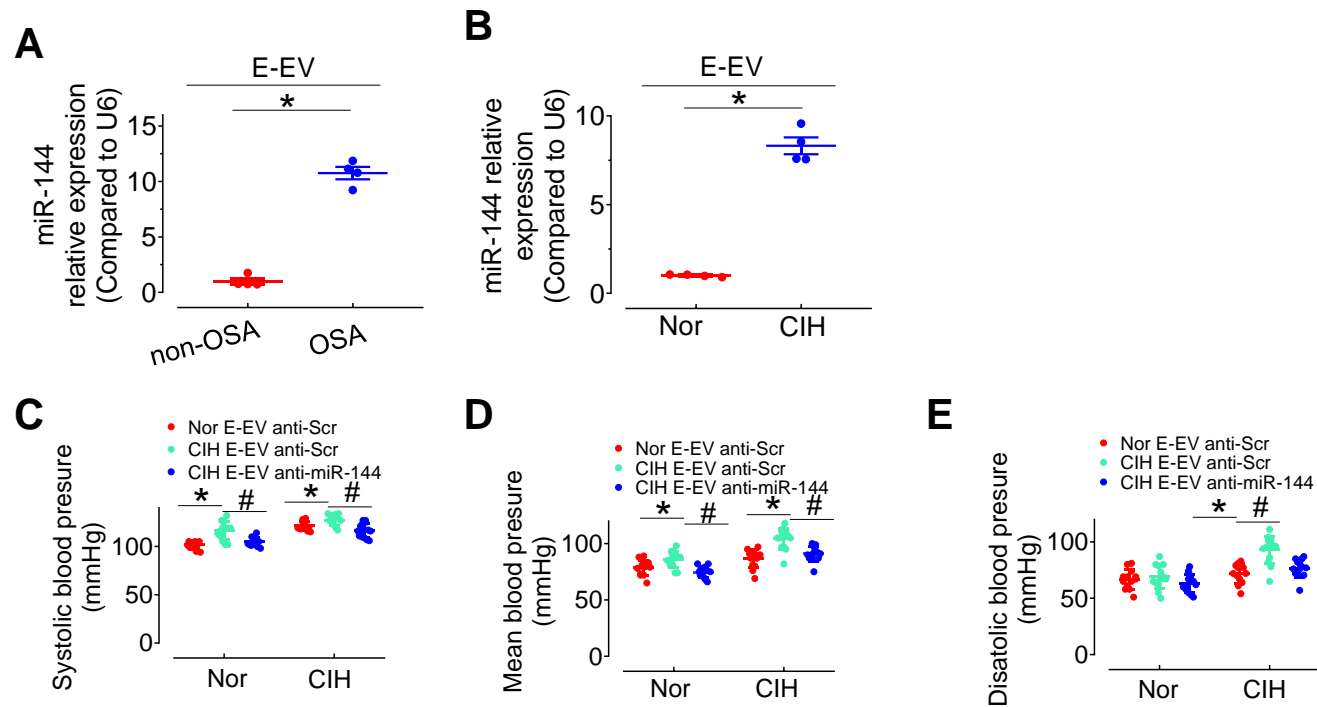

**Figure S4. Blood pressure influenced by E-EVs and anti-miR-144-loaded CIH E-EVs.**

**A-B**, qPCR determined the expression levels of miR-144 in E-EVs from OSA patients (A), CIH-exposed mice (B), and their control groups (U6 as the reference). **C-E**, The influence of Nor E-EVs, CIH E-EVs and anti-miR-144-loaded CIH S-EVs on systolic blood pressure (A), mean blood pressure (B) and diastolic blood pressure (C) under normoxia or chronic intermittent hypoxia. Results are the mean  $\pm$  SEM (n = 4-13). \* $P$  < 0.05 vs. OSA E-EV (A), or Nor E-EV (B), or Nor E-EV anti-Scr (C-E). # $P$  < 0.05 vs. CIH E-EV anti-Scr. Two-tailed t test (A, B); One-way ANOVA (C-E).

**Table S1. Differentially expressed proteins in aortas from CIH-treated mice.**

| No. | Target ID          | Gene ID | Gene Symbol | Fold (IH vs.N) | Reg. (IH vs.N) | P Value (IH vs.N) | Fold (RNpIH vs.IH) | Reg. (RNpIH vs.IH) | p Value (RNpIH vs.IH) |
|-----|--------------------|---------|-------------|----------------|----------------|-------------------|--------------------|--------------------|-----------------------|
| 1   | AK084136           | 319388  | Irx3os      | -5.45          | down           | 0.00              | 1.95               | up                 | 0.05                  |
| 2   | NM_010480          | 15519   | Hsp90aa1    | -4.23          | down           | 0.00              | 1.85               | up                 | 0.04                  |
| 3   | NM_009786          | 12301   | Cacybp      | -4.16          | down           | 0.01              | 1.94               | up                 | 0.04                  |
| 4   | NM_172391          | 268390  | Ahsa2       | -4.06          | down           | 0.01              | 1.79               | up                 | 0.04                  |
| 5   | AK039015           |         |             | -3.87          | down           | 0.00              | 1.80               | up                 | 0.02                  |
| 6   | NM_013863          | 29810   | Bag3        | -3.62          | down           | 0.00              | 1.83               | up                 | 0.02                  |
| 7   | AK018597           | 26359   | Anxa10      | -3.21          | down           | 0.01              | 1.89               | up                 | 0.00                  |
| 8   | ENSMUST00000135943 | 66234   | Msmo1       | -3.18          | down           | 0.00              | 1.55               | up                 | 0.03                  |
| 9   | NM_175692          | 319317  | Snhg11      | -3.17          | down           | 0.01              | 1.93               | up                 | 0.05                  |
| 10  | NM_025819          | 66875   | Swt1        | -3.16          | down           | 0.00              | 1.59               | up                 | 0.04                  |
| 11  | AK199574           | 70788   | Klhl30      | -3.13          | down           | 0.00              | 1.28               | up                 | 0.02                  |
| 12  | BG080251           | 97177   | Gm12670     | -3.11          | down           | 0.00              | 1.49               | up                 | 0.02                  |
| 13  | AK171865           | 105203  | Fam208b     | -3.06          | down           | 0.00              | 1.77               | up                 | 0.03                  |
| 14  | AK087131           |         |             | -3.04          | down           | 0.00              | 1.89               | up                 | 0.02                  |
| 15  | NM_025844          | 66917   | Chordc1     | -3.01          | down           | 0.01              | 1.72               | up                 | 0.05                  |
| 16  | NM_010177          | 14103   | Fasl        | -3.01          | down           | 0.00              | 1.97               | up                 | 0.02                  |
| 17  | NM_028094          | 72094   | Ugt2a3      | -2.98          | down           | 0.00              | 1.90               | up                 | 0.00                  |
| 18  | ENSMUST00000192142 | 108664  | Atp6v1h     | -2.93          | down           | 0.00              | 1.85               | up                 | 0.02                  |
| 19  | ENSMUST00000172726 |         |             | -2.90          | down           | 0.00              | 1.78               | up                 | 0.04                  |
| 20  | AK039495           | 30056   | Timm9       | -2.89          | down           | 0.00              | 1.85               | up                 | 0.00                  |
| 21  | NM_177225          | 320679  | Samd12      | -2.86          | down           | 0.00              | 1.99               | up                 | 0.03                  |
| 22  | NM_177583          | 208117  | Aph1b       | -2.85          | down           | 0.00              | 1.92               | up                 | 0.01                  |
| 23  | ENSMUST00000132911 | 269536  | Tex10       | -2.83          | down           | 0.00              | 1.92               | up                 | 0.04                  |
| 24  | NM_009471          | 22247   | Umps        | -2.83          | down           | 0.01              | 1.95               | up                 | 0.03                  |
| 25  | NM_001039710       | 67876   | Coq10b      | -2.82          | down           | 0.00              | 1.82               | up                 | 0.04                  |

|    |                    |        |              |       |      |      |      |    |      |
|----|--------------------|--------|--------------|-------|------|------|------|----|------|
| 26 | ENSMUST00000051437 |        |              | -2.81 | down | 0.02 | 1.97 | up | 0.03 |
| 27 | NM_001122954       | 18784  | Pla2g5       | -2.77 | down | 0.01 | 1.93 | up | 0.04 |
| 28 | XM_006527126       | 271564 | Vps13a       | -2.76 | down | 0.00 | 1.98 | up | 0.01 |
| 29 | AV310571           |        |              | -2.75 | down | 0.01 | 1.69 | up | 0.02 |
| 30 | NM_001164286       | 408191 | Gm5415       | -2.75 | down | 0.00 | 1.56 | up | 0.00 |
| 31 | ENSMUST00000069778 | 224224 | Impg2        | -2.73 | down | 0.00 | 1.75 | up | 0.00 |
| 32 | XM_006535986       | 1E+08  | LOC100862442 | -2.72 | down | 0.00 | 1.67 | up | 0.03 |
| 33 | NM_145521          | 227721 | Ppapdc3      | -2.70 | down | 0.01 | 1.90 | up | 0.00 |
| 34 | NM_009551          | 22682  | Zfand5       | -2.69 | down | 0.00 | 1.74 | up | 0.01 |
| 35 | NM_001256112       | 76824  | Mtfr11       | -2.67 | down | 0.00 | 1.39 | up | 0.01 |
| 36 | ENSMUST00000190232 |        |              | -2.66 | down | 0.01 | 1.66 | up | 0.00 |
| 37 | AK080258           |        |              | -2.65 | down | 0.00 | 1.54 | up | 0.00 |
| 38 | NM_009837          | 12464  | Cct4         | -2.64 | down | 0.00 | 1.74 | up | 0.01 |
| 39 | NM_026674          | 68318  | Aph1c        | -2.63 | down | 0.00 | 1.75 | up | 0.02 |
| 40 | XM_006534815       | 18764  | Pkd2         | -2.63 | down | 0.00 | 1.91 | up | 0.01 |
| 41 | NM_177788          | 277978 | Exoc3l       | -2.59 | down | 0.00 | 1.35 | up | 0.01 |
| 42 | NM_153786          | 215031 | Vgll2        | -2.58 | down | 0.02 | 1.80 | up | 0.02 |
| 43 | ENSMUST00000145024 | 16847  | Lepr         | -2.57 | down | 0.00 | 1.87 | up | 0.04 |
| 44 | NM_146118          | 227731 | Slc25a25     | -2.56 | down | 0.00 | 1.88 | up | 0.01 |
| 45 | NM_027805          | 71474  | Ppp6r2       | -2.56 | down | 0.01 | 1.50 | up | 0.05 |
| 46 | NM_181040          | 230649 | Atpaf1       | -2.56 | down | 0.00 | 1.78 | up | 0.00 |
| 47 | ENSMUST00000099029 |        |              | -2.56 | down | 0.00 | 1.65 | up | 0.00 |
| 48 | ENSMUST00000152019 | 22083  | Ctr9         | -2.54 | down | 0.00 | 1.78 | up | 0.01 |
| 49 | AK171523           | 407830 | BC010981     | -2.54 | down | 0.00 | 1.54 | up | 0.02 |
| 50 | NAP111319-1        |        |              | -2.54 | down | 0.00 | 1.52 | up | 0.01 |
| 51 | AK047768           | 11472  | Actn2        | -2.52 | down | 0.01 | 1.70 | up | 0.00 |
| 52 | NM_029295          | 75458  | Cklf         | -2.52 | down | 0.00 | 1.42 | up | 0.02 |
| 53 | ENSMUST00000178218 | 216877 | Dhx33        | -2.52 | down | 0.00 | 1.71 | up | 0.02 |
| 54 | NAP061415-1        |        |              | -2.51 | down | 0.00 | 1.47 | up | 0.03 |
| 55 | TC1636899          |        |              | -2.51 | down | 0.00 | 1.84 | up | 0.03 |
| 56 | NM_008351          | 16159  | Il12a        | -2.51 | down | 0.00 | 1.99 | up | 0.02 |

|    |                    |        |               |       |      |      |      |    |      |
|----|--------------------|--------|---------------|-------|------|------|------|----|------|
| 57 | NM_001082485       | 77519  | Zfp266        | -2.50 | down | 0.00 | 1.97 | up | 0.02 |
| 58 | NM_199062          | 331188 | Zfp781        | -2.50 | down | 0.00 | 1.80 | up | 0.00 |
| 59 | ENSMUST00000160058 |        |               | -2.50 | down | 0.01 | 1.63 | up | 0.03 |
| 60 | ENSMUST00000162574 |        |               | -2.49 | down | 0.00 | 1.54 | up | 0.02 |
| 61 | NM_010477          | 15510  | Hspd1         | -2.48 | down | 0.01 | 1.67 | up | 0.03 |
| 62 | NAP099731-001      |        |               | -2.48 | down | 0.00 | 1.96 | up | 0.00 |
| 63 | AK157456           | 329892 | Gm830         | -2.48 | down | 0.02 | 1.82 | up | 0.04 |
| 64 | AK134128           | 14852  | Gspt1         | -2.48 | down | 0.00 | 1.54 | up | 0.02 |
| 65 | NM_009543          | 22644  | Rnf103        | -2.47 | down | 0.00 | 1.59 | up | 0.03 |
| 66 | AK172643           | 73130  | Tmed5         | -2.47 | down | 0.01 | 1.89 | up | 0.01 |
| 67 | AI606402           | 73880  | 4930415C11Rik | -2.47 | down | 0.00 | 1.90 | up | 0.01 |
| 68 | ENSMUST00000121742 |        |               | -2.47 | down | 0.00 | 1.91 | up | 0.00 |
| 69 | NM_001081152       | 244879 | Npat          | -2.46 | down | 0.01 | 1.92 | up | 0.03 |
| 70 | ENSMUST00000030015 | 74753  | 5830415F09Rik | -2.46 | down | 0.00 | 1.55 | up | 0.01 |
| 71 | NM_175250          | 76971  | Sult2a8       | -2.46 | down | 0.00 | 2.00 | up | 0.01 |
| 72 | NM_177431          | 223838 | Adamts20      | -2.45 | down | 0.00 | 1.99 | up | 0.00 |
| 73 | ENSMUST00000185704 |        |               | -2.45 | down | 0.00 | 1.96 | up | 0.00 |
| 74 | AK016918           | 71169  | Nbas          | -2.44 | down | 0.02 | 1.62 | up | 0.00 |
| 75 | ENSMUST00000117199 |        |               | -2.44 | down | 0.00 | 1.87 | up | 0.01 |
| 76 | NM_025676          | 66634  | Mcm8          | -2.44 | down | 0.00 | 1.92 | up | 0.01 |
| 77 | NM_010902          | 18024  | Nfe2l2        | -2.44 | down | 0.00 | 1.86 | up | 0.04 |
| 78 | NM_009908          | 12764  | Cmas          | -2.44 | down | 0.00 | 1.46 | up | 0.01 |
| 79 | NM_025875          | 60365  | Rbm8a         | -2.43 | down | 0.00 | 1.74 | up | 0.02 |
| 80 | NM_145953          | 107869 | Cth           | -2.43 | down | 0.04 | 1.95 | up | 0.02 |
| 81 | AK137479           | 52348  | Vps37a        | -2.43 | down | 0.00 | 1.46 | up | 0.04 |
| 82 | NM_009549          | 22673  | Zfp185        | -2.42 | down | 0.01 | 1.51 | up | 0.01 |
| 83 | NM_146189          | 233199 | Mybpc2        | -2.42 | down | 0.05 | 1.56 | up | 0.03 |
| 84 | NM_133940          | 101358 | Fbxl14        | -2.41 | down | 0.00 | 1.77 | up | 0.01 |
| 85 | NM_023773          | 75339  | Mphosph8      | -2.41 | down | 0.00 | 1.75 | up | 0.02 |
| 86 | NM_001029977       | 214403 | Gm4788        | -2.41 | down | 0.00 | 1.90 | up | 0.00 |
| 87 | NM_177356          | 239739 | Lamp3         | -2.40 | down | 0.00 | 1.68 | up | 0.01 |

|     |                    |        |         |       |      |      |      |    |      |
|-----|--------------------|--------|---------|-------|------|------|------|----|------|
| 88  | ENSMUST00000119147 |        |         | -2.40 | down | 0.00 | 1.66 | up | 0.00 |
| 89  | NM_201369          | 381695 | N4bp2l2 | -2.40 | down | 0.00 | 1.64 | up | 0.00 |
| 90  | NAP069232-1        |        |         | -2.39 | down | 0.00 | 1.66 | up | 0.01 |
| 91  | NM_008650          | 17850  | Mut     | -2.39 | down | 0.00 | 1.56 | up | 0.01 |
| 92  | AK162903           | 72465  | Zfp131  | -2.39 | down | 0.00 | 1.61 | up | 0.04 |
| 93  | NM_030072          | 665270 | Plb1    | -2.39 | down | 0.00 | 1.40 | up | 0.01 |
| 94  | NM_028059          | 72020  | Zfp654  | -2.39 | down | 0.01 | 1.98 | up | 0.05 |
| 95  | BC019993           | 21340  | Taf1b   | -2.38 | down | 0.00 | 1.33 | up | 0.01 |
| 96  | NM_177304          | 320981 | Enpp6   | -2.38 | down | 0.00 | 1.92 | up | 0.04 |
| 97  | NM_029851          | 110350 | Dync2h1 | -2.38 | down | 0.00 | 1.77 | up | 0.02 |
| 98  | NM_009398          | 21930  | Tnfaip6 | -2.38 | down | 0.01 | 1.65 | up | 0.01 |
| 99  | NM_007729          | 12814  | Col11a1 | -2.38 | down | 0.00 | 1.54 | up | 0.03 |
| 100 | AK078446           | 1E+08  | Gm14410 | -2.38 | down | 0.00 | 1.85 | up | 0.01 |
| 101 | NM_175308          | 100465 | Mob3c   | -2.38 | down | 0.00 | 1.59 | up | 0.04 |
| 102 | NAP111303-1        |        |         | -2.37 | down | 0.00 | 1.88 | up | 0.00 |
| 103 | NM_178722          | 240186 | Zfp438  | -2.37 | down | 0.00 | 1.83 | up | 0.02 |
| 104 | NM_010330          | 13723  | Emb     | -2.35 | down | 0.00 | 1.72 | up | 0.01 |
| 105 | NM_029790          | 76894  | Mettl15 | -2.35 | down | 0.00 | 1.48 | up | 0.05 |
| 106 | NM_029555          | 76263  | Gstk1   | -2.35 | down | 0.00 | 1.47 | up | 0.03 |
| 107 | NM_001144855       | 68507  | Ppfia4  | -2.35 | down | 0.00 | 1.57 | up | 0.00 |
| 108 | NM_011082          | 18703  | Pigr    | -2.35 | down | 0.01 | 1.57 | up | 0.02 |
| 109 | NM_145368          | 209186 | Acnat2  | -2.35 | down | 0.00 | 1.66 | up | 0.02 |
| 110 | NM_026578          | 68147  | Gar1    | -2.35 | down | 0.00 | 1.82 | up | 0.01 |
| 111 | ENSMUST00000066241 |        |         | -2.34 | down | 0.00 | 1.47 | up | 0.04 |
| 112 | NAP005004-001      |        |         | -2.33 | down | 0.00 | 1.81 | up | 0.01 |
| 113 | NM_001287388       | 21349  | Tal1    | -2.33 | down | 0.00 | 1.88 | up | 0.00 |
| 114 | NM_026637          | 110175 | Ggct    | -2.33 | down | 0.00 | 1.99 | up | 0.05 |
| 115 | NM_028787          | 74150  | Slc35f5 | -2.33 | down | 0.01 | 1.99 | up | 0.01 |
| 116 | NM_025421          | 66204  | Acyp1   | -2.33 | down | 0.00 | 1.80 | up | 0.01 |
| 117 | ENSMUST00000188463 | 103268 | Cep57l1 | -2.33 | down | 0.01 | 1.94 | up | 0.01 |
| 118 | NM_009826          | 12421  | Rb1cc1  | -2.33 | down | 0.00 | 1.62 | up | 0.02 |

|     |                    |        |               |       |      |      |      |    |      |
|-----|--------------------|--------|---------------|-------|------|------|------|----|------|
| 119 | AF425084           | 97848  | Serpinb6c     | -2.32 | down | 0.01 | 1.76 | up | 0.04 |
| 120 | XM_006497255       | 329324 | Syt14         | -2.32 | down | 0.00 | 1.69 | up | 0.01 |
| 121 | NM_053090          | 84652  | Fam126a       | -2.31 | down | 0.01 | 1.66 | up | 0.04 |
| 122 | NM_178610          | 52705  | Krr1          | -2.31 | down | 0.00 | 1.56 | up | 0.01 |
| 123 | NM_001081254       | 545136 | Fam186b       | -2.31 | down | 0.00 | 1.51 | up | 0.03 |
| 124 | NM_021421          | 52477  | Angel2        | -2.31 | down | 0.00 | 1.65 | up | 0.03 |
| 125 | NM_001114332       | 72472  | Slc16a10      | -2.31 | down | 0.01 | 1.96 | up | 0.01 |
| 126 | ENSMUST00000142299 |        |               | -2.31 | down | 0.00 | 1.69 | up | 0.01 |
| 127 | NM_009017          | 19369  | Raet1b        | -2.31 | down | 0.00 | 1.70 | up | 0.03 |
| 128 | NM_134072          | 105387 | Akr1c14       | -2.31 | down | 0.00 | 1.72 | up | 0.02 |
| 129 | NM_001164493       | 208439 | Klhl29        | -2.31 | down | 0.01 | 1.81 | up | 0.02 |
| 130 | ENSMUST00000122407 |        |               | -2.30 | down | 0.00 | 1.83 | up | 0.00 |
| 131 | DW711327           |        |               | -2.30 | down | 0.00 | 1.38 | up | 0.01 |
| 132 | AK016293           | 114670 | 4930573O21Rik | -2.30 | down | 0.01 | 1.64 | up | 0.01 |
| 133 | NM_025513          | 66362  | Exosc3        | -2.29 | down | 0.00 | 1.85 | up | 0.00 |
| 134 | XM_006514760       | 544763 | Hbq1b         | -2.29 | down | 0.00 | 1.79 | up | 0.00 |
| 135 | NM_013642          | 19252  | Dusp1         | -2.29 | down | 0.01 | 1.57 | up | 0.03 |
| 136 | NM_011721          | 22427  | Wrn           | -2.29 | down | 0.00 | 1.72 | up | 0.00 |
| 137 | NM_025903          | 15983  | Ifrd2         | -2.29 | down | 0.00 | 1.74 | up | 0.01 |
| 138 | NM_197943          | 97761  | Sgsm2         | -2.29 | down | 0.00 | 1.71 | up | 0.01 |
| 139 | NM_025483          | 66315  | Senp7         | -2.29 | down | 0.03 | 1.77 | up | 0.04 |
| 140 | NM_001128151       | 330409 | Cecr2         | -2.28 | down | 0.00 | 1.64 | up | 0.00 |
| 141 | NM_009152          | 20346  | Sema3a        | -2.28 | down | 0.01 | 1.78 | up | 0.00 |
| 142 | NM_146532          | 258525 | Olf1170       | -2.28 | down | 0.00 | 1.45 | up | 0.03 |
| 143 | NM_053137          | 93883  | Pcdhb12       | -2.27 | down | 0.00 | 1.69 | up | 0.00 |
| 144 | ENSMUST00000139897 | 22608  | Ybx1          | -2.27 | down | 0.00 | 1.99 | up | 0.00 |
| 145 | NM_001013833       | 19091  | Prkg1         | -2.27 | down | 0.00 | 1.80 | up | 0.01 |
| 146 | NM_028817          | 74205  | Acsl3         | -2.26 | down | 0.00 | 1.91 | up | 0.01 |
| 147 | NM_008892          | 18968  | Pola1         | -2.26 | down | 0.00 | 1.85 | up | 0.01 |
| 148 | NAP094867-001      |        |               | -2.26 | down | 0.00 | 1.66 | up | 0.02 |
| 149 | ENSMUST00000199146 |        |               | -2.26 | down | 0.00 | 1.66 | up | 0.00 |

|     |                    |        |               |       |      |      |      |    |      |
|-----|--------------------|--------|---------------|-------|------|------|------|----|------|
| 150 | NM_028011          | 71943  | Tom11l        | -2.26 | down | 0.00 | 1.99 | up | 0.00 |
| 151 | NM_026904          | 68999  | Anapc10       | -2.25 | down | 0.00 | 1.65 | up | 0.02 |
| 152 | BC027541           | 320586 | A630089N07Rik | -2.25 | down | 0.00 | 1.69 | up | 0.01 |
| 153 | NM_001161765       | 14263  | Fmo5          | -2.25 | down | 0.01 | 1.64 | up | 0.03 |
| 154 | NM_138672          | 192187 | Stab1         | -2.25 | down | 0.00 | 1.61 | up | 0.04 |
| 155 | NM_146009          | 216274 | Cep290        | -2.25 | down | 0.02 | 1.61 | up | 0.02 |
| 156 | NM_009838          | 12466  | Cct6a         | -2.25 | down | 0.00 | 1.63 | up | 0.01 |
| 157 | NM_133702          | 68979  | Nol11         | -2.24 | down | 0.00 | 1.57 | up | 0.00 |
| 158 | NM_001290350       | 22696  | Zfp37         | -2.24 | down | 0.00 | 1.55 | up | 0.04 |
| 159 | NM_028108          | 72117  | Naa50         | -2.24 | down | 0.00 | 1.58 | up | 0.02 |
| 160 | NM_001102458       | 54375  | Azin1         | -2.24 | down | 0.01 | 1.54 | up | 0.03 |
| 161 | NM_009846          | 12484  | Cd24a         | -2.24 | down | 0.00 | 1.38 | up | 0.04 |
| 162 | NM_025722          | 66714  | 4921524J17Rik | -2.24 | down | 0.00 | 1.84 | up | 0.03 |
| 163 | NM_001081021       | 338354 | Zfp780b       | -2.24 | down | 0.00 | 1.74 | up | 0.04 |
| 164 | ENSMUST00000125228 | 22718  | Zfp60         | -2.24 | down | 0.01 | 1.43 | up | 0.03 |
| 165 | NM_008467          | 16649  | Kpna4         | -2.23 | down | 0.00 | 1.92 | up | 0.01 |
| 166 | NM_173734          | 211499 | Tmem87a       | -2.23 | down | 0.01 | 1.83 | up | 0.00 |
| 167 | ENSMUST00000151080 | 18667  | Pgr           | -2.23 | down | 0.02 | 1.96 | up | 0.04 |
| 168 | NM_008690          | 18037  | Nfkbie        | -2.23 | down | 0.00 | 1.81 | up | 0.01 |
| 169 | NM_175357          | 58799  | Crbn          | -2.23 | down | 0.00 | 1.79 | up | 0.02 |
| 170 | NM_029068          | 74718  | Snx16         | -2.23 | down | 0.00 | 1.38 | up | 0.03 |
| 171 | NM_201529          | 380928 | Lmo7          | -2.23 | down | 0.00 | 1.45 | up | 0.04 |
| 172 | ENSMUST00000151163 | 22343  | Lin7c         | -2.23 | down | 0.00 | 1.54 | up | 0.02 |
| 173 | XM_006530046       | 1E+08  | Gm14409       | -2.23 | down | 0.00 | 1.58 | up | 0.01 |
| 174 | NM_016746          | 51813  | Ccnc          | -2.22 | down | 0.00 | 1.65 | up | 0.00 |
| 175 | NM_008379          | 16211  | Kpnb1         | -2.22 | down | 0.00 | 1.86 | up | 0.01 |
| 176 | NM_001033851       | 66871  | Cpne8         | -2.22 | down | 0.00 | 1.58 | up | 0.00 |
| 177 | CO430613           |        |               | -2.22 | down | 0.00 | 1.99 | up | 0.01 |
| 178 | NM_053075          | 19744  | Rheb          | -2.22 | down | 0.00 | 1.96 | up | 0.00 |
| 179 | NM_028116          | 72135  | Pygo1         | -2.22 | down | 0.01 | 1.90 | up | 0.03 |
| 180 | NM_028924          | 74413  | Tc2n          | -2.22 | down | 0.00 | 1.84 | up | 0.01 |

|     |                    |        |               |       |      |      |      |    |      |
|-----|--------------------|--------|---------------|-------|------|------|------|----|------|
| 181 | NM_029564          | 76281  | Tax1bp3       | -2.22 | down | 0.00 | 1.60 | up | 0.01 |
| 182 | NM_001301859       | 22200  | Uba3          | -2.22 | down | 0.00 | 1.77 | up | 0.00 |
| 183 | ENSMUST00000041638 | 98488  | Gtf3c3        | -2.22 | down | 0.00 | 1.89 | up | 0.00 |
| 184 | NM_025820          | 66877  | Crnk11        | -2.22 | down | 0.00 | 1.87 | up | 0.02 |
| 185 | NM_029749          | 76800  | Usp42         | -2.21 | down | 0.00 | 1.70 | up | 0.02 |
| 186 | NM_001205101       | 433801 | Gm13212       | -2.21 | down | 0.00 | 1.89 | up | 0.01 |
| 187 | NM_026554          | 68092  | Ncbp2         | -2.21 | down | 0.00 | 1.87 | up | 0.01 |
| 188 | NM_001005358       | 449000 | Zfp960        | -2.21 | down | 0.00 | 1.81 | up | 0.03 |
| 189 | NM_011919          | 26356  | Ing1          | -2.21 | down | 0.00 | 1.80 | up | 0.01 |
| 190 | NM_176987          | 319719 | Simc1         | -2.21 | down | 0.00 | 1.67 | up | 0.02 |
| 191 | NM_001190356       | 225058 | Gm4832        | -2.21 | down | 0.00 | 1.40 | up | 0.02 |
| 192 | NM_001142952       | 74645  | Fam46c        | -2.21 | down | 0.00 | 1.62 | up | 0.02 |
| 193 | NM_181517          | 233726 | Ipo7          | -2.21 | down | 0.00 | 1.93 | up | 0.01 |
| 194 | NM_001033156       | 70611  | Fbxo33        | -2.21 | down | 0.00 | 1.82 | up | 0.02 |
| 195 | XM_006543774       | 625281 | Gm6570        | -2.21 | down | 0.00 | 1.52 | up | 0.03 |
| 196 | XM_006531843       |        | 1700055N04Rik | -2.20 | down | 0.00 | 1.97 | up | 0.00 |
| 197 | NM_139232          | 224014 | Fgd4          | -2.20 | down | 0.00 | 1.85 | up | 0.01 |
| 198 | NM_026396          | 67832  | Brix1         | -2.20 | down | 0.01 | 1.87 | up | 0.04 |
| 199 | NM_177588          | 208967 | Thns11        | -2.20 | down | 0.00 | 1.74 | up | 0.01 |
| 200 | NM_173446          | 270028 | Fam155a       | -2.20 | down | 0.00 | 1.88 | up | 0.00 |
| 201 | NM_026850          | 68833  | Pdcl3         | -2.19 | down | 0.00 | 1.75 | up | 0.01 |
| 202 | NM_175394          | 60532  | Wtap          | -2.19 | down | 0.00 | 1.70 | up | 0.01 |
| 203 | NM_001014397       | 433804 | Gm13154       | -2.19 | down | 0.00 | 1.80 | up | 0.03 |
| 204 | NM_145492          | 225207 | Zfp521        | -2.19 | down | 0.01 | 1.75 | up | 0.02 |
| 205 | NM_146016          | 237711 | Eml6          | -2.19 | down | 0.00 | 1.58 | up | 0.01 |
| 206 | NM_145943          | 208768 | Sde2          | -2.19 | down | 0.00 | 1.83 | up | 0.02 |
| 207 | NM_144811          | 52609  | Cbx7          | -2.18 | down | 0.01 | 1.89 | up | 0.05 |
| 208 | NM_011496          | 20877  | Aurkb         | -2.18 | down | 0.00 | 1.89 | up | 0.04 |
| 209 | XM_011244594       | 1E+08  | Gm3325        | -2.18 | down | 0.02 | 1.60 | up | 0.01 |
| 210 | NM_011693          | 22329  | Vcam1         | -2.18 | down | 0.00 | 1.54 | up | 0.01 |
| 211 | NM_009770          | 12228  | Btg3          | -2.17 | down | 0.00 | 1.79 | up | 0.01 |



|     |                    |        |                 |       |      |      |      |    |      |
|-----|--------------------|--------|-----------------|-------|------|------|------|----|------|
| 212 | NM_001012638       | 497652 | Acd             | -2.17 | down | 0.00 | 1.96 | up | 0.00 |
| 213 | NM_026348          | 67733  | Itgb3bp         | -2.17 | down | 0.00 | 1.99 | up | 0.01 |
| 214 | NM_001039184       | 74081  | Cep350          | -2.17 | down | 0.00 | 1.69 | up | 0.01 |
| 215 | NM_021273          | 12709  | Ckb             | -2.17 | down | 0.00 | 1.40 | up | 0.02 |
| 216 | NM_001142963       | 1E+08  | Gm10778         | -2.17 | down | 0.00 | 1.75 | up | 0.00 |
| 217 | ENSMUST00000119319 |        |                 | -2.17 | down | 0.00 | 1.88 | up | 0.01 |
| 218 | FJ422280           | 1E+08  | Gm17501         | -2.17 | down | 0.01 | 1.91 | up | 0.03 |
| 219 | NM_010016          | 13136  | Cd55            | -2.17 | down | 0.00 | 1.57 | up | 0.01 |
| 220 | NM_019727          | 56440  | Snx1            | -2.17 | down | 0.00 | 1.74 | up | 0.01 |
| 221 | NM_001256055       | 1E+08  | Eif3j2          | -2.17 | down | 0.01 | 1.63 | up | 0.01 |
| 222 | NM_007874          | 13476  | Reep5           | -2.17 | down | 0.00 | 1.41 | up | 0.04 |
| 223 | NM_025992          | 67138  | Herc6           | -2.16 | down | 0.00 | 1.57 | up | 0.01 |
| 224 | NM_007597          | 12330  | Canx            | -2.16 | down | 0.00 | 1.44 | up | 0.02 |
| 225 | XM_006503340       | 67770  | Caap1           | -2.16 | down | 0.01 | 1.51 | up | 0.01 |
| 226 | ENSMUST00000120745 |        |                 | -2.16 | down | 0.00 | 1.59 | up | 0.01 |
| 227 | NM_019570          | 56210  | Rev1            | -2.16 | down | 0.00 | 1.94 | up | 0.03 |
| 228 | NM_011129          | 18952  | 43712           | -2.16 | down | 0.00 | 1.39 | up | 0.01 |
| 229 | NM_025825          | 66884  | Appbp2          | -2.16 | down | 0.00 | 1.58 | up | 0.01 |
| 230 | NM_023233          | 66597  | Trim13          | -2.16 | down | 0.00 | 1.69 | up | 0.01 |
| 231 | NM_026654          | 68276  | Toe1            | -2.16 | down | 0.00 | 1.93 | up | 0.01 |
| 232 | NM_008303          | 15528  | Hspe1           | -2.16 | down | 0.02 | 1.69 | up | 0.04 |
| 233 | NM_020283          | 26877  | B3galt1         | -2.16 | down | 0.00 | 1.65 | up | 0.00 |
| 234 | ENSMUST00000120090 |        |                 | -2.15 | down | 0.00 | 1.88 | up | 0.00 |
| 235 | ENSMUST00000182000 |        |                 | -2.15 | down | 0.00 | 1.69 | up | 0.00 |
| 236 | ENSMUST00000120408 |        |                 | -2.15 | down | 0.00 | 1.81 | up | 0.05 |
| 237 | XM_011251171       | 732521 | Gt(pU21)140Imeg | -2.15 | down | 0.00 | 1.79 | up | 0.01 |
| 238 | NM_031165          | 15481  | Hspa8           | -2.15 | down | 0.01 | 1.75 | up | 0.05 |
| 239 | NM_001015099       | 217558 | G2e3            | -2.15 | down | 0.01 | 1.56 | up | 0.03 |
| 240 | NM_011976          | 26456  | Sema4g          | -2.14 | down | 0.01 | 1.86 | up | 0.03 |
| 241 | NM_175226          | 75841  | Rnf139          | -2.14 | down | 0.00 | 1.94 | up | 0.01 |
| 242 | ENSMUST00000117894 |        |                 | -2.14 | down | 0.00 | 1.85 | up | 0.00 |

|     |                    |        |                |       |      |      |      |    |      |
|-----|--------------------|--------|----------------|-------|------|------|------|----|------|
| 243 | NM_009261          | 20744  | Strbp          | -2.14 | down | 0.00 | 1.75 | up | 0.00 |
| 244 | NM_001081688       | 432478 | Tmprss9        | -2.14 | down | 0.00 | 1.63 | up | 0.00 |
| 245 | AK214641           |        |                | -2.14 | down | 0.04 | 1.99 | up | 0.03 |
| 246 | NM_010914          | 18045  | Nfyb           | -2.14 | down | 0.00 | 1.23 | up | 0.04 |
| 247 | ENSMUST00000119165 |        |                | -2.14 | down | 0.00 | 1.80 | up | 0.01 |
| 248 | NAP095021-001      |        |                | -2.14 | down | 0.00 | 1.71 | up | 0.02 |
| 249 | NM_153780          | 72139  | 2610044O15Rik8 | -2.14 | down | 0.01 | 1.87 | up | 0.02 |
| 250 | NM_173746          | 208820 | Triqk          | -2.14 | down | 0.00 | 1.83 | up | 0.03 |
| 251 | NM_133231          | 170767 | Rfxap          | -2.14 | down | 0.00 | 1.66 | up | 0.01 |
| 252 | NM_001001798       | 320940 | Atp11c         | -2.13 | down | 0.01 | 1.88 | up | 0.02 |
| 253 | NM_008505          | 16909  | Lmo2           | -2.13 | down | 0.01 | 1.82 | up | 0.04 |
| 254 | NM_024438          | 68082  | Dusp19         | -2.13 | down | 0.00 | 1.85 | up | 0.02 |
| 255 | NM_001081222       | 77805  | Esco1          | -2.13 | down | 0.00 | 1.70 | up | 0.01 |
| 256 | NM_145934          | 106766 | Stap2          | -2.13 | down | 0.01 | 1.65 | up | 0.01 |
| 257 | NM_027326          | 70122  | Mllt3          | -2.13 | down | 0.00 | 1.78 | up | 0.00 |
| 258 | NM_025359          | 66109  | Tspan13        | -2.13 | down | 0.00 | 1.59 | up | 0.01 |
| 259 | NM_027182          | 69716  | Trip13         | -2.13 | down | 0.00 | 1.75 | up | 0.01 |
| 260 | NM_201244          | 54161  | Copg1          | -2.13 | down | 0.02 | 1.84 | up | 0.03 |
| 261 | CA579447           |        |                | -2.13 | down | 0.00 | 1.58 | up | 0.04 |
| 262 | ENSMUST00000161974 |        |                | -2.13 | down | 0.00 | 1.73 | up | 0.02 |
| 263 | NM_030081          | 78287  | Rbsn           | -2.12 | down | 0.00 | 1.94 | up | 0.02 |
| 264 | NM_080456          | 121022 | Mrps6          | -2.12 | down | 0.02 | 1.68 | up | 0.03 |
| 265 | AK172004           | 494504 | Apcdd1         | -2.12 | down | 0.00 | 1.85 | up | 0.03 |
| 266 | ENSMUST00000188847 | 213109 | Phf3           | -2.12 | down | 0.00 | 1.52 | up | 0.03 |
| 267 | NM_147113          | 259117 | Olfir560       | -2.12 | down | 0.00 | 1.65 | up | 0.02 |
| 268 | AK148702           |        |                | -2.12 | down | 0.01 | 1.78 | up | 0.01 |
| 269 | NM_028932          | 74427  | Eaf1           | -2.12 | down | 0.00 | 1.59 | up | 0.03 |
| 270 | NM_008452          | 16598  | Klf2           | -2.12 | down | 0.00 | 1.40 | up | 0.01 |
| 271 | NM_009952          | 12912  | Creb1          | -2.12 | down | 0.00 | 1.36 | up | 0.04 |
| 272 | XM_006534635       | 1E+08  | LOC102632383   | -2.12 | down | 0.00 | 1.34 | up | 0.01 |
| 273 | NM_007857          | 13363  | Dhh            | -2.12 | down | 0.00 | 1.34 | up | 0.01 |

|     |                    |        |               |       |      |      |      |    |      |
|-----|--------------------|--------|---------------|-------|------|------|------|----|------|
| 274 | NM_011277          | 19821  | Rnf2          | -2.12 | down | 0.01 | 1.68 | up | 0.04 |
| 275 | NM_001025373       | 74670  | Zfp943        | -2.12 | down | 0.00 | 1.83 | up | 0.00 |
| 276 | ENSMUST00000153501 |        |               | -2.12 | down | 0.01 | 1.93 | up | 0.01 |
| 277 | NM_001039521       | 106298 | Rrn3          | -2.12 | down | 0.00 | 1.70 | up | 0.00 |
| 278 | NM_133167          | 170736 | Parvb         | -2.11 | down | 0.04 | 1.78 | up | 0.03 |
| 279 | NM_019865          | 19982  | Rpl36a        | -2.11 | down | 0.00 | 1.46 | up | 0.02 |
| 280 | AK155848           | 70449  | 2610209C05Rik | -2.11 | down | 0.00 | 1.48 | up | 0.01 |
| 281 | ENSMUST00000087143 | 66235  | Eif1ax        | -2.11 | down | 0.00 | 1.54 | up | 0.01 |
| 282 | NM_019721          | 56335  | Mettl3        | -2.11 | down | 0.00 | 1.70 | up | 0.03 |
| 283 | NM_026054          | 67246  | 2810474O19Rik | -2.11 | down | 0.00 | 1.78 | up | 0.01 |
| 284 | ENSMUST00000118547 |        |               | -2.11 | down | 0.00 | 1.61 | up | 0.02 |
| 285 | NM_028110          | 72121  | Dennd2d       | -2.11 | down | 0.01 | 1.73 | up | 0.03 |
| 286 | NAP115053-1        |        |               | -2.11 | down | 0.00 | 1.48 | up | 0.03 |
| 287 | NM_007604          | 12343  | Capza2        | -2.11 | down | 0.00 | 1.68 | up | 0.00 |
| 288 | NM_013834          | 20377  | Sfrp1         | -2.11 | down | 0.00 | 1.44 | up | 0.03 |
| 289 | NM_173181          | 67306  | Zc2hc1a       | -2.11 | down | 0.00 | 1.95 | up | 0.02 |
| 290 | NAP059691-1        |        |               | -2.11 | down | 0.00 | 1.70 | up | 0.01 |
| 291 | AF369981           | 19042  | Ppm1a         | -2.11 | down | 0.00 | 1.64 | up | 0.03 |
| 292 | AK162394           | 21391  | Tbxas1        | -2.10 | down | 0.04 | 1.46 | up | 0.03 |
| 293 | NM_001199956       | 408192 | Gm9839        | -2.10 | down | 0.00 | 1.40 | up | 0.02 |
| 294 | XM_006540799       | 22215  | Ube3a         | -2.10 | down | 0.00 | 1.71 | up | 0.02 |
| 295 | NM_001024846       | 22720  | Zfp62         | -2.10 | down | 0.00 | 1.51 | up | 0.00 |
| 296 | NM_010849          | 17869  | Myc           | -2.10 | down | 0.01 | 1.79 | up | 0.00 |
| 297 | XM_006543383       | 328825 | Gm5093        | -2.10 | down | 0.00 | 1.67 | up | 0.01 |
| 298 | NM_001271016       | 66799  | Ube2w         | -2.10 | down | 0.00 | 1.60 | up | 0.01 |
| 299 | NM_145969          | 211922 | Dennd6a       | -2.10 | down | 0.00 | 1.44 | up | 0.04 |
| 300 | NM_146249          | 240120 | Zfp119b       | -2.10 | down | 0.00 | 1.52 | up | 0.01 |
| 301 | NM_026479          | 67966  | Zcchc10       | -2.10 | down | 0.00 | 1.65 | up | 0.02 |
| 302 | NM_029271          | 75398  | Mrpl32        | -2.10 | down | 0.00 | 1.87 | up | 0.03 |
| 303 | NM_025901          | 67005  | Polr3k        | -2.10 | down | 0.00 | 1.85 | up | 0.00 |
| 304 | NM_176962          | 319615 | Zfp944        | -2.10 | down | 0.00 | 1.74 | up | 0.01 |

|     |                    |        |          |       |      |      |      |    |      |
|-----|--------------------|--------|----------|-------|------|------|------|----|------|
| 305 | ENSMUST00000134741 | 224902 | Safb2    | -2.09 | down | 0.00 | 1.65 | up | 0.01 |
| 306 | NM_023210          | 66471  | Anp32e   | -2.09 | down | 0.00 | 1.98 | up | 0.00 |
| 307 | NM_029434          | 75782  | Lca5     | -2.09 | down | 0.00 | 2.00 | up | 0.01 |
| 308 | NM_001164593       | 239618 | Pdzrn4   | -2.09 | down | 0.03 | 1.75 | up | 0.03 |
| 309 | ENSMUST00000080175 |        |          | -2.09 | down | 0.00 | 1.79 | up | 0.02 |
| 310 | NM_021326          | 57782  | Rbak     | -2.09 | down | 0.00 | 1.82 | up | 0.04 |
| 311 | NM_001081420       | 230234 | Fam206a  | -2.09 | down | 0.00 | 1.82 | up | 0.00 |
| 312 | NM_001290548       | 320267 | Fubp3    | -2.09 | down | 0.00 | 1.82 | up | 0.00 |
| 313 | NM_016957          | 15331  | Hmgn2    | -2.09 | down | 0.01 | 1.87 | up | 0.02 |
| 314 | NM_009716          | 11911  | Atf4     | -2.09 | down | 0.00 | 1.30 | up | 0.01 |
| 315 | NM_028487          | 73274  | Gpbp1    | -2.09 | down | 0.00 | 1.68 | up | 0.00 |
| 316 | NM_178379          | 70383  | Cox10    | -2.09 | down | 0.00 | 1.76 | up | 0.01 |
| 317 | AK201505           | 104175 | Sbk1     | -2.09 | down | 0.00 | 1.82 | up | 0.01 |
| 318 | AK132208           | 20042  | Rps12    | -2.09 | down | 0.00 | 1.55 | up | 0.02 |
| 319 | XM_006529444       | 226442 | Zfp281   | -2.09 | down | 0.01 | 1.30 | up | 0.00 |
| 320 | NM_001177525       | 1E+08  | EU599041 | -2.09 | down | 0.01 | 1.96 | up | 0.01 |
| 321 | NM_001001932       | 216238 | Eea1     | -2.08 | down | 0.00 | 1.75 | up | 0.01 |
| 322 | NM_009087          | 20018  | Polr1d   | -2.08 | down | 0.00 | 1.68 | up | 0.00 |
| 323 | XM_006515438       | 11855  | Arhgap5  | -2.08 | down | 0.00 | 1.43 | up | 0.01 |
| 324 | ENSMUST00000093546 |        |          | -2.08 | down | 0.00 | 1.46 | up | 0.02 |
| 325 | NM_178069          | 224092 | Lsg1     | -2.08 | down | 0.01 | 1.84 | up | 0.01 |
| 326 | NM_172586          | 218100 | Zfp322a  | -2.08 | down | 0.00 | 1.49 | up | 0.03 |
| 327 | NM_001164676       | 381067 | Zfp229   | -2.08 | down | 0.01 | 1.70 | up | 0.01 |
| 328 | NM_010288          | 14609  | Gja1     | -2.08 | down | 0.02 | 1.55 | up | 0.01 |
| 329 | NM_177715          | 239217 | Kctd12   | -2.08 | down | 0.01 | 1.85 | up | 0.05 |
| 330 | NM_029570          | 76295  | Atp11b   | -2.08 | down | 0.00 | 1.39 | up | 0.02 |
| 331 | NM_009946          | 12890  | Cplx2    | -2.08 | down | 0.01 | 1.80 | up | 0.01 |
| 332 | ENSMUST00000119605 |        |          | -2.08 | down | 0.00 | 1.83 | up | 0.00 |
| 333 | AK034948           | 67712  | Slc25a37 | -2.08 | down | 0.02 | 1.84 | up | 0.04 |
| 334 | XM_006522805       | 433003 | Gm5481   | -2.08 | down | 0.00 | 1.34 | up | 0.03 |
| 335 | NM_133774          | 170459 | Stard4   | -2.08 | down | 0.01 | 1.65 | up | 0.04 |

|     |                    |        |           |       |      |      |      |    |      |
|-----|--------------------|--------|-----------|-------|------|------|------|----|------|
| 336 | ENSMUST00000118023 |        |           | -2.07 | down | 0.01 | 1.75 | up | 0.00 |
| 337 | NM_172833          | 240354 | Malt1     | -2.07 | down | 0.00 | 1.81 | up | 0.02 |
| 338 | NM_009881          | 12593  | Cdyl      | -2.07 | down | 0.01 | 1.76 | up | 0.02 |
| 339 | NM_001033348       | 241694 | Ralgapa2  | -2.07 | down | 0.00 | 1.42 | up | 0.00 |
| 340 | NM_001079830       | 94093  | Trim33    | -2.07 | down | 0.00 | 1.53 | up | 0.01 |
| 341 | AK040904           | 1E+08  | Gm26510   | -2.07 | down | 0.00 | 1.37 | up | 0.04 |
| 342 | NM_025970          | 67106  | Zbtb8os   | -2.07 | down | 0.00 | 1.73 | up | 0.01 |
| 343 | AK040596           |        |           | -2.07 | down | 0.00 | 1.28 | up | 0.04 |
| 344 | ENSMUST00000178086 |        |           | -2.07 | down | 0.00 | 1.69 | up | 0.01 |
| 345 | NM_025885          | 381379 | Med19     | -2.07 | down | 0.00 | 1.85 | up | 0.01 |
| 346 | NM_080558          | 70599  | Ssfa2     | -2.07 | down | 0.00 | 1.81 | up | 0.02 |
| 347 | NM_011643          | 22063  | Trpc1     | -2.07 | down | 0.01 | 1.56 | up | 0.02 |
| 348 | XM_006495473       | 19888  | Rp1       | -2.07 | down | 0.03 | 1.65 | up | 0.05 |
| 349 | AK048998           | 382421 | Gm5176    | -2.07 | down | 0.00 | 1.38 | up | 0.05 |
| 350 | NM_028334          | 69736  | Nup37     | -2.07 | down | 0.00 | 1.84 | up | 0.01 |
| 351 | NM_024242          | 71340  | Riok1     | -2.06 | down | 0.00 | 1.70 | up | 0.01 |
| 352 | NM_001111320       | 15926  | Idh1      | -2.06 | down | 0.00 | 1.98 | up | 0.00 |
| 353 | NM_001025572       | 106585 | Ankrd12   | -2.06 | down | 0.00 | 1.70 | up | 0.05 |
| 354 | NM_144787          | 76804  | Kdm4c     | -2.06 | down | 0.00 | 1.64 | up | 0.01 |
| 355 | NM_001289781       | 78697  | Pus7      | -2.06 | down | 0.04 | 1.51 | up | 0.04 |
| 356 | NM_007638          | 12468  | Cct7      | -2.06 | down | 0.00 | 1.43 | up | 0.02 |
| 357 | NM_194269          | 378462 | Morn2     | -2.06 | down | 0.01 | 1.91 | up | 0.00 |
| 358 | NM_212457          | 406217 | Bex4      | -2.06 | down | 0.00 | 1.75 | up | 0.03 |
| 359 | NM_133818          | 98404  | AI597479  | -2.06 | down | 0.00 | 1.88 | up | 0.01 |
| 360 | NM_009831          | 12450  | Ceng1     | -2.06 | down | 0.00 | 1.69 | up | 0.02 |
| 361 | NM_145455          | 218490 | Btf3      | -2.06 | down | 0.00 | 1.68 | up | 0.01 |
| 362 | NM_153319          | 27494  | Amot      | -2.06 | down | 0.01 | 1.80 | up | 0.03 |
| 363 | NM_001199350       | 619547 | Rpl34-ps1 | -2.06 | down | 0.00 | 1.56 | up | 0.03 |
| 364 | NM_026536          | 68055  | Atp5s     | -2.05 | down | 0.00 | 1.80 | up | 0.00 |
| 365 | NAP113774-1        |        |           | -2.05 | down | 0.00 | 1.71 | up | 0.01 |
| 366 | NM_177712          | 238692 | Zfp874a   | -2.05 | down | 0.01 | 1.73 | up | 0.02 |

|     |                    |        |               |       |      |      |      |    |      |
|-----|--------------------|--------|---------------|-------|------|------|------|----|------|
| 367 | NM_172865          | 242362 | Manea         | -2.05 | down | 0.00 | 1.82 | up | 0.00 |
| 368 | NM_001170454       | 231151 | Tada2b        | -2.05 | down | 0.00 | 1.70 | up | 0.01 |
| 369 | ENSMUST00000121467 |        |               | -2.05 | down | 0.00 | 1.82 | up | 0.00 |
| 370 | NM_001170849       | 192196 | Luc7l2        | -2.05 | down | 0.00 | 1.54 | up | 0.02 |
| 371 | NM_027617          | 70951  | Spata1        | -2.05 | down | 0.00 | 1.78 | up | 0.00 |
| 372 | NM_178766          | 319653 | Slc25a40      | -2.05 | down | 0.00 | 1.67 | up | 0.01 |
| 373 | NM_001024910       | 103080 | 43718         | -2.05 | down | 0.00 | 1.70 | up | 0.00 |
| 374 | ENSMUST00000141874 | 20402  | Zfp106        | -2.05 | down | 0.01 | 1.84 | up | 0.03 |
| 375 | NM_009256          | 20723  | Serpinb9      | -2.05 | down | 0.01 | 1.73 | up | 0.02 |
| 376 | NM_029610          | 73919  | Lymr1         | -2.05 | down | 0.00 | 1.79 | up | 0.00 |
| 377 | NM_177039          | 319942 | A530016L24Rik | -2.05 | down | 0.00 | 1.23 | up | 0.01 |
| 378 | NAP111293-1        |        |               | -2.05 | down | 0.00 | 1.89 | up | 0.00 |
| 379 | NM_028677          | 66101  | Ppnh          | -2.05 | down | 0.01 | 1.85 | up | 0.04 |
| 380 | NM_001289658       | 76223  | Agbl3         | -2.05 | down | 0.00 | 1.93 | up | 0.02 |
| 381 | NM_028990          | 101118 | Tmem168       | -2.05 | down | 0.00 | 1.75 | up | 0.01 |
| 382 | NM_031391          | 83602  | Gtf2a1        | -2.05 | down | 0.00 | 1.57 | up | 0.02 |
| 383 | NM_001081090       | 66580  | Esf1          | -2.05 | down | 0.00 | 1.61 | up | 0.00 |
| 384 | NM_133740          | 71974  | Prmt3         | -2.05 | down | 0.00 | 1.91 | up | 0.03 |
| 385 | NM_007552          | 12151  | Bmi1          | -2.04 | down | 0.00 | 1.80 | up | 0.02 |
| 386 | NM_027203          | 69757  | Leng1         | -2.04 | down | 0.00 | 1.79 | up | 0.01 |
| 387 | NM_133895          | 100561 | Slc15a4       | -2.04 | down | 0.00 | 1.30 | up | 0.03 |
| 388 | NM_028319          | 72672  | Zfp518a       | -2.04 | down | 0.00 | 1.37 | up | 0.05 |
| 389 | XM_006527909       | 19108  | Prkx          | -2.04 | down | 0.01 | 1.98 | up | 0.00 |
| 390 | XM_006540002       | 26436  | Psg16         | -2.04 | down | 0.00 | 1.82 | up | 0.03 |
| 391 | NM_001001176       | 407786 | Taf9b         | -2.04 | down | 0.00 | 1.78 | up | 0.03 |
| 392 | NM_013843          | 24132  | Zfp53         | -2.04 | down | 0.00 | 1.93 | up | 0.00 |
| 393 | TC1602431          |        |               | -2.04 | down | 0.00 | 1.42 | up | 0.01 |
| 394 | NM_020595          | 57329  | Otor          | -2.04 | down | 0.00 | 1.42 | up | 0.02 |
| 395 | XM_006505459       | 12444  | Ccnd2         | -2.04 | down | 0.00 | 1.69 | up | 0.02 |
| 396 | NM_007890          | 13548  | Dyrk1a        | -2.04 | down | 0.00 | 1.59 | up | 0.01 |
| 397 | NM_008186          | 14884  | Gtf2h1        | -2.04 | down | 0.01 | 1.97 | up | 0.02 |

|     |                    |        |               |       |      |      |      |    |      |
|-----|--------------------|--------|---------------|-------|------|------|------|----|------|
| 398 | NM_152234          | 56085  | Ubqln1        | -2.04 | down | 0.00 | 1.34 | up | 0.01 |
| 399 | XM_006515301       | 1E+08  | Gm29738       | -2.03 | down | 0.01 | 1.56 | up | 0.02 |
| 400 | NM_027807          | 75717  | Cul5          | -2.03 | down | 0.00 | 1.64 | up | 0.01 |
| 401 | NM_026046          | 67230  | Zfp329        | -2.03 | down | 0.00 | 1.19 | up | 0.03 |
| 402 | NM_001080706       | 107182 | Btaf1         | -2.03 | down | 0.01 | 1.59 | up | 0.04 |
| 403 | NM_173761          | 228994 | Ythdf1        | -2.03 | down | 0.00 | 1.54 | up | 0.01 |
| 404 | ENSMUST00000147830 | 17763  | Mtcp1         | -2.03 | down | 0.02 | 1.42 | up | 0.02 |
| 405 | NM_079835          | 547431 | Btnl2         | -2.03 | down | 0.01 | 1.97 | up | 0.01 |
| 406 | NM_025776          | 66810  | Rbm22         | -2.03 | down | 0.00 | 1.90 | up | 0.03 |
| 407 | NM_053155          | 94040  | Clmn          | -2.03 | down | 0.04 | 1.75 | up | 0.00 |
| 408 | NM_001122675       | 227449 | Zcchc2        | -2.03 | down | 0.00 | 1.59 | up | 0.05 |
| 409 | NM_013778          | 27384  | Akr1c13       | -2.03 | down | 0.02 | 1.86 | up | 0.01 |
| 410 | NM_001162921       | 244871 | Zc3h12c       | -2.03 | down | 0.00 | 1.99 | up | 0.00 |
| 411 | NM_172645          | 226551 | Suco          | -2.03 | down | 0.00 | 1.88 | up | 0.01 |
| 412 | NM_011794          | 23827  | Bpnt1         | -2.03 | down | 0.00 | 1.61 | up | 0.03 |
| 413 | NM_028626          | 73724  | Mcee          | -2.03 | down | 0.01 | 1.88 | up | 0.02 |
| 414 | ENSMUST00000119137 |        |               | -2.03 | down | 0.00 | 1.65 | up | 0.00 |
| 415 | NM_029330          | 75540  | Fpgt          | -2.03 | down | 0.00 | 1.70 | up | 0.03 |
| 416 | NM_054087          | 116914 | Slc19a2       | -2.03 | down | 0.00 | 1.54 | up | 0.03 |
| 417 | NM_029505          | 64933  | Ap3m2         | -2.02 | down | 0.01 | 1.83 | up | 0.01 |
| 418 | NM_025564          | 66441  | Magohb        | -2.02 | down | 0.00 | 1.89 | up | 0.02 |
| 419 | XM_006523251       | 68842  | Tulp4         | -2.02 | down | 0.00 | 1.64 | up | 0.00 |
| 420 | NM_001177750       | 1E+08  | Gm10767       | -2.02 | down | 0.00 | 1.58 | up | 0.02 |
| 421 | NM_001290196       | 76803  | 2410141K09Rik | -2.02 | down | 0.00 | 1.46 | up | 0.03 |
| 422 | NM_001081193       | 380664 | Lemd3         | -2.02 | down | 0.00 | 1.73 | up | 0.01 |
| 423 | NM_001127189       | 1E+08  | Gm13157       | -2.02 | down | 0.00 | 1.58 | up | 0.01 |
| 424 | NM_001008421       | 217431 | Nol10         | -2.02 | down | 0.00 | 1.75 | up | 0.04 |
| 425 | NM_009466          | 22235  | Ugdh          | -2.02 | down | 0.00 | 1.56 | up | 0.02 |
| 426 | NM_181322          | 13018  | Ctcf          | -2.02 | down | 0.00 | 1.76 | up | 0.01 |
| 427 | ENSMUST00000181799 |        |               | -2.02 | down | 0.00 | 1.59 | up | 0.00 |
| 428 | AK042006           | 77766  | Elp4          | -2.02 | down | 0.01 | 1.43 | up | 0.01 |

|     |                    |        |          |       |      |      |      |    |      |
|-----|--------------------|--------|----------|-------|------|------|------|----|------|
| 429 | NM_175028          | 240442 | Adnp2    | -2.02 | down | 0.00 | 1.33 | up | 0.04 |
| 430 | NM_029606          | 76380  | Cep112   | -2.02 | down | 0.00 | 1.77 | up | 0.01 |
| 431 | NM_020588          | 57439  | Tmem183a | -2.02 | down | 0.01 | 1.99 | up | 0.01 |
| 432 | NM_030261          | 75747  | Sesn3    | -2.02 | down | 0.00 | 1.99 | up | 0.00 |
| 433 | NM_026246          | 18120  | Mrpl49   | -2.01 | down | 0.00 | 1.88 | up | 0.01 |
| 434 | NM_025800          | 66849  | Ppp1r2   | -2.01 | down | 0.00 | 1.77 | up | 0.02 |
| 435 | ENSMUST00000091097 |        |          | -2.01 | down | 0.00 | 1.36 | up | 0.02 |
| 436 | NM_172854          | 241327 | Olfml2a  | -2.01 | down | 0.01 | 1.72 | up | 0.04 |
| 437 | NM_013703          | 22359  | Vldlr    | -2.01 | down | 0.00 | 1.56 | up | 0.04 |
| 438 | ENSMUST00000029106 | 72147  | Zbtb46   | -2.01 | down | 0.00 | 1.51 | up | 0.03 |
| 439 | ENSMUST00000119351 |        |          | -2.01 | down | 0.00 | 1.38 | up | 0.02 |
| 440 | NM_001038015       | 67980  | Gnpda2   | -2.01 | down | 0.00 | 1.74 | up | 0.01 |
| 441 | ENSMUST00000121873 |        |          | -2.01 | down | 0.00 | 1.62 | up | 0.00 |
| 442 | NM_025682          | 66645  | Pspc1    | -2.01 | down | 0.00 | 1.28 | up | 0.02 |
| 443 | ENSMUST00000071770 |        |          | -2.01 | down | 0.00 | 1.58 | up | 0.03 |
| 444 | NM_078477          | 118445 | Klf16    | -2.01 | down | 0.02 | 1.63 | up | 0.01 |
| 445 | NM_013673          | 20684  | Sp100    | -2.01 | down | 0.01 | 1.54 | up | 0.04 |
| 446 | NM_001167885       | 225888 | Suv420h1 | -2.01 | down | 0.00 | 1.52 | up | 0.03 |
| 447 | NM_033564          | 93734  | Mpv171   | -2.01 | down | 0.00 | 1.82 | up | 0.01 |
| 448 | NM_001001185       | 408058 | BC048507 | -2.01 | down | 0.01 | 1.71 | up | 0.03 |
| 449 | NAP095730-001      |        |          | -2.01 | down | 0.00 | 1.69 | up | 0.01 |
| 450 | NM_009879          | 12589  | Ift81    | -2.01 | down | 0.00 | 1.65 | up | 0.00 |
| 451 | NM_011134          | 18979  | Pon1     | -2.01 | down | 0.05 | 2.00 | up | 0.04 |
| 452 | NM_175515          | 380614 | Intu     | -2.01 | down | 0.01 | 1.63 | up | 0.02 |
| 453 | NM_029512          | 76080  | Ttpal    | -2.01 | down | 0.00 | 1.62 | up | 0.01 |
| 454 | NM_001160399       | 240261 | Ccdc112  | -2.01 | down | 0.01 | 1.73 | up | 0.03 |
| 455 | ENSMUST00000121247 |        |          | -2.01 | down | 0.00 | 1.81 | up | 0.01 |
| 456 | NM_133832          | 98711  | Rdh10    | -2.00 | down | 0.00 | 1.66 | up | 0.01 |
| 457 | NM_026055          | 67248  | Rpl39    | -2.00 | down | 0.00 | 1.45 | up | 0.03 |
| 458 | NM_172054          | 98258  | Txndc9   | -2.00 | down | 0.00 | 1.47 | up | 0.00 |
| 459 | NM_001044386       | 22764  | Zfx      | -2.00 | down | 0.00 | 1.50 | up | 0.02 |



|     |                    |        |               |       |      |      |       |      |      |
|-----|--------------------|--------|---------------|-------|------|------|-------|------|------|
| 460 | NM_026503          | 68002  | Sdhaf4        | -2.00 | down | 0.00 | 1.66  | up   | 0.03 |
| 461 | NM_001081680       | 238722 | Zfp72         | -2.00 | down | 0.00 | 1.71  | up   | 0.02 |
| 462 | ENSMUST00000163337 |        |               | -2.00 | down | 0.00 | 1.41  | up   | 0.02 |
| 463 | NM_011508          | 20918  | Eif1          | -2.00 | down | 0.00 | 1.65  | up   | 0.01 |
| 464 | AK139740           |        |               | -2.00 | down | 0.00 | 1.61  | up   | 0.00 |
| 465 | NM_001033422       | 331401 | Thoc2         | -2.00 | down | 0.00 | 1.31  | up   | 0.02 |
| 466 | NM_175025          | 235574 | Atp2c1        | -2.00 | down | 0.00 | 1.63  | up   | 0.00 |
| 467 | NM_001083927       | 21887  | Tle3          | -2.00 | down | 0.02 | 1.65  | up   | 0.02 |
| 468 | NM_010085          | 13525  | Adam26a       | 2.00  | up   | 0.00 | -1.40 | down | 0.01 |
| 469 | NM_001080934       | 217316 | Slc16a5       | 2.00  | up   | 0.00 | -1.56 | down | 0.02 |
| 470 | ENSMUST00000127159 | 78656  | Brd8          | 2.00  | up   | 0.00 | -1.96 | down | 0.00 |
| 471 | NM_147003          | 259005 | Olfir139      | 2.00  | up   | 0.00 | -1.48 | down | 0.03 |
| 472 | NM_146453          | 258445 | Olfir693      | 2.01  | up   | 0.05 | -1.89 | down | 0.00 |
| 473 | NM_001002896       | 107993 | Bfsp2         | 2.01  | up   | 0.00 | -1.56 | down | 0.00 |
| 474 | NM_001159775       | 258236 | Olfir391-ps   | 2.02  | up   | 0.00 | -1.86 | down | 0.00 |
| 475 | NM_007439          | 11682  | Alk           | 2.02  | up   | 0.00 | -1.46 | down | 0.02 |
| 476 | NM_001113187       | 98582  | Khdc1b        | 2.02  | up   | 0.00 | -1.45 | down | 0.01 |
| 477 | NM_010929          | 18132  | Notch4        | 2.02  | up   | 0.00 | -1.81 | down | 0.01 |
| 478 | NM_027442          | 70503  | Ddo           | 2.02  | up   | 0.00 | -1.65 | down | 0.00 |
| 479 | AK047978           | 414118 | Zmiz1os1      | 2.02  | up   | 0.00 | -1.55 | down | 0.00 |
| 480 | NM_029689          | 76651  | 1700122O11Rik | 2.02  | up   | 0.00 | -1.63 | down | 0.01 |
| 481 | AK089900           | 78610  | Uvrag         | 2.02  | up   | 0.00 | -1.71 | down | 0.01 |
| 482 | AK087460           |        |               | 2.02  | up   | 0.00 | -1.80 | down | 0.00 |
| 483 | ENSMUST00000029440 | 99543  | Olfml3        | 2.02  | up   | 0.00 | -1.55 | down | 0.01 |
| 484 | NM_008435          | 16538  | Kcns1         | 2.03  | up   | 0.00 | -1.76 | down | 0.00 |
| 485 | AK031474           | 382062 | AB124611      | 2.03  | up   | 0.00 | -1.50 | down | 0.00 |
| 486 | AK007903           | 69818  | 1810059C17Rik | 2.03  | up   | 0.00 | -1.89 | down | 0.00 |
| 487 | NM_017461          | 54204  | 43709         | 2.03  | up   | 0.00 | -1.52 | down | 0.01 |
| 488 | NM_026685          | 68344  | Tmem174       | 2.03  | up   | 0.00 | -1.76 | down | 0.01 |
| 489 | ENSMUST00000130479 | 319845 | Bbs9          | 2.03  | up   | 0.00 | -1.39 | down | 0.02 |
| 490 | AK029733           | 666539 | Gm8154        | 2.04  | up   | 0.00 | -1.55 | down | 0.01 |

|     |                    |        |               |      |    |      |       |      |      |
|-----|--------------------|--------|---------------|------|----|------|-------|------|------|
| 491 | NM_173070          | 229562 | Sprr4         | 2.04 | up | 0.01 | -1.73 | down | 0.00 |
| 492 | ENSMUST00000145908 | 330222 | Sdk1          | 2.04 | up | 0.00 | -1.93 | down | 0.00 |
| 493 | AK034480           |        |               | 2.04 | up | 0.02 | -1.79 | down | 0.01 |
| 494 | NM_009987          | 13051  | Cx3cr1        | 2.04 | up | 0.00 | -1.73 | down | 0.02 |
| 495 | NM_013887          | 30044  | Opn4          | 2.04 | up | 0.00 | -1.69 | down | 0.00 |
| 496 | NM_026338          | 67722  | Actl11        | 2.04 | up | 0.01 | -1.70 | down | 0.00 |
| 497 | AK182364           | 11821  | Aprt          | 2.05 | up | 0.00 | -1.54 | down | 0.00 |
| 498 | NM_133204          | 170734 | Zscan5b       | 2.05 | up | 0.00 | -1.82 | down | 0.00 |
| 499 | NM_001101463       | 231885 | Gm4871        | 2.05 | up | 0.00 | -1.56 | down | 0.00 |
| 500 | NM_183224          | 329731 | Fam19a3       | 2.05 | up | 0.00 | -1.65 | down | 0.01 |
| 501 | NM_175280          | 78774  | Cfap61        | 2.05 | up | 0.00 | -1.78 | down | 0.01 |
| 502 | NM_026785          | 68612  | Ube2c         | 2.05 | up | 0.00 | -1.32 | down | 0.04 |
| 503 | AK082467           | 110333 | Rmst          | 2.05 | up | 0.00 | -1.72 | down | 0.01 |
| 504 | XM_006506255       | 320127 | Dgki          | 2.06 | up | 0.02 | -1.83 | down | 0.00 |
| 505 | NM_001289756       | 11814  | Apoc3         | 2.06 | up | 0.02 | -1.97 | down | 0.00 |
| 506 | NM_146833          | 258830 | Olfir103      | 2.06 | up | 0.00 | -1.44 | down | 0.00 |
| 507 | NM_021291          | 30962  | Slc7a9        | 2.07 | up | 0.00 | -1.86 | down | 0.00 |
| 508 | NM_009470          | 22242  | Umod          | 2.07 | up | 0.00 | -1.77 | down | 0.02 |
| 509 | NM_010057          | 13396  | Dlx6          | 2.07 | up | 0.01 | -1.45 | down | 0.02 |
| 510 | AA822459           |        |               | 2.07 | up | 0.00 | -1.61 | down | 0.01 |
| 511 | NM_032610          | 80297  | Sptbn4        | 2.07 | up | 0.00 | -1.78 | down | 0.01 |
| 512 | NM_144835          | 217995 | Heatr1        | 2.08 | up | 0.00 | -1.91 | down | 0.00 |
| 513 | BI661026           |        |               | 2.08 | up | 0.00 | -1.80 | down | 0.01 |
| 514 | NM_146600          | 258593 | Olfir700      | 2.08 | up | 0.00 | -1.59 | down | 0.04 |
| 515 | NM_011771          | 22780  | Ikzf3         | 2.08 | up | 0.01 | -1.94 | down | 0.00 |
| 516 | NM_009036          | 19668  | Rbpjl         | 2.08 | up | 0.02 | -1.50 | down | 0.00 |
| 517 | NM_133894          | 100559 | Ugt2b38       | 2.09 | up | 0.03 | -1.70 | down | 0.01 |
| 518 | NM_001293795       | 107770 | Tm6sf2        | 2.09 | up | 0.00 | -1.40 | down | 0.00 |
| 519 | AK131776           | 1E+08  | Gm40421       | 2.09 | up | 0.00 | -1.81 | down | 0.02 |
| 520 | NM_001145537       | 668433 | 4930544D05Rik | 2.09 | up | 0.00 | -1.53 | down | 0.00 |
| 521 | XM_006511606       | 1E+08  | Gm10634       | 2.09 | up | 0.00 | -1.48 | down | 0.01 |

|     |                    |        |               |      |    |      |       |      |      |
|-----|--------------------|--------|---------------|------|----|------|-------|------|------|
| 522 | NM_133254          | 246787 | Slc5a2        | 2.09 | up | 0.00 | -1.43 | down | 0.00 |
| 523 | NM_172550          | 216119 | Ybey          | 2.09 | up | 0.03 | -1.89 | down | 0.00 |
| 524 | NM_023670          | 140488 | Igf2bp3       | 2.09 | up | 0.05 | -1.59 | down | 0.00 |
| 525 | ENSMUST00000119243 |        |               | 2.09 | up | 0.02 | -1.73 | down | 0.02 |
| 526 | NM_025520          | 66373  | Lsm5          | 2.09 | up | 0.00 | -1.94 | down | 0.00 |
| 527 | BC107389           | 382913 | Neil2         | 2.10 | up | 0.00 | -1.33 | down | 0.01 |
| 528 | NM_010235          | 14283  | Fos11         | 2.10 | up | 0.00 | -1.81 | down | 0.00 |
| 529 | ENSMUST00000105802 | 15565  | Htr6          | 2.11 | up | 0.02 | -1.62 | down | 0.01 |
| 530 | ENSMUST00000103672 |        |               | 2.11 | up | 0.01 | -1.57 | down | 0.01 |
| 531 | NM_027024          | 69294  | Cst13         | 2.11 | up | 0.00 | -1.94 | down | 0.01 |
| 532 | NM_194268          | 225631 | Onecut2       | 2.11 | up | 0.02 | -1.51 | down | 0.05 |
| 533 | ENSMUST00000151328 | 17901  | My11          | 2.12 | up | 0.00 | -1.63 | down | 0.00 |
| 534 | ENSMUST00000186455 | 81907  | Tmem108       | 2.12 | up | 0.00 | -1.97 | down | 0.00 |
| 535 | NM_001029935       | 214158 | Trim38        | 2.12 | up | 0.00 | -1.53 | down | 0.01 |
| 536 | NM_010287          | 14608  | Gpr83         | 2.12 | up | 0.00 | -1.73 | down | 0.05 |
| 537 | ENSMUST00000120250 |        |               | 2.12 | up | 0.02 | -1.91 | down | 0.00 |
| 538 | NM_134193          | 171227 | Vmn1r232      | 2.12 | up | 0.03 | -1.80 | down | 0.04 |
| 539 | AK051890           | 791272 | Gm10091       | 2.13 | up | 0.00 | -1.66 | down | 0.00 |
| 540 | NM_007401          | 11499  | Adam5         | 2.13 | up | 0.00 | -1.57 | down | 0.00 |
| 541 | NM_025487          | 66322  | 1700011A15Rik | 2.13 | up | 0.00 | -1.48 | down | 0.05 |
| 542 | BF319608           |        |               | 2.13 | up | 0.00 | -1.81 | down | 0.00 |
| 543 | NM_027402          | 384061 | Fndc5         | 2.13 | up | 0.00 | -1.91 | down | 0.00 |
| 544 | XM_006497797       | 19730  | Ralgds        | 2.14 | up | 0.00 | -1.99 | down | 0.00 |
| 545 | AK040132           |        |               | 2.14 | up | 0.01 | -1.84 | down | 0.02 |
| 546 | ENSMUST00000127388 | 17756  | Map2          | 2.14 | up | 0.00 | -1.95 | down | 0.00 |
| 547 | NM_008665          | 17932  | Myt1          | 2.14 | up | 0.03 | -1.72 | down | 0.04 |
| 548 | ENSMUST00000107564 | 72324  | Plxdc1        | 2.14 | up | 0.00 | -1.48 | down | 0.04 |
| 549 | AK007031           | 73588  | St8sia3os     | 2.14 | up | 0.00 | -1.58 | down | 0.01 |
| 550 | NM_146904          | 57251  | Olfir870      | 2.15 | up | 0.00 | -1.64 | down | 0.00 |
| 551 | NM_001123367       | 1E+08  | Gm3448        | 2.15 | up | 0.00 | -1.85 | down | 0.00 |
| 552 | AK053272           | 1E+08  | Gm9963        | 2.15 | up | 0.00 | -1.76 | down | 0.00 |

|     |                    |        |                |      |    |      |       |      |      |
|-----|--------------------|--------|----------------|------|----|------|-------|------|------|
| 553 | AK171018           | 69305  | Dcps           | 2.16 | up | 0.00 | -1.86 | down | 0.00 |
| 554 | AK133420           | 12983  | Csf2rb         | 2.16 | up | 0.00 | -1.24 | down | 0.02 |
| 555 | NM_177354          | 238328 | Vash1          | 2.16 | up | 0.00 | -1.66 | down | 0.01 |
| 556 | NM_153519          | 213272 | Txndc2         | 2.16 | up | 0.00 | -1.80 | down | 0.00 |
| 557 | DV059070           | 109215 | Lncbate1       | 2.16 | up | 0.00 | -1.78 | down | 0.00 |
| 558 | NM_053118          | 93746  | Gprc5d         | 2.16 | up | 0.00 | -1.90 | down | 0.00 |
| 559 | NM_010824          | 17523  | Mpo            | 2.16 | up | 0.01 | -1.47 | down | 0.01 |
| 560 | NM_001081397       | 244281 | Myo16          | 2.16 | up | 0.00 | -1.41 | down | 0.01 |
| 561 | AK042193           | 320763 | A430034D21Rik  | 2.16 | up | 0.00 | -1.75 | down | 0.01 |
| 562 | XM_006535747       | 50791  | Magi2          | 2.16 | up | 0.00 | -1.38 | down | 0.02 |
| 563 | NM_013631          | 18770  | Pklr           | 2.17 | up | 0.00 | -1.37 | down | 0.00 |
| 564 | BC114968           | 59005  | Trappc2l       | 2.17 | up | 0.01 | -1.58 | down | 0.03 |
| 565 | AK154713           | 381680 | Nxpe5          | 2.17 | up | 0.01 | -1.78 | down | 0.00 |
| 566 | NM_009659          | 11686  | Alox12b        | 2.17 | up | 0.00 | -1.97 | down | 0.00 |
| 567 | NM_009602          | 11444  | Chrn2          | 2.17 | up | 0.01 | -2.00 | down | 0.00 |
| 568 | NM_199257          | 234129 | Tpte           | 2.17 | up | 0.00 | -1.53 | down | 0.01 |
| 569 | NM_028852          | 74281  | Spatc1         | 2.17 | up | 0.02 | -1.43 | down | 0.04 |
| 570 | AK217931           | 80987  | Nckipsd        | 2.17 | up | 0.00 | -1.85 | down | 0.00 |
| 571 | NM_001011814       | 258055 | Olfir524       | 2.17 | up | 0.00 | -1.84 | down | 0.00 |
| 572 | NM_008657          | 17878  | Myf6           | 2.17 | up | 0.04 | -1.33 | down | 0.01 |
| 573 | ENSMUST00000053635 |        |                | 2.18 | up | 0.00 | -1.51 | down | 0.00 |
| 574 | NM_008375          | 16204  | Fabp6          | 2.19 | up | 0.00 | -1.57 | down | 0.00 |
| 575 | NM_001114679       | 667214 | 9930111J21Rik1 | 2.19 | up | 0.00 | -1.95 | down | 0.00 |
| 576 | AK084558           |        |                | 2.19 | up | 0.00 | -1.85 | down | 0.01 |
| 577 | NM_007919          | 13706  | Cela2a         | 2.19 | up | 0.00 | -1.61 | down | 0.00 |
| 578 | NM_019474          | 29846  | Olfir156       | 2.19 | up | 0.01 | -1.97 | down | 0.00 |
| 579 | BC048482           | 27281  | Hrasls         | 2.19 | up | 0.00 | -1.93 | down | 0.00 |
| 580 | NM_008729          | 18163  | Ctnnd2         | 2.19 | up | 0.00 | -1.80 | down | 0.02 |
| 581 | BC042796           | 1E+08  | Gm32478        | 2.20 | up | 0.00 | -1.84 | down | 0.01 |
| 582 | NM_010299          | 14667  | Gm2a           | 2.20 | up | 0.03 | -1.91 | down | 0.00 |
| 583 | BC103784           | 633640 | Gm7120         | 2.20 | up | 0.00 | -1.64 | down | 0.04 |

|     |                    |        |               |      |    |      |       |      |      |
|-----|--------------------|--------|---------------|------|----|------|-------|------|------|
| 584 | NM_207235          | 227789 | Olfr358       | 2.21 | up | 0.00 | -1.92 | down | 0.00 |
| 585 | NM_008936          | 19127  | Prop1         | 2.21 | up | 0.00 | -1.88 | down | 0.00 |
| 586 | NM_207230          | 216783 | Olfr320       | 2.21 | up | 0.00 | -1.52 | down | 0.01 |
| 587 | NM_001013411       | 432450 | Nkain2        | 2.21 | up | 0.00 | -1.63 | down | 0.00 |
| 588 | ENSMUST00000143224 | 546134 | Gramd2        | 2.21 | up | 0.00 | -1.60 | down | 0.02 |
| 589 | ENSMUST00000088673 |        |               | 2.21 | up | 0.00 | -1.94 | down | 0.00 |
| 590 | NM_008353          | 16161  | Il12rb1       | 2.22 | up | 0.00 | -1.43 | down | 0.01 |
| 591 | NM_001029933       | 232966 | Zfp114        | 2.22 | up | 0.01 | -1.47 | down | 0.01 |
| 592 | NM_198106          | 208169 | Slc9c1        | 2.23 | up | 0.01 | -1.87 | down | 0.01 |
| 593 | ENSMUST00000100417 | 14055  | Ezh1          | 2.23 | up | 0.01 | -1.83 | down | 0.00 |
| 594 | NM_027908          | 71761  | Amdhd1        | 2.23 | up | 0.00 | -1.83 | down | 0.00 |
| 595 | NM_001085528       | 435791 | Gm13271       | 2.23 | up | 0.00 | -1.72 | down | 0.00 |
| 596 | AA267875           |        |               | 2.23 | up | 0.00 | -1.69 | down | 0.00 |
| 597 | AK019365           | 68191  | Taco1os       | 2.24 | up | 0.00 | -1.82 | down | 0.00 |
| 598 | NM_144810          | 213417 | Klhdc8a       | 2.24 | up | 0.02 | -1.58 | down | 0.00 |
| 599 | ENSMUST00000150402 | 15247  | Hiat1         | 2.25 | up | 0.00 | -1.88 | down | 0.00 |
| 600 | ENSMUST00000176687 |        |               | 2.25 | up | 0.02 | -1.29 | down | 0.02 |
| 601 | AK020279           | 77123  | 9130214F15Rik | 2.25 | up | 0.01 | -1.79 | down | 0.00 |
| 602 | BC058197           | 76051  | Ganc          | 2.25 | up | 0.01 | -1.56 | down | 0.00 |
| 603 | NM_001167746       | 69926  | Dnah17        | 2.25 | up | 0.00 | -1.87 | down | 0.00 |
| 604 | NM_008205          | 14997  | H2-M9         | 2.26 | up | 0.01 | -1.72 | down | 0.00 |
| 605 | NM_146666          | 258660 | Olfr736       | 2.26 | up | 0.00 | -1.49 | down | 0.05 |
| 606 | CD548909           |        |               | 2.26 | up | 0.00 | -1.81 | down | 0.00 |
| 607 | BX519376           | 98401  | AI594674      | 2.26 | up | 0.01 | -1.59 | down | 0.02 |
| 608 | NM_007550          | 12144  | Blm           | 2.26 | up | 0.00 | -1.84 | down | 0.00 |
| 609 | AK042948           | 1E+08  | LOC101056015  | 2.27 | up | 0.00 | -1.85 | down | 0.00 |
| 610 | AK028492           |        |               | 2.27 | up | 0.00 | -1.47 | down | 0.01 |
| 611 | AK015936           | 75231  | 4930529I22Rik | 2.27 | up | 0.00 | -1.65 | down | 0.00 |
| 612 | XM_006515852       | 238331 | Zdhhc22       | 2.27 | up | 0.00 | -1.75 | down | 0.00 |
| 613 | NM_022886          | 64929  | Scel          | 2.27 | up | 0.00 | -1.79 | down | 0.00 |
| 614 | NM_026421          | 67870  | Enoph1        | 2.28 | up | 0.00 | -1.73 | down | 0.01 |

|     |                    |        |               |      |    |      |       |      |      |
|-----|--------------------|--------|---------------|------|----|------|-------|------|------|
| 615 | AK040329           | 84544  | Cd96          | 2.28 | up | 0.00 | -1.88 | down | 0.01 |
| 616 | NM_029064          | 74711  | Ttl9          | 2.29 | up | 0.00 | -1.97 | down | 0.02 |
| 617 | NM_028749          | 74091  | Npl           | 2.29 | up | 0.01 | -1.70 | down | 0.04 |
| 618 | NM_153106          | 242726 | Padi6         | 2.29 | up | 0.01 | -1.60 | down | 0.00 |
| 619 | ENSMUST00000173109 | 53357  | Pla2g6        | 2.30 | up | 0.00 | -1.28 | down | 0.02 |
| 620 | NM_023370          | 22295  | Cdh23         | 2.31 | up | 0.00 | -1.88 | down | 0.00 |
| 621 | NM_146739          | 258734 | Olfir502      | 2.32 | up | 0.00 | -1.49 | down | 0.02 |
| 622 | NM_029310          | 75497  | Fabp12        | 2.32 | up | 0.00 | -1.90 | down | 0.00 |
| 623 | NM_146967          | 258969 | Olfir1226     | 2.33 | up | 0.00 | -1.59 | down | 0.01 |
| 624 | AK164443           | 21975  | Top3a         | 2.33 | up | 0.00 | -1.80 | down | 0.00 |
| 625 | BC022662           |        |               | 2.33 | up | 0.02 | -1.66 | down | 0.00 |
| 626 | NM_009491          | 22307  | Vmn2r10       | 2.33 | up | 0.00 | -1.87 | down | 0.01 |
| 627 | AK080358           | 668311 | Gm9099        | 2.34 | up | 0.00 | -1.73 | down | 0.01 |
| 628 | XM_011246586       | 68327  | Tsr3          | 2.34 | up | 0.00 | -1.98 | down | 0.00 |
| 629 | NM_001011518       | 258219 | Olfir94       | 2.34 | up | 0.00 | -1.83 | down | 0.00 |
| 630 | NM_138673          | 192188 | Stab2         | 2.34 | up | 0.00 | -1.38 | down | 0.01 |
| 631 | XM_006531872       | 225852 | Gm550         | 2.34 | up | 0.00 | -1.54 | down | 0.01 |
| 632 | NM_177791          | 279499 | Kctd19        | 2.35 | up | 0.01 | -1.62 | down | 0.02 |
| 633 | DV065341           | 72767  | 2810427A07Rik | 2.35 | up | 0.00 | -1.69 | down | 0.00 |
| 634 | NM_178412          | 229688 | Chil6         | 2.35 | up | 0.02 | -1.67 | down | 0.00 |
| 635 | ENSMUST00000195258 | 19206  | Ptch1         | 2.36 | up | 0.00 | -1.70 | down | 0.01 |
| 636 | AK090034           | 1E+08  | Gm3161        | 2.36 | up | 0.00 | -1.85 | down | 0.00 |
| 637 | AK136711           | 244757 | Glb112        | 2.36 | up | 0.00 | -1.56 | down | 0.00 |
| 638 | NM_030100          | 78428  | Wibg          | 2.37 | up | 0.00 | -1.95 | down | 0.00 |
| 639 | NM_007709          | 12705  | Cited1        | 2.37 | up | 0.00 | -1.73 | down | 0.00 |
| 640 | NM_134220          | 171254 | Vmn1r198      | 2.38 | up | 0.00 | -1.73 | down | 0.00 |
| 641 | NM_133720          | 70086  | Cysltr2       | 2.38 | up | 0.00 | -1.97 | down | 0.00 |
| 642 | XM_006504899       | 1E+08  | Gm15411       | 2.39 | up | 0.00 | -1.76 | down | 0.00 |
| 643 | NM_027790          | 71412  | Dhrs2         | 2.39 | up | 0.00 | -1.85 | down | 0.00 |
| 644 | NM_134212          | 171246 | Vmn1r200      | 2.39 | up | 0.01 | -1.60 | down | 0.01 |
| 645 | ENSMUST00000130873 | 12111  | Bgn           | 2.40 | up | 0.04 | -1.83 | down | 0.01 |

|     |                    |        |               |      |    |      |       |      |      |
|-----|--------------------|--------|---------------|------|----|------|-------|------|------|
| 646 | NM_172900          | 243958 | Siglecg       | 2.40 | up | 0.02 | -1.61 | down | 0.02 |
| 647 | XM_006520654       | 20273  | Scn8a         | 2.40 | up | 0.00 | -1.99 | down | 0.00 |
| 648 | NM_146353          | 258350 | Olfir706      | 2.40 | up | 0.00 | -1.56 | down | 0.02 |
| 649 | ENSMUST00000140066 | 54139  | Irf6          | 2.40 | up | 0.00 | -2.00 | down | 0.00 |
| 650 | ENSMUST00000110031 | 11992  | Auh           | 2.41 | up | 0.00 | -1.92 | down | 0.00 |
| 651 | ENSMUST00000146477 | 99237  | Tm9sf4        | 2.42 | up | 0.00 | -1.91 | down | 0.00 |
| 652 | CK334688           | 105271 | AU017674      | 2.43 | up | 0.00 | -1.55 | down | 0.01 |
| 653 | ENSMUST00000190711 | 14859  | Gsta3         | 2.43 | up | 0.01 | -1.63 | down | 0.00 |
| 654 | XM_011242052       | 24099  | Tnfsf13b      | 2.44 | up | 0.00 | -1.50 | down | 0.01 |
| 655 | AK031735           |        |               | 2.44 | up | 0.00 | -1.92 | down | 0.00 |
| 656 | NM_021340          | 57811  | Rgr           | 2.44 | up | 0.03 | -1.68 | down | 0.01 |
| 657 | ENSMUST00000146433 |        |               | 2.44 | up | 0.01 | -1.56 | down | 0.00 |
| 658 | XM_006516464       | 116852 | Akr1c20       | 2.44 | up | 0.02 | -1.53 | down | 0.00 |
| 659 | NM_011741          | 22635  | Zan           | 2.45 | up | 0.00 | -1.84 | down | 0.00 |
| 660 | NM_198628          | 279029 | Stkld1        | 2.45 | up | 0.01 | -1.54 | down | 0.01 |
| 661 | NM_001301682       | 330470 | Bsph1         | 2.46 | up | 0.00 | -1.88 | down | 0.00 |
| 662 | AK046275           | 75868  | 4930588A03Rik | 2.47 | up | 0.00 | -1.51 | down | 0.00 |
| 663 | NM_029440          | 381693 | Wdr95         | 2.48 | up | 0.00 | -1.79 | down | 0.00 |
| 664 | ENSMUST00000119421 |        |               | 2.48 | up | 0.00 | -1.87 | down | 0.00 |
| 665 | ENSMUST00000117983 |        |               | 2.49 | up | 0.00 | -1.82 | down | 0.00 |
| 666 | ENSMUST00000120183 |        |               | 2.49 | up | 0.03 | -1.98 | down | 0.01 |
| 667 | NM_027104          | 71886  | 2310002L09Rik | 2.49 | up | 0.00 | -1.33 | down | 0.05 |
| 668 | ENSMUST00000121277 |        |               | 2.50 | up | 0.00 | -1.82 | down | 0.00 |
| 669 | AK135767           | 629734 | Gm6999        | 2.50 | up | 0.00 | -1.56 | down | 0.01 |
| 670 | NM_016718          | 29862  | Ninj2         | 2.51 | up | 0.00 | -1.80 | down | 0.01 |
| 671 | NM_007720          | 12776  | Ccr8          | 2.51 | up | 0.00 | -1.73 | down | 0.00 |
| 672 | NM_029031          | 74637  | Shpk          | 2.52 | up | 0.00 | -1.90 | down | 0.00 |
| 673 | NM_009362          | 21784  | Tff1          | 2.52 | up | 0.00 | -1.77 | down | 0.00 |
| 674 | NM_007860          | 13370  | Dio1          | 2.53 | up | 0.00 | -1.65 | down | 0.00 |
| 675 | AK160242           | 665225 | Gm7544        | 2.54 | up | 0.00 | -1.77 | down | 0.01 |
| 676 | NM_001291001       | 70426  | Tekt5         | 2.55 | up | 0.00 | -1.96 | down | 0.00 |

|     |                    |        |               |      |    |      |       |      |      |
|-----|--------------------|--------|---------------|------|----|------|-------|------|------|
| 677 | AK037200           | 1E+08  | Gm26795       | 2.56 | up | 0.00 | -1.45 | down | 0.00 |
| 678 | NM_153598          | 100727 | Ugt2b34       | 2.56 | up | 0.00 | -2.00 | down | 0.01 |
| 679 | AK033044           | 360222 | Raxos1        | 2.57 | up | 0.00 | -1.74 | down | 0.01 |
| 680 | NM_183288          | 544817 | Arhgap27      | 2.58 | up | 0.00 | -1.86 | down | 0.02 |
| 681 | NM_011978          | 26458  | Slc27a2       | 2.58 | up | 0.02 | -1.36 | down | 0.00 |
| 682 | AK082204           |        |               | 2.58 | up | 0.02 | -1.35 | down | 0.03 |
| 683 | NM_007407          | 11517  | Adcyap1r1     | 2.58 | up | 0.00 | -1.63 | down | 0.00 |
| 684 | NM_001164682       | 227157 | Mpp4          | 2.59 | up | 0.00 | -1.61 | down | 0.00 |
| 685 | ENSMUST00000121186 |        |               | 2.59 | up | 0.01 | -1.44 | down | 0.00 |
| 686 | XM_006524267       | 240119 | St6gal2       | 2.60 | up | 0.00 | -1.59 | down | 0.00 |
| 687 | NM_001127686       | 436003 | Hbb-bh2       | 2.60 | up | 0.00 | -1.52 | down | 0.00 |
| 688 | NM_027600          | 70909  | 4921504E06Rik | 2.60 | up | 0.00 | -1.87 | down | 0.01 |
| 689 | NM_025621          | 66533  | 2310050C09Rik | 2.61 | up | 0.00 | -1.76 | down | 0.03 |
| 690 | AK155734           | 1E+08  | AK155734      | 2.64 | up | 0.00 | -1.50 | down | 0.00 |
| 691 | ENSMUST00000124702 | 229277 | Stoml3        | 2.67 | up | 0.00 | -1.76 | down | 0.00 |
| 692 | ENSMUST00000142944 | 21833  | Thra          | 2.69 | up | 0.00 | -1.35 | down | 0.01 |
| 693 | NM_145592          | 234130 | Dkk4          | 2.70 | up | 0.00 | -1.90 | down | 0.00 |
| 694 | NM_027105          | 69533  | Krtap26-1     | 2.71 | up | 0.00 | -1.84 | down | 0.00 |
| 695 | NM_001080809       | 227231 | Cps1          | 2.72 | up | 0.00 | -1.82 | down | 0.01 |
| 696 | NM_026516          | 68027  | Tmem178       | 2.72 | up | 0.00 | -1.98 | down | 0.00 |
| 697 | NM_029464          | 75860  | Tex26         | 2.73 | up | 0.01 | -1.57 | down | 0.00 |
| 698 | TC1666663          |        |               | 2.73 | up | 0.00 | -1.73 | down | 0.00 |
| 699 | NM_174865          | 317652 | Klk15         | 2.73 | up | 0.00 | -1.69 | down | 0.00 |
| 700 | ENSMUST00000043170 |        |               | 2.74 | up | 0.00 | -1.98 | down | 0.00 |
| 701 | NM_019471          | 17384  | Mmp10         | 2.75 | up | 0.00 | -1.67 | down | 0.02 |
| 702 | ENSMUST00000147330 | 12704  | Cit           | 2.76 | up | 0.00 | -1.54 | down | 0.01 |
| 703 | AK141100           | 320684 | 9630028H03Rik | 2.77 | up | 0.00 | -1.70 | down | 0.01 |
| 704 | NM_177591          | 209268 | Igsf1         | 2.78 | up | 0.00 | -1.56 | down | 0.00 |
| 705 | ENSMUST00000143959 | 71382  | Pex1          | 2.78 | up | 0.00 | -1.82 | down | 0.00 |
| 706 | ENSMUST00000155469 | 13839  | Epha5         | 2.81 | up | 0.00 | -1.54 | down | 0.03 |
| 707 | XM_006544087       |        | LOC102641508  | 2.81 | up | 0.00 | -1.99 | down | 0.00 |



|     |                    |        |               |      |    |      |       |      |      |
|-----|--------------------|--------|---------------|------|----|------|-------|------|------|
| 708 | NM_010127          | 19009  | Pou6f1        | 2.82 | up | 0.01 | -1.79 | down | 0.01 |
| 709 | NM_177900          | 330790 | Hapln4        | 2.87 | up | 0.00 | -1.33 | down | 0.04 |
| 710 | AK218396           |        |               | 2.87 | up | 0.00 | -1.93 | down | 0.00 |
| 711 | NM_178673          | 213262 | Fstl5         | 2.90 | up | 0.00 | -1.48 | down | 0.01 |
| 712 | NM_182957          | 66773  | Gm17019       | 2.92 | up | 0.00 | -1.76 | down | 0.00 |
| 713 | ENSMUST00000069035 |        |               | 2.95 | up | 0.00 | -1.72 | down | 0.01 |
| 714 | XM_006524202       | 225049 | Ttc7          | 2.97 | up | 0.00 | -1.75 | down | 0.00 |
| 715 | NM_146951          | 258953 | Olfir340      | 2.98 | up | 0.01 | -1.44 | down | 0.01 |
| 716 | NM_001033238       | 208650 | Cblb          | 2.99 | up | 0.00 | -1.85 | down | 0.00 |
| 717 | NM_001013753       | 219228 | Pcdh17        | 3.00 | up | 0.00 | -1.72 | down | 0.00 |
| 718 | NM_028033          | 71979  | 2410012M07Rik | 3.00 | up | 0.00 | -1.92 | down | 0.00 |
| 719 | NM_001011803       | 258023 | Olfir1306     | 3.01 | up | 0.00 | -1.71 | down | 0.00 |
| 720 | NM_178247          | 347708 | Dppa1         | 3.03 | up | 0.01 | -1.59 | down | 0.00 |
| 721 | AK029692           | 74923  | 4930471D02Rik | 3.05 | up | 0.00 | -1.68 | down | 0.01 |
| 722 | NM_023816          | 76389  | Ankrd36       | 3.08 | up | 0.00 | -1.85 | down | 0.00 |
| 723 | XM_006528656       |        | LOC101055948  | 3.12 | up | 0.00 | -1.46 | down | 0.01 |
| 724 | XM_006517153       | 18548  | Pcsk1         | 3.14 | up | 0.00 | -1.94 | down | 0.00 |
| 725 | NM_008811          | 18598  | Pdha2         | 3.15 | up | 0.00 | -1.70 | down | 0.00 |
| 726 | AK020961           | 77981  | B230110C06Rik | 3.18 | up | 0.00 | -1.99 | down | 0.05 |
| 727 | NM_010420          | 15209  | Hesx1         | 3.24 | up | 0.00 | -1.99 | down | 0.01 |
| 728 | NM_183031          | 321019 | Gpr183        | 3.25 | up | 0.00 | -1.75 | down | 0.00 |
| 729 | NM_009903          | 12740  | Cldn4         | 3.26 | up | 0.01 | -1.93 | down | 0.01 |
| 730 | AK086943           | 629554 | Gm6980        | 3.28 | up | 0.00 | -1.62 | down | 0.00 |
| 731 | NM_011440          | 20669  | Sox14         | 3.28 | up | 0.00 | -1.81 | down | 0.00 |
| 732 | ENSMUST00000107861 | 72605  | Car10         | 3.35 | up | 0.00 | -1.82 | down | 0.00 |
| 733 | AK088235           | 70966  | 4931415C17Rik | 3.35 | up | 0.00 | -1.95 | down | 0.01 |
| 734 | NM_178245          | 244813 | Bsx           | 3.39 | up | 0.00 | -1.86 | down | 0.01 |
| 735 | BI499719           |        |               | 3.45 | up | 0.00 | -1.64 | down | 0.01 |
| 736 | NM_001159389       | 320995 | Rfx6          | 3.55 | up | 0.00 | -1.75 | down | 0.00 |
| 737 | ENSMUST00000154712 | 75062  | Sf3a3         | 3.55 | up | 0.00 | -1.80 | down | 0.00 |
| 738 | NM_023894          | 104384 | Rhox9         | 3.69 | up | 0.00 | -1.97 | down | 0.00 |

|     |                    |        |               |       |    |      |       |      |      |
|-----|--------------------|--------|---------------|-------|----|------|-------|------|------|
| 739 | ENSMUST00000116442 | 15444  | Hpca          | 3.71  | up | 0.00 | -1.87 | down | 0.03 |
| 740 | NM_173409          | 233918 | 4933402N03Rik | 3.74  | up | 0.00 | -1.74 | down | 0.01 |
| 741 | NM_194333          | 22626  | Slc23a3       | 3.80  | up | 0.00 | -1.87 | down | 0.01 |
| 742 | NM_176951          | 319581 | Xkr5          | 4.30  | up | 0.00 | -1.68 | down | 0.02 |
| 743 | NM_001112744       | 230972 | Arhgef16      | 10.18 | up | 0.00 | -1.66 | down | 0.01 |

No. number; IH, chronic intermittent hypoxia; N, Normoxia; RNpIH, Re-Normoxia-post-chronic intermittent hypoxia; Reg.regulation

**Table S2. KEGG pathway analysis of the differentially expressed proteins in aortas from CIH-treated mice.**

| Term_ID       | Term_description                             | Gene Ratio | Bg Ratio | P value | FDR bh | Fold  | GeneSymbols                                                                       |
|---------------|----------------------------------------------|------------|----------|---------|--------|-------|-----------------------------------------------------------------------------------|
| path:mmu03013 | RNA transport                                | 0.058      | 0.021    | 0.001   | 0.133  | 2.815 | Eif1;Gm5415;Gm9839;Ncbp2;Nup37;Thoc2;Rbm8a;Nup153;Eif1ax;Eif3j2;Pym1;Magohb;Kpnb1 |
| path:mmu03040 | Spliceosome                                  | 0.049      | 0.016    | 0.001   | 0.133  | 2.991 | Ncbp2;Sf3a3;Thoc2;Ppih;Magohb;Rbm22;Hspa8;Sf3b6;Crnk11;Rbm8a;Lsm5                 |
| path:mmu00053 | Ascorbate and aldarate metabolism            | 0.018      | 0.003    | 0.006   | 0.369  | 5.357 | Ugdh;Ugt2b34;Ugt2a3;Ugt2b38                                                       |
| path:mmu04146 | Peroxisome                                   | 0.031      | 0.010    | 0.008   | 0.369  | 3.013 | Ddo;Slc27a2;Idh1;Gstk1;Mpv17l;Pex1;Acsl3                                          |
| path:mmu00980 | Metabolism of xenobiotics by cytochrome P450 | 0.027      | 0.008    | 0.009   | 0.369  | 3.338 | Gsta3;Ugt2b34;Gstk1;Ugt2b38;Ugt2a3;Cyp2f2                                         |
| path:mmu00982 | Drug metabolism                              | 0.027      | 0.008    | 0.010   | 0.369  | 3.238 | Gsta3;Ugt2b34;Gstk1;Ugt2b38;Ugt2a3;Fmo5                                           |
| path:mmu00520 | Amino sugar and nucleotide sugar metabolism  | 0.022      | 0.006    | 0.011   | 0.369  | 3.690 | Gnpda2;Npl;Ugdh;Fpgt;Cmas                                                         |
| path:mmu04612 | Antigen processing and presentation          | 0.031      | 0.011    | 0.013   | 0.369  | 2.782 | Creb1;Nfyb;H2-M9;Hsp90aa1;Rfxap;Hspa8;Canx                                        |
| path:mmu00040 | Pentose and glucuronate interconversions     | 0.018      | 0.004    | 0.014   | 0.369  | 4.254 | Ugdh;Ugt2b34;Ugt2a3;Ugt2b38                                                       |
| path:mmu00860 | Porphyryn and chlorophyll metabolism         | 0.018      | 0.005    | 0.026   | 0.625  | 3.528 | Cox10;Ugt2b34;Ugt2a3;Ugt2b38                                                      |
| path:mmu00592 | alpha-Linolenic acid metabolism              | 0.013      | 0.003    | 0.031   | 0.672  | 4.339 | Pla2g5;Pla2g6;Plb1                                                                |
| path:mmu00565 | Ether lipid metabolism                       | 0.018      | 0.006    | 0.035   | 0.704  | 3.214 | Pla2g5;Enpp6;Pla2g6;Plb1                                                          |
| path:mmu04211 | Longevity regulating pathway                 | 0.027      | 0.011    | 0.038   | 0.706  | 2.411 | Creb1;Atf4;Rheb;Rb1cc1;Creb5;Sesn3                                                |
| path:mmu04330 | Notch signaling pathway                      | 0.018      | 0.006    | 0.046   | 0.786  | 2.952 | Aph1b;Aph1c;Rbpjl;Notch4                                                          |
| path:mmu04310 | Wnt signaling pathway                        | 0.036      | 0.018    | 0.049   | 0.786  | 1.981 | Gm5415;Gm9839;Fosl1;Cacybp;Ccmd2;Dkk4;Sfrp1;Myc                                   |
| path:mmu00983 | Drug metabolism                              | 0.018      | 0.006    | 0.055   | 0.786  | 2.782 | Umps;Ugt2b34;Ugt2a3;Ugt2b38                                                       |

|               |                                            |       |       |       |       |       |                                                                  |
|---------------|--------------------------------------------|-------|-------|-------|-------|-------|------------------------------------------------------------------|
| path:mmu05203 | Viral carcinogenesis                       | 0.049 | 0.028 | 0.055 | 0.786 | 1.722 | Creb1;Gtf2a1;H2-M9;Rbpjl;Ube3a;Atf4;Creb5;Cnd2;Gtf2h1;Sp100;Ccr8 |
| path:mmu05143 | African trypanosomiasis                    | 0.013 | 0.004 | 0.076 | 0.925 | 3.013 | Il12a;FasI;Vcam1                                                 |
| path:mmu03018 | RNA degradation                            | 0.022 | 0.010 | 0.079 | 0.925 | 2.178 | Btg3;Exosc3;Dcps;Lsm5;Hspd1                                      |
| path:mmu00620 | Pyruvate metabolism                        | 0.013 | 0.005 | 0.087 | 0.925 | 2.855 | Acyp1;Pklr;Pdha2                                                 |
| path:mmu00480 | Glutathione metabolism                     | 0.018 | 0.007 | 0.088 | 0.925 | 2.371 | Ggct;Gsta3;Idh1;Gstk1                                            |
| path:mmu04120 | Ubiquitin mediated proteolysis             | 0.031 | 0.017 | 0.093 | 0.925 | 1.808 | Anapc10;Ube3a;Ube2w;Ube2c;Cblb;Uba3;Cul5                         |
| path:mmu04919 | Thyroid hormone signaling pathway          | 0.027 | 0.014 | 0.099 | 0.925 | 1.887 | Thra;Rheb;Slc16a10;Dio1;Notch4;Myc                               |
| path:mmu00590 | Arachidonic acid metabolism                | 0.022 | 0.011 | 0.100 | 0.925 | 2.031 | Pla2g6;Alox12b;Pla2g5;Tbxas1;Plb1                                |
| path:mmu05204 | Chemical carcinogenesis                    | 0.022 | 0.011 | 0.115 | 0.925 | 1.944 | Gsta3;Ugt2b34;Gstk1;Ugt2b38;Ugt2a3                               |
| path:mmu01200 | Carbon metabolism                          | 0.027 | 0.015 | 0.115 | 0.925 | 1.808 | Pklr;Idh1;Mcee;Cps1;Mut;Pdha2                                    |
| path:mmu04962 | Vasopressin-regulated water reabsorption   | 0.013 | 0.005 | 0.115 | 0.925 | 2.523 | Creb1;Dync2h1;Creb5                                              |
| path:mmu05152 | Tuberculosis                               | 0.036 | 0.022 | 0.120 | 0.925 | 1.625 | Creb1;Nfyb;Atp6v1h;Malt1;Rfxap;Hspd1;Il12a;Eea1                  |
| path:mmu04340 | Hedgehog signaling pathway                 | 0.013 | 0.005 | 0.121 | 0.925 | 2.465 | Ptch1;Dhh;Cnd2                                                   |
| path:mmu03022 | Basal transcription factors                | 0.013 | 0.005 | 0.121 | 0.925 | 2.465 | Gtf2a1;Gtf2h1;Taf9b                                              |
| path:mmu03015 | mRNA surveillance pathway                  | 0.022 | 0.012 | 0.126 | 0.925 | 1.883 | Ncbp2;Gspt1;Magohb;Pym1;Rbm8a                                    |
| path:mmu04915 | Estrogen signaling pathway                 | 0.022 | 0.012 | 0.126 | 0.925 | 1.883 | Creb1;Hsp90aa1;Atf4;Creb5;Hspa8                                  |
| path:mmu04940 | Type I diabetes mellitus                   | 0.018 | 0.009 | 0.128 | 0.925 | 2.066 | Il12a;H2-M9;FasI;Hspd1                                           |
| path:mmu05215 | Prostate cancer                            | 0.022 | 0.012 | 0.131 | 0.925 | 1.864 | Creb1;Hsp90aa1;Atf4;Creb5;Braf                                   |
| path:mmu04977 | Vitamin digestion and absorption           | 0.009 | 0.003 | 0.141 | 0.954 | 3.013 | Slc19a2;Plb1                                                     |
| path:mmu04918 | Thyroid hormone synthesis                  | 0.018 | 0.009 | 0.143 | 0.954 | 1.981 | Creb1;Creb5;Atf4;Canx                                            |
| path:mmu05030 | Cocaine addiction                          | 0.013 | 0.006 | 0.147 | 0.954 | 2.260 | Creb1;Creb5;Atf4                                                 |
| path:mmu00591 | Linoleic acid metabolism                   | 0.013 | 0.006 | 0.160 | 0.980 | 2.170 | Pla2g5;Pla2g6;Plb1                                               |
| path:mmu01230 | Biosynthesis of amino acids                | 0.018 | 0.009 | 0.164 | 0.980 | 1.878 | Cth;Cps1;Pklr;Idh1                                               |
| path:mmu03460 | Fanconi anemia pathway                     | 0.013 | 0.006 | 0.167 | 0.980 | 2.127 | Rev1;Top3a;Blm                                                   |
| path:mmu04950 | Maturity onset diabetes of the young       | 0.009 | 0.003 | 0.171 | 0.980 | 2.679 | Rfx6;Pklr                                                        |
| path:mmu00630 | Glyoxylate and dicarboxylate metabolism    | 0.009 | 0.004 | 0.191 | 0.980 | 2.494 | Mcee;Mut                                                         |
| path:mmu05418 | Fluid shear stress and atherosclerosis     | 0.027 | 0.017 | 0.200 | 0.980 | 1.528 | Hsp90aa1;Gsta3;Klf2;Dusp1;Vcam1;Nfe2l2                           |
| path:mmu03020 | RNA polymerase                             | 0.009 | 0.004 | 0.201 | 0.980 | 2.411 | Polr3k;Polr1d                                                    |
| path:mmu00280 | Valine, leucine and isoleucine degradation | 0.013 | 0.007 | 0.201 | 0.980 | 1.937 | Mcee;Auh;Mut                                                     |
| path:mmu03320 | PPAR signaling pathway                     | 0.018 | 0.010 | 0.208 | 0.980 | 1.702 | Apoc3;Slc27a2;Acsl3;Fabp6                                        |

|               |                                             |       |       |       |       |       |                                                          |
|---------------|---------------------------------------------|-------|-------|-------|-------|-------|----------------------------------------------------------|
| path:mmu04911 | Insulin secretion                           | 0.018 | 0.010 | 0.208 | 0.980 | 1.702 | Creb1;Creb5;Atf4;Adcyap1r1                               |
| path:mmu00640 | Propanoate metabolism                       | 0.009 | 0.004 | 0.211 | 0.980 | 2.333 | Mcee;Mut                                                 |
| path:mmu05134 | Legionellosis                               | 0.013 | 0.007 | 0.216 | 0.980 | 1.870 | Il12a;Hspd1;Hspa8                                        |
| path:mmu04658 | Th1 and Th2 cell differentiation            | 0.018 | 0.011 | 0.220 | 0.980 | 1.663 | Il12a;Rbpjl;Nfkbie;Il12rb1                               |
| path:mmu00020 | Citrate cycle (TCA cycle)                   | 0.009 | 0.004 | 0.221 | 0.980 | 2.260 | Idh1;Pdha2                                               |
| path:mmu00310 | Lysine degradation                          | 0.013 | 0.007 | 0.223 | 0.980 | 1.839 | Ezh1;Nsd1;Kmt5b                                          |
| path:mmu04974 | Protein digestion and absorption            | 0.018 | 0.011 | 0.238 | 0.980 | 1.607 | Slc7a9;Slc16a10;Col11a1;Cela2a                           |
| path:mmu04914 | Progesterone-mediated oocyte maturation     | 0.018 | 0.011 | 0.238 | 0.980 | 1.607 | Braf;Hsp90aa1;Anapc10;Pgr                                |
| path:mmu00830 | Retinol metabolism                          | 0.018 | 0.011 | 0.244 | 0.980 | 1.589 | Ugt2b34;Ugt2a3;Ugt2b38;Rdh10                             |
| path:mmu05166 | HTLV-I infection                            | 0.044 | 0.035 | 0.254 | 0.980 | 1.282 | Creb1;Anapc10;H2-M9;Fosl1;Nfyb;Atf4;Ccnd2;Vcam1;Myc;Canx |
| path:mmu05330 | Allograft rejection                         | 0.013 | 0.008 | 0.260 | 0.980 | 1.695 | Il12a;H2-M9;Fasl                                         |
| path:mmu00920 | Sulfur metabolism                           | 0.004 | 0.001 | 0.266 | 0.980 | 3.287 | Bpnt1                                                    |
| path:mmu00250 | Alanine, aspartate and glutamate metabolism | 0.009 | 0.005 | 0.273 | 0.980 | 1.955 | Ddo;Cps1                                                 |
| path:mmu05216 | Thyroid cancer                              | 0.009 | 0.005 | 0.273 | 0.980 | 1.955 | Braf;Myc                                                 |
| path:mmu00564 | Glycerophospholipid metabolism              | 0.018 | 0.012 | 0.281 | 0.980 | 1.491 | Dgki;Pla2g5;Pla2g6;Plb1                                  |
| path:mmu04115 | p53 signaling pathway                       | 0.013 | 0.008 | 0.283 | 0.980 | 1.619 | Ccng1;Sesn3;Ccnd2                                        |
| path:mmu05031 | Amphetamine addiction                       | 0.013 | 0.008 | 0.290 | 0.980 | 1.595 | Creb1;Creb5;Atf4                                         |
| path:mmu05221 | Acute myeloid leukemia                      | 0.013 | 0.008 | 0.298 | 0.980 | 1.572 | Braf;Myc;Mpo                                             |
| path:mmu04726 | Serotonergic synapse                        | 0.022 | 0.016 | 0.302 | 0.980 | 1.370 | Htr6;Alox12b;Dusp1;Trpc1;Braf                            |
| path:mmu00240 | Pyrimidine metabolism                       | 0.018 | 0.012 | 0.306 | 0.980 | 1.432 | Umps;Pola1;Polr3k;Polr1d                                 |
| path:mmu04630 | Jak-STAT signaling pathway                  | 0.027 | 0.020 | 0.306 | 0.980 | 1.315 | Lepr;Ccnd2;Csf2rb;Il12a;Myc;Il12rb1                      |
| path:mmu04141 | Protein processing in endoplasmic reticulum | 0.027 | 0.020 | 0.311 | 0.980 | 1.307 | Hsp90aa1;Atf4;Ubqln1;Hspa8;Nfe2l2;Canx                   |
| path:mmu04922 | Glucagon signaling pathway                  | 0.018 | 0.013 | 0.312 | 0.980 | 1.418 | Creb1;Creb5;Atf4;Pdha2                                   |
| path:mmu04920 | Adipocytokine signaling pathway             | 0.013 | 0.009 | 0.313 | 0.980 | 1.528 | Acsl3;Lepr;Nfkbie                                        |
| path:mmu05219 | Bladder cancer                              | 0.009 | 0.005 | 0.314 | 0.980 | 1.764 | Braf;Myc                                                 |
| path:mmu03440 | Homologous recombination                    | 0.009 | 0.005 | 0.314 | 0.980 | 1.764 | Top3a;Blm                                                |
| path:mmu05162 | Measles                                     | 0.022 | 0.017 | 0.323 | 0.980 | 1.329 | Ccnd2;Cblb;Hspa8;Il12a;Fasl                              |
| path:mmu00061 | Fatty acid biosynthesis                     | 0.004 | 0.002 | 0.325 | 0.980 | 2.583 | Acsl3                                                    |

|               |                                              |       |       |       |       |       |                                                                                                                                                                                                                                      |
|---------------|----------------------------------------------|-------|-------|-------|-------|-------|--------------------------------------------------------------------------------------------------------------------------------------------------------------------------------------------------------------------------------------|
| path:mmu04672 | Intestinal immune network for IgA production | 0.009 | 0.005 | 0.335 | 0.980 | 1.682 | Pigr;Tnfsf13b                                                                                                                                                                                                                        |
| path:mmu05210 | Colorectal cancer                            | 0.013 | 0.009 | 0.336 | 0.980 | 1.466 | Braf;Ralgds;Myc                                                                                                                                                                                                                      |
| path:mmu04668 | TNF signaling pathway                        | 0.018 | 0.013 | 0.350 | 0.980 | 1.339 | Creb1;Creb5;Atf4;Vcam1                                                                                                                                                                                                               |
| path:mmu05161 | Hepatitis B                                  | 0.022 | 0.018 | 0.362 | 0.980 | 1.264 | Creb1;Atf4;Creb5;Fasl;Myc                                                                                                                                                                                                            |
| path:mmu03010 | Ribosome                                     | 0.027 | 0.022 | 0.365 | 0.980 | 1.226 | Rpl39;Mrpl32;Rpl34-ps1;Rps12;Mrps6;Rpl36a                                                                                                                                                                                            |
| path:mmu05220 | Chronic myeloid leukemia                     | 0.013 | 0.010 | 0.367 | 0.980 | 1.391 | Braf;Cblb;Myc                                                                                                                                                                                                                        |
| path:mmu00450 | Selenocompound metabolism                    | 0.004 | 0.002 | 0.380 | 0.980 | 2.127 | Cth                                                                                                                                                                                                                                  |
| path:mmu00910 | Nitrogen metabolism                          | 0.004 | 0.002 | 0.380 | 0.980 | 2.127 | Cps1                                                                                                                                                                                                                                 |
| path:mmu04725 | Cholinergic synapse                          | 0.018 | 0.014 | 0.381 | 0.980 | 1.280 | Creb1;Chrn2;Creb5;Atf4                                                                                                                                                                                                               |
| path:mmu05144 | Malaria                                      | 0.009 | 0.006 | 0.395 | 0.980 | 1.476 | Il12a;Vcam1                                                                                                                                                                                                                          |
| path:mmu00270 | Cysteine and methionine metabolism           | 0.009 | 0.006 | 0.395 | 0.980 | 1.476 | Cth;Enoph1                                                                                                                                                                                                                           |
| path:mmu05202 | Transcriptional misregulation in cancer      | 0.027 | 0.022 | 0.395 | 0.980 | 1.186 | Myc;Ccnd2;Lmo2;Mpo;Mllt3;Bmi1                                                                                                                                                                                                        |
| path:mmu04145 | Phagosome                                    | 0.027 | 0.022 | 0.395 | 0.980 | 1.186 | H2-M9;Atp6v1h;Mpo;Dync2h1;Eea1;Canx                                                                                                                                                                                                  |
| path:mmu03008 | Ribosome biogenesis in eukaryotes            | 0.018 | 0.014 | 0.400 | 0.980 | 1.247 | Lsg1;Heatr1;Gar1;Riok1                                                                                                                                                                                                               |
| path:mmu05169 | Epstein-Barr virus infection                 | 0.031 | 0.027 | 0.407 | 0.980 | 1.151 | H2-M9;Rbpjl;Polr3k;Nfkbie;Polr1d;Hspa8;Myc                                                                                                                                                                                           |
| path:mmu00220 | Arginine biosynthesis                        | 0.004 | 0.002 | 0.413 | 0.980 | 1.903 | Cps1                                                                                                                                                                                                                                 |
| path:mmu01210 | 2-Oxocarboxylic acid metabolism              | 0.004 | 0.002 | 0.413 | 0.980 | 1.903 | Idh1                                                                                                                                                                                                                                 |
| path:mmu00100 | Steroid biosynthesis                         | 0.004 | 0.002 | 0.413 | 0.980 | 1.903 | Msmo1                                                                                                                                                                                                                                |
| path:mmu04012 | ErbB signaling pathway                       | 0.013 | 0.010 | 0.419 | 0.980 | 1.276 | Braf;Cblb;Myc                                                                                                                                                                                                                        |
| path:mmu01100 | Metabolic pathways                           | 0.169 | 0.162 | 0.420 | 0.980 | 1.041 | St6gal2;Polr3k;Pklr;Idh1;Gnpda2;Alox12b;Ugt2b38;Fpgt;Bpnt1;Ganc;Amdhd1;Mcee;Aprt;Msmo1;B3galt1;Rdh10;Tbxas1;Enoph1;Pla2g6;Pola1;Atp6v1h;Pla2g5;Cps1;Ugt2a3;Ugdh;Ckb;Cox10;Mut;Cmas;Ugt2b34;Cth;Umps;Acsl3;Auh;Dgki;Polr1d;Plb1;Pdha2 |
| path:mmu04722 | Neurotrophin signaling pathway               | 0.018 | 0.015 | 0.431 | 0.980 | 1.195 | Braf;Fasl;Nfkbie;Atf4                                                                                                                                                                                                                |
| path:mmu00140 | Steroid hormone biosynthesis                 | 0.013 | 0.011 | 0.434 | 0.980 | 1.247 | Ugt2b34;Ugt2a3;Ugt2b38                                                                                                                                                                                                               |
| path:mmu04142 | Lysosome                                     | 0.018 | 0.015 | 0.450 | 0.980 | 1.166 | Lamp3;Gm2a;Ap3m2;Atp6v1h                                                                                                                                                                                                             |
| path:mmu00514 | Other types of O-glycan biosynthesis         | 0.004 | 0.003 | 0.461 | 0.980 | 1.644 | St6gal2                                                                                                                                                                                                                              |
| path:mmu04152 | AMPK signaling pathway                       | 0.018 | 0.015 | 0.462 | 0.980 | 1.148 | Creb1;Lepr;Creb5;Rheb                                                                                                                                                                                                                |
| path:mmu04024 | cAMP signaling pathway                       | 0.027 | 0.024 | 0.464 | 0.980 | 1.101 | Creb1;Htr6;Ptch1;Creb5;Braf;Adcyap1r1                                                                                                                                                                                                |

|               |                                        |       |       |       |       |       |                                                                                            |
|---------------|----------------------------------------|-------|-------|-------|-------|-------|--------------------------------------------------------------------------------------------|
| path:mmu04144 | Endocytosis                            | 0.036 | 0.033 | 0.473 | 0.980 | 1.071 | H2-M9;Cblb;Capza2;Snx1;Rbsn;Hspa8;Vps37a;Eea1                                              |
| path:mmu00360 | Phenylalanine metabolism               | 0.004 | 0.003 | 0.476 | 0.980 | 1.572 | Mif                                                                                        |
| path:mmu04060 | Cytokine-cytokine receptor interaction | 0.036 | 0.033 | 0.477 | 0.980 | 1.067 | Lepr;Cx3cr1;Il12rb1;Csf2rb;Il12a;Fasl;Tnfsf13b;Ccr8                                        |
| path:mmu05213 | Endometrial cancer                     | 0.009 | 0.007 | 0.480 | 0.980 | 1.247 | Braf;Myc                                                                                   |
| path:mmu04270 | Vascular smooth muscle contraction     | 0.018 | 0.016 | 0.480 | 0.980 | 1.121 | Braf;Pla2g6;Prkg1;Pla2g5                                                                   |
| path:mmu05321 | Inflammatory bowel disease (IBD)       | 0.009 | 0.007 | 0.489 | 0.980 | 1.226 | Il12a;Il12rb1                                                                              |
| path:mmu00340 | Histidine metabolism                   | 0.004 | 0.003 | 0.490 | 0.980 | 1.507 | Amdhd1                                                                                     |
| path:mmu04068 | FoxO signaling pathway                 | 0.018 | 0.016 | 0.498 | 0.980 | 1.096 | Braf;Fasl;Klf2;Ccnd2                                                                       |
| path:mmu04730 | Long-term depression                   | 0.009 | 0.007 | 0.506 | 0.980 | 1.186 | Braf;Prkg1                                                                                 |
| path:mmu04713 | Circadian entrainment                  | 0.013 | 0.012 | 0.512 | 0.980 | 1.107 | Creb1;Prkg1;Adcyap1r1                                                                      |
| path:mmu04721 | Synaptic vesicle cycle                 | 0.009 | 0.008 | 0.515 | 0.980 | 1.166 | Cplx2;Atp6v1h                                                                              |
| path:mmu05231 | Choline metabolism in cancer           | 0.013 | 0.012 | 0.519 | 0.980 | 1.096 | Dgki;Ralgs;Rheb                                                                            |
| path:mmu05200 | Pathways in cancer                     | 0.067 | 0.066 | 0.520 | 0.980 | 1.012 | Gsta3;Hsp90aa1;Ptch1;Nfe2l2;Ralgs;Ccnd2;Alk;Cblb;Notch4;Csf2rb;Braf;Il12a;Fasl;Myc;Il12rb1 |
| path:mmu04210 | Apoptosis                              | 0.018 | 0.017 | 0.522 | 0.980 | 1.064 | Csf2rb;Sept4;Fasl;Atf4                                                                     |
| path:mmu04925 | Aldosterone synthesis and secretion    | 0.013 | 0.012 | 0.526 | 0.980 | 1.085 | Creb1;Creb5;Atf4                                                                           |
| path:mmu00601 | Glycosphingolipid biosynthesis         | 0.004 | 0.003 | 0.532 | 0.980 | 1.339 | B3galt1                                                                                    |
| path:mmu05230 | Central carbon metabolism in cancer    | 0.009 | 0.008 | 0.532 | 0.980 | 1.130 | Myc;Pdha2                                                                                  |
| path:mmu04623 | Cytosolic DNA-sensing pathway          | 0.009 | 0.008 | 0.532 | 0.980 | 1.130 | Polr3k;Polr1d                                                                              |
| path:mmu04360 | Axon guidance                          | 0.022 | 0.022 | 0.535 | 0.980 | 1.033 | Sema3a;Ptch1;Sema4g;Epha5;Trpc1                                                            |
| path:mmu04659 | Th17 cell differentiation              | 0.013 | 0.013 | 0.539 | 0.980 | 1.064 | Hsp90aa1;Nfkbie;Il12rb1                                                                    |
| path:mmu05332 | Graft-versus-host disease              | 0.009 | 0.008 | 0.541 | 0.980 | 1.113 | H2-M9;Fasl                                                                                 |
| path:mmu04660 | T cell receptor signaling pathway      | 0.013 | 0.013 | 0.546 | 0.980 | 1.053 | Malt1;Cblb;Nfkbie                                                                          |
| path:mmu04972 | Pancreatic secretion                   | 0.013 | 0.013 | 0.546 | 0.980 | 1.053 | Trpc1;Pla2g5;Cela2a                                                                        |
| path:mmu05223 | Non-small cell lung cancer             | 0.009 | 0.008 | 0.549 | 0.980 | 1.096 | Braf;Alk                                                                                   |
| path:mmu00230 | Purine metabolism                      | 0.022 | 0.022 | 0.550 | 0.980 | 1.016 | Pola1;Polr3k;Pklr;Aprt;Polr1d                                                              |
| path:mmu04910 | Insulin signaling pathway              | 0.018 | 0.017 | 0.551 | 0.980 | 1.026 | Braf;Cblb;Pklr;Rheb                                                                        |
| path:mmu04064 | NF-kappa B signaling pathway           | 0.013 | 0.013 | 0.553 | 0.980 | 1.043 | Malt1;Tnfsf13b;Vcam1                                                                       |
| path:mmu00010 | Glycolysis / Gluconeogenesis           | 0.009 | 0.008 | 0.557 | 0.980 | 1.079 | Pklr;Pdha2                                                                                 |
| path:mmu04720 | Long-term potentiation                 | 0.009 | 0.008 | 0.557 | 0.980 | 1.079 | Braf;Atf4                                                                                  |
| path:mmu05146 | Amoebiasis                             | 0.013 | 0.013 | 0.566 | 0.980 | 1.023 | Il12a;Serpib6c;Serpib9                                                                     |

|               |                                                        |       |       |       |       |       |                                                      |
|---------------|--------------------------------------------------------|-------|-------|-------|-------|-------|------------------------------------------------------|
| path:mmu04010 | MAPK signaling pathway                                 | 0.036 | 0.036 | 0.566 | 0.980 | 0.987 | Atf4;Dusp5;Dusp1;Hspa8;Braf;Ppm1a;Fasl;Myc           |
| path:mmu04710 | Circadian rhythm                                       | 0.004 | 0.004 | 0.581 | 0.980 | 1.166 | Creb1                                                |
| path:mmu04931 | Insulin resistance                                     | 0.013 | 0.013 | 0.585 | 0.980 | 0.995 | Creb1;Slc27a2;Creb5                                  |
| path:mmu04215 | Apoptosis                                              | 0.004 | 0.004 | 0.593 | 0.980 | 1.130 | 43712                                                |
| path:mmu00052 | Galactose metabolism                                   | 0.004 | 0.004 | 0.593 | 0.980 | 1.130 | Ganc                                                 |
| path:mmu05412 | Arrhythmogenic right ventricular cardiomyopathy (ARVC) | 0.009 | 0.009 | 0.597 | 0.980 | 1.004 | Actn2;Gja1                                           |
| path:mmu04662 | B cell receptor signaling pathway                      | 0.009 | 0.009 | 0.597 | 0.980 | 1.004 | Malt1;Nfkbie                                         |
| path:mmu04924 | Renin secretion                                        | 0.009 | 0.009 | 0.597 | 0.980 | 1.004 | Creb1;Adcyap1r1                                      |
| path:mmu00500 | Starch and sucrose metabolism                          | 0.004 | 0.004 | 0.604 | 0.980 | 1.096 | Ganc                                                 |
| path:mmu05224 | Breast cancer                                          | 0.018 | 0.019 | 0.605 | 0.980 | 0.958 | Braf;Notch4;Pgr;Myc                                  |
| path:mmu04932 | Non-alcoholic fatty liver disease (NAFLD)              | 0.018 | 0.019 | 0.605 | 0.980 | 0.958 | Fasl;Lepr;Pklr;Atf4                                  |
| path:mmu05020 | Prion diseases                                         | 0.004 | 0.004 | 0.615 | 0.980 | 1.064 | Stip1                                                |
| path:mmu05212 | Pancreatic cancer                                      | 0.009 | 0.009 | 0.619 | 0.980 | 0.964 | Braf;Ralgs                                           |
| path:mmu04670 | Leukocyte transendothelial migration                   | 0.013 | 0.014 | 0.621 | 0.980 | 0.943 | Arhgap5;Cldn4;Vcam1                                  |
| path:mmu03410 | Base excision repair                                   | 0.004 | 0.004 | 0.626 | 0.980 | 1.033 | Neil2                                                |
| path:mmu00051 | Fructose and mannose metabolism                        | 0.004 | 0.004 | 0.626 | 0.980 | 1.033 | Fpgt                                                 |
| path:mmu03030 | DNA replication                                        | 0.004 | 0.004 | 0.626 | 0.980 | 1.033 | Pola1                                                |
| path:mmu01524 | Platinum drug resistance                               | 0.009 | 0.009 | 0.626 | 0.980 | 0.952 | Fasl;Gsta3                                           |
| path:mmu05100 | Bacterial invasion of epithelial cells                 | 0.009 | 0.009 | 0.626 | 0.980 | 0.952 | Cblb;Sept1                                           |
| path:mmu05340 | Primary immunodeficiency                               | 0.004 | 0.004 | 0.636 | 0.980 | 1.004 | Rfxap                                                |
| path:mmu05165 | Human papillomavirus infection                         | 0.040 | 0.043 | 0.637 | 0.980 | 0.930 | Creb1;H2-M9;Rbpjl;Ube3a;Rheb;Creb5;Ccnd2;Notch4;Fasl |
| path:mmu04650 | Natural killer cell mediated cytotoxicity              | 0.013 | 0.015 | 0.639 | 0.980 | 0.919 | Braf;Fasl;Raet1b                                     |
| path:mmu05320 | Autoimmune thyroid disease                             | 0.009 | 0.010 | 0.647 | 0.980 | 0.915 | H2-M9;Fasl                                           |
| path:mmu04151 | PI3K-Akt signaling pathway                             | 0.040 | 0.044 | 0.654 | 0.980 | 0.917 | Creb1;Mtcp1;Hsp90aa1;Atf4;Rheb;Creb5;Ccnd2;Fasl;Myc  |
| path:mmu00350 | Tyrosine metabolism                                    | 0.004 | 0.005 | 0.666 | 0.980 | 0.927 | Mif                                                  |
| path:mmu04110 | Cell cycle                                             | 0.013 | 0.015 | 0.672 | 0.980 | 0.875 | Anapc10;Myc;Ccnd2                                    |
| path:mmu05323 | Rheumatoid arthritis                                   | 0.009 | 0.010 | 0.674 | 0.980 | 0.871 | Tnfsf13b;Atp6v1h                                     |
| path:mmu04975 | Fat digestion and absorption                           | 0.004 | 0.005 | 0.675 | 0.980 | 0.904 | Pla2g5                                               |
| path:mmu00260 | Glycine, serine and threonine metabolism               | 0.004 | 0.005 | 0.675 | 0.980 | 0.904 | Cth                                                  |
| path:mmu05033 | Nicotine addiction                                     | 0.004 | 0.005 | 0.675 | 0.980 | 0.904 | Chrb2                                                |

|               |                                                          |       |       |       |       |       |                                              |
|---------------|----------------------------------------------------------|-------|-------|-------|-------|-------|----------------------------------------------|
| path:mmu05205 | Proteoglycans in cancer                                  | 0.022 | 0.025 | 0.679 | 0.980 | 0.878 | Ptch1;Cblb;Braf;Fasl;Myc                     |
| path:mmu04080 | Neuroactive ligand-receptor interaction                  | 0.031 | 0.035 | 0.679 | 0.980 | 0.888 | Htr6;Thra;Lepr;Cysltr2;Gpr83;Chrb2;Adcyap1r1 |
| path:mmu04216 | Ferroptosis                                              | 0.004 | 0.005 | 0.684 | 0.980 | 0.882 | Acsl3                                        |
| path:mmu04022 | cGMP-PKG signaling pathway                               | 0.018 | 0.021 | 0.688 | 0.980 | 0.861 | Creb1;Creb5;Prkg1;Atf4                       |
| path:mmu04540 | Gap junction                                             | 0.009 | 0.011 | 0.693 | 0.980 | 0.841 | Prkg1;Gja1                                   |
| path:mmu05225 | Hepatocellular carcinoma                                 | 0.018 | 0.021 | 0.697 | 0.980 | 0.851 | Braf;Nfe2l2;Gsta3;Myc                        |
| path:mmu04140 | Autophagy                                                | 0.013 | 0.016 | 0.703 | 0.980 | 0.834 | Rb1cc1;Uvrag;Rheb                            |
| path:mmu05416 | Viral myocarditis                                        | 0.009 | 0.011 | 0.705 | 0.980 | 0.822 | H2-M9;Cd55                                   |
| path:mmu04926 | Relaxin signaling pathway                                | 0.013 | 0.016 | 0.708 | 0.980 | 0.828 | Creb1;Creb5;Atf4                             |
| path:mmu03420 | Nucleotide excision repair                               | 0.004 | 0.005 | 0.710 | 0.980 | 0.822 | Gtf2h1                                       |
| path:mmu05168 | Herpes simplex infection                                 | 0.022 | 0.026 | 0.715 | 0.980 | 0.841 | H2-M9;Il12a;Fasl;Sp100;Taf9b                 |
| path:mmu04728 | Dopaminergic synapse                                     | 0.013 | 0.016 | 0.722 | 0.980 | 0.810 | Creb1;Creb5;Atf4                             |
| path:mmu04657 | IL-17 signaling pathway                                  | 0.009 | 0.011 | 0.722 | 0.980 | 0.795 | Fos1;Hsp90aa1                                |
| path:mmu01522 | Endocrine resistance                                     | 0.009 | 0.011 | 0.733 | 0.980 | 0.778 | Braf;Notch4                                  |
| path:mmu04550 | Signaling pathways regulating pluripotency of stem cells | 0.013 | 0.017 | 0.736 | 0.980 | 0.792 | Hesx1;Myc;Bmi1                               |
| path:mmu04930 | Type II diabetes mellitus                                | 0.004 | 0.006 | 0.741 | 0.980 | 0.753 | Pklr                                         |
| path:mmu04640 | Hematopoietic cell lineage                               | 0.009 | 0.012 | 0.744 | 0.980 | 0.761 | Cd55;Cd24a                                   |
| path:mmu00510 | N-Glycan biosynthesis                                    | 0.004 | 0.006 | 0.748 | 0.980 | 0.738 | St6gal2                                      |
| path:mmu04979 | Cholesterol metabolism                                   | 0.004 | 0.006 | 0.748 | 0.980 | 0.738 | Apoc3                                        |
| path:mmu00071 | Fatty acid degradation                                   | 0.004 | 0.006 | 0.755 | 0.980 | 0.723 | Acsl3                                        |
| path:mmu04218 | Cellular senescence                                      | 0.018 | 0.023 | 0.762 | 0.980 | 0.778 | H2-M9;Myc;Ccnd2;Rheb                         |
| path:mmu00330 | Arginine and proline metabolism                          | 0.004 | 0.006 | 0.762 | 0.980 | 0.709 | Ckb                                          |
| path:mmu01212 | Fatty acid metabolism                                    | 0.004 | 0.006 | 0.768 | 0.980 | 0.695 | Acsl3                                        |
| path:mmu05142 | Chagas disease (American trypanosomiasis)                | 0.009 | 0.012 | 0.774 | 0.980 | 0.716 | Il12a;Fasl                                   |
| path:mmu04072 | Phospholipase D signaling pathway                        | 0.013 | 0.018 | 0.778 | 0.980 | 0.738 | Dgki;Ralgs;Rheb                              |
| path:mmu04261 | Adrenergic signaling in cardiomyocytes                   | 0.013 | 0.018 | 0.778 | 0.980 | 0.738 | Creb1;Creb5;Atf4                             |
| path:mmu04923 | Regulation of lipolysis in adipocytes                    | 0.004 | 0.007 | 0.787 | 0.980 | 0.657 | Prkg1                                        |
| path:mmu05016 | Huntington's disease                                     | 0.018 | 0.024 | 0.790 | 0.980 | 0.746 | Creb1;Dnah17;Creb5;Dnah2                     |
| path:mmu04150 | mTOR signaling pathway                                   | 0.013 | 0.019 | 0.801 | 0.980 | 0.709 | Braf;Atp6v1h;Rheb                            |
| path:mmu04390 | Hippo signaling pathway                                  | 0.013 | 0.019 | 0.804 | 0.980 | 0.704 | Amot;Myc;Ccnd2                               |



|               |                                                   |       |       |       |       |       |                             |
|---------------|---------------------------------------------------|-------|-------|-------|-------|-------|-----------------------------|
| path:mmu05145 | Toxoplasmosis                                     | 0.009 | 0.013 | 0.805 | 0.980 | 0.670 | Il12a;Hspa8                 |
| path:mmu05034 | Alcoholism                                        | 0.018 | 0.024 | 0.806 | 0.980 | 0.727 | Braf;Creb1;Creb5;Atf4       |
| path:mmu04510 | Focal adhesion                                    | 0.018 | 0.024 | 0.806 | 0.980 | 0.727 | Braf;Arhgap5;Parvb;Ccnd2    |
| path:mmu00561 | Glycerolipid metabolism                           | 0.004 | 0.007 | 0.820 | 0.980 | 0.593 | Dgki                        |
| path:mmu04213 | Longevity regulating pathway                      | 0.004 | 0.008 | 0.825 | 0.980 | 0.583 | Hspa8                       |
| path:mmu04137 | Mitophagy                                         | 0.004 | 0.008 | 0.830 | 0.980 | 0.574 | Atf4                        |
| path:mmu05217 | Basal cell carcinoma                              | 0.004 | 0.008 | 0.830 | 0.980 | 0.574 | Ptch1                       |
| path:mmu04114 | Oocyte meiosis                                    | 0.009 | 0.014 | 0.836 | 0.980 | 0.623 | Anapc10;Pgr                 |
| path:mmu04530 | Tight junction                                    | 0.013 | 0.021 | 0.846 | 0.980 | 0.650 | Amot;Mpp4;Cldn4             |
| path:mmu05140 | Leishmaniasis                                     | 0.004 | 0.008 | 0.848 | 0.980 | 0.540 | Il12a                       |
| path:mmu05164 | Influenza A                                       | 0.013 | 0.021 | 0.849 | 0.980 | 0.646 | Il12a;Fasl;Hspa8            |
| path:mmu04514 | Cell adhesion molecules (CAMs)                    | 0.013 | 0.021 | 0.852 | 0.980 | 0.642 | H2-M9;Cldn4;Vcam1           |
| path:mmu04622 | RIG-I-like receptor signaling pathway             | 0.004 | 0.008 | 0.853 | 0.980 | 0.532 | Il12a                       |
| path:mmu05167 | Kaposi's sarcoma-associated herpesvirus infection | 0.018 | 0.027 | 0.856 | 0.980 | 0.667 | Creb1;H2-M9;Myc;Ccr8        |
| path:mmu05211 | Renal cell carcinoma                              | 0.004 | 0.008 | 0.857 | 0.980 | 0.524 | Braf                        |
| path:mmu04611 | Platelet activation                               | 0.009 | 0.015 | 0.862 | 0.980 | 0.583 | Prkg1;Tbxas1                |
| path:mmu05214 | Glioma                                            | 0.004 | 0.009 | 0.865 | 0.980 | 0.509 | Braf                        |
| path:mmu04520 | Adherens junction                                 | 0.004 | 0.009 | 0.868 | 0.980 | 0.502 | Lmo7                        |
| path:mmu04917 | Prolactin signaling pathway                       | 0.004 | 0.009 | 0.868 | 0.980 | 0.502 | Ccnd2                       |
| path:mmu04380 | Osteoclast differentiation                        | 0.009 | 0.016 | 0.874 | 0.980 | 0.565 | Creb1;Fosl1                 |
| path:mmu05133 | Pertussis                                         | 0.004 | 0.009 | 0.883 | 0.980 | 0.476 | Il12a                       |
| path:mmu05218 | Melanoma                                          | 0.004 | 0.009 | 0.883 | 0.980 | 0.476 | Braf                        |
| path:mmu04970 | Salivary secretion                                | 0.004 | 0.010 | 0.889 | 0.980 | 0.464 | Prkg1                       |
| path:mmu05132 | Salmonella infection                              | 0.004 | 0.010 | 0.889 | 0.980 | 0.464 | Dync2h1                     |
| path:mmu00190 | Oxidative phosphorylation                         | 0.009 | 0.016 | 0.890 | 0.980 | 0.540 | Cox10;Atp6v1h               |
| path:mmu05160 | Hepatitis C                                       | 0.009 | 0.016 | 0.890 | 0.980 | 0.540 | Braf;Cldn4                  |
| path:mmu05206 | MicroRNAs in cancer                               | 0.022 | 0.035 | 0.894 | 0.980 | 0.643 | Ccng1;Ccnd2;Notch4;Myc;Bmi1 |
| path:mmu01521 | EGFR tyrosine kinase inhibitor resistance         | 0.004 | 0.010 | 0.895 | 0.980 | 0.452 | Braf                        |
| path:mmu04014 | Ras signaling pathway                             | 0.018 | 0.029 | 0.899 | 0.980 | 0.610 | Ralgds;Fasl;Pla2g5;Pla2g6   |
| path:mmu04350 | TGF-beta signaling pathway                        | 0.004 | 0.010 | 0.909 | 0.980 | 0.425 | Myc                         |

|               |                                                      |       |       |       |       |       |                                                                                                                                                                                         |
|---------------|------------------------------------------------------|-------|-------|-------|-------|-------|-----------------------------------------------------------------------------------------------------------------------------------------------------------------------------------------|
| path:mmu04062 | Chemokine signaling pathway                          | 0.013 | 0.024 | 0.911 | 0.980 | 0.556 | Braf;Cx3cr1;Ccr8                                                                                                                                                                        |
| path:mmu04666 | Fc gamma R-mediated phagocytosis                     | 0.004 | 0.011 | 0.914 | 0.980 | 0.416 | Pla2g6                                                                                                                                                                                  |
| path:mmu04610 | Complement and coagulation cascades                  | 0.004 | 0.011 | 0.916 | 0.980 | 0.411 | Cd55                                                                                                                                                                                    |
| path:mmu04912 | GnRH signaling pathway                               | 0.004 | 0.011 | 0.919 | 0.980 | 0.406 | Atf4                                                                                                                                                                                    |
| path:mmu05222 | Small cell lung cancer                               | 0.004 | 0.011 | 0.925 | 0.980 | 0.393 | Myc                                                                                                                                                                                     |
| path:mmu05226 | Gastric cancer                                       | 0.009 | 0.019 | 0.930 | 0.980 | 0.470 | Braf;Myc                                                                                                                                                                                |
| path:mmu04070 | Phosphatidylinositol signaling system                | 0.004 | 0.012 | 0.937 | 0.980 | 0.369 | Dgki                                                                                                                                                                                    |
| path:mmu04015 | Rap1 signaling pathway                               | 0.013 | 0.026 | 0.938 | 0.980 | 0.509 | Braf;Ralgds;Magi2                                                                                                                                                                       |
| path:mmu04620 | Toll-like receptor signaling pathway                 | 0.004 | 0.012 | 0.939 | 0.980 | 0.365 | Il12a                                                                                                                                                                                   |
| path:mmu04916 | Melanogenesis                                        | 0.004 | 0.012 | 0.941 | 0.980 | 0.362 | Creb1                                                                                                                                                                                   |
| path:mmu04933 | AGE-RAGE signaling pathway in diabetic complications | 0.004 | 0.012 | 0.941 | 0.980 | 0.362 | Vcam1                                                                                                                                                                                   |
| path:mmu04621 | NOD-like receptor signaling pathway                  | 0.009 | 0.021 | 0.950 | 0.980 | 0.430 | Dhx33;Hsp90aa1                                                                                                                                                                          |
| path:mmu04066 | HIF-1 signaling pathway                              | 0.004 | 0.013 | 0.950 | 0.980 | 0.341 | Pdha2                                                                                                                                                                                   |
| path:mmu05010 | Alzheimer's disease                                  | 0.009 | 0.022 | 0.957 | 0.980 | 0.413 | Aph1b;Aph1c                                                                                                                                                                             |
| path:mmu04217 | Necroptosis                                          | 0.009 | 0.022 | 0.959 | 0.980 | 0.409 | Fasl;Hsp90aa1                                                                                                                                                                           |
| path:mmu04724 | Glutamatergic synapse                                | 0.004 | 0.014 | 0.960 | 0.980 | 0.317 | Trpc1                                                                                                                                                                                   |
| path:mmu04020 | Calcium signaling pathway                            | 0.009 | 0.022 | 0.965 | 0.981 | 0.395 | Cysltr2;Htr6                                                                                                                                                                            |
| path:mmu04750 | Inflammatory mediator regulation of TRP channels     | 0.004 | 0.015 | 0.971 | 0.983 | 0.289 | Pla2g6                                                                                                                                                                                  |
| path:mmu04371 | Apelin signaling pathway                             | 0.004 | 0.017 | 0.980 | 0.989 | 0.260 | Klf2                                                                                                                                                                                    |
| path:mmu04740 | Olfactory transduction                               | 0.084 | 0.138 | 0.995 | 0.998 | 0.612 | Olftr320; Olftr706; Olftr700;Olftr693;Olftr524;Olftr560;Olftr358;Olftr391ps;<br>Olftr870; Olftr139;Olftr736;Olftr1306;Olftr156;Olftr1170;Olftr502;Prkg1;Olftr103;<br>Olftr340;Olftr1226 |
| path:mmu04810 | Regulation of actin cytoskeleton                     | 0.004 | 0.026 | 0.998 | 0.998 | 0.169 | Braf                                                                                                                                                                                    |

**Table S3. Go enrichment of the differentially expressed proteins in aortas from CIH-treated mice.**

| Term_ID    | Term description                           | Bg Ratio | P_value  | Category | Fold     | GeneSymbols                                                                                                                                                                                                                                                                                                                                                                                                                                                                                                                                                                                                         |
|------------|--------------------------------------------|----------|----------|----------|----------|---------------------------------------------------------------------------------------------------------------------------------------------------------------------------------------------------------------------------------------------------------------------------------------------------------------------------------------------------------------------------------------------------------------------------------------------------------------------------------------------------------------------------------------------------------------------------------------------------------------------|
| GO:0006355 | regulation of transcription, DNA-templated | 8.81E-02 | 1.06E-07 | Process  | 1.72E+00 | Gtf2a1;Rbpjl;Dlx6;Rbak;Zfx;Rnf2;Klf16;Npat;Zbtb46;Mllt3;Rrn3;Trim33;Rfx6;Thra;Pou6f1;Rb1cc1;Myf6;Ctnnd2;Zfp37;Nfyb;Nsd1;Tal1;Creb5;Klf2;EU599041;Kdm4c;Adnp2;Myc;Cnc;Zfp329;Ctr9;Onecut2;Ctcf;Gm14409;Zfp229;Cep290;Zfp72;Zfp131;Med19;Safb2;Ikzf5;Zfp62;Irf6;Esf1;Zfp874a;Zfp521;Gtf2h1;Zfp119b;Sox14;Zfp518a;Ybx1;Churc1;Fasl;Kmt5b;Creb1;Pgr;Taf1b;Zfp53;Mphosph8;Bsx;Nfe2l2;Elp4;Vgll2;Pspc1;Hspa8;Hesx1;Notch4;Eaf1;Prop1;Atf4;Gpbp1;Zfp60;Itgb3bp;Khdrbs2;Ezh1;Zfp654;Btf3;Myt1;Taf9b;Tle3;Fosl1;Cited1;Zfp281;2610044O15Rik8;Brd8;Bmi1;Igsf1;Nol11;Prmt3;Cdy1;Cbx7;2410141K09Rik;Ikzf3;Zfp780b;Zfp322a;Sp100 |
| GO:0006351 | transcription, DNA-templated               | 7.89E-02 | 3.35E-06 | Process  | 1.66E+00 | Gtf2a1;Rbpjl;Cnc;Polr3k;Btf3;Sox14;Zfp518a;Ybx1;Churc1;Rbak;Myt1;Zfp329;Zfx;Rnf2;Ctr9;Fasl;Klf16;Onecut2;Kmt5b;Taf9b;Creb1;Tle3;Sp100;Pgr;Ctcf;Adnp2;Cited1;Zfp281;Npat;Swi1;Taf1b;Mphosph8;Brd8;Zbtb46;Bsx;Cep290;Zfp131;Nfe2l2;Med19;Mllt3;Rrn3;Trim33;Bmi1;Rfx6;Thra;Ikzf5;Safb2;Nol11;Zfp62;Pou6f1;Rb1cc1;Elp4;Vgll2;Fubp3;Irf6;Esf1;Pspc1;Ctnnd2;Hesx1;Cdy1;Hspa8;Zfp37;Eaf1;Notch4;Cbx7;Nfyb;Nsd1;Tal1;Atf4;Ikzf3;Creb5;Gpbp1;Klf2;Kdm4c;Itgb3bp;Zfp521;Gtf2h1;Khdrbs2;Zfp322a;Ezh1;Zfp654;Polr1d;Myc                                                                                                         |

|            |                                      |          |          |           |          |                                                                                                                                                                                                                                                                                                                                                                                                                                                                                                                                                                                                                                                                                                                                                                                                                                                                                                                                                                                                                                                                                                                                                                                                                                                                                                                |
|------------|--------------------------------------|----------|----------|-----------|----------|----------------------------------------------------------------------------------------------------------------------------------------------------------------------------------------------------------------------------------------------------------------------------------------------------------------------------------------------------------------------------------------------------------------------------------------------------------------------------------------------------------------------------------------------------------------------------------------------------------------------------------------------------------------------------------------------------------------------------------------------------------------------------------------------------------------------------------------------------------------------------------------------------------------------------------------------------------------------------------------------------------------------------------------------------------------------------------------------------------------------------------------------------------------------------------------------------------------------------------------------------------------------------------------------------------------|
| GO:0005634 | nucleus                              | 2.48E-01 | 7.35E-06 | Component | 1.30E+00 | Gtf2a1;Rbpjl;Dlx6;Lamp3;Fam206a;Rbak;Azin1;Zfx;Rnf2;Rbm22;Crnk11;Ppm1a;Klf16;Tax1bp3;Ube2w;Zscan5b;Tek5;Npat;Rfxap;Top3a;Zbtb46;Mllt3;Rrn3;Bex4;Trim33;Rfx6;Thra;Ube3a;Luc7l2;Pou6f1;Sf3a3;Sesn3;Rb1cc1;Dhx33;Myf6;Lmo2;Ctnnd2;Ugdh;Dcps;Zfp37;Pygo1;Nfyb;Nsd1;Tal1;Ncbp2;Creb5;Exosc3;Klf2;Herc6;Kdm4c;Nckipsd;4933402N03Rik;Bag3;Blm;Fubp3;Vps37a;Cul5;Myc;Ppwd1;Lsm5;Adnp2;Ccnc;Acd;Zfp329;Txndc9;Ralgapa2;Ctr9;Onecut2;Crbn;Pdc13;Ctcf;Dyrk1a;N4bp2l2;Ube2c;Stip1;Plpp7;Cep290;Zfp72;Zfp131;Med19;Tex10;Senp7;Safb2;Ikzf5;Pola1;Zfp62;Ralgds;Cblb;Cps1;Irf6;Esf1;Padi6;Ing1;Igf2bp3;Lemd3;Ubqln1;Dusp1;Anp32e;Zfp521;Gtf2h1;Miat;Braf;Ybey;Mettl3;Strbp;Polr3k;Zfp119b;Toe1;Ptch1;Sox14;Zfp518a;Ybx1;Churc1;Zfp438;Fasl;Kmt5b;Creb1;Pgr;Rev1;Hmgn2;Taf1b;Mphosph8;Bsx;Sf3b6;Nfe2l2;Kpnb1;Mif;Cacybp;Malt1;Thoc2;Elp4;Vgll2;Brix1;Pym1;Mpo;Pspc1;Hspa8;Ipo7;Tc2n;Ckb;Hesx1;Eaf1;Notch4;Prop1;Zfp106;Wtap;Neil2;Atf4;Gbbp1;G2e3;Ccng1;Umps;Zfp60;Escol1;Dgki;Itgb3bp;Magohb;Khdrbs2;Ezh1;Zfp654;Ssfa2;Naa50;Btf3;Vldlr;Nfkbie;Mcm8;Gtf3c3;Pus7;Gnpda2;Cep350;Magi2;Ccnd2;Myt1;Nol10;Morn2;Uba3;Taf9b;Sde2;Tle3;Fosl1;Cited1;Lsg1;Zfp281;Swt1;Brd8;Bmi1;Appbp2;Gm54l5;Enoph1;Ifrd2;Nol11;Arhgap27;Krr1;Gar1;Cdy1;Cmas;Cbx7;Hsp90aa1;Aurkb;Ikzf3;Nup37;Serpib9;Prkx;Zfp322a;Cecr2;Polr1d;Wrn;Sp100;Rbm8a;Kpna4 |
| GO:0051782 | negative regulation of cell division | 2.97E-04 | 1.69E-05 | Process   | 2.13E+01 | Ptch1;Intu;Myc;Blm                                                                                                                                                                                                                                                                                                                                                                                                                                                                                                                                                                                                                                                                                                                                                                                                                                                                                                                                                                                                                                                                                                                                                                                                                                                                                             |
| GO:0003676 | nucleic acid binding                 | 3.64E-02 | 8.26E-05 | Function  | 1.85E+00 | Polr3k;Toe1;Zfp518a;Ybx1;Rbak;Zfp329;Zfx;Rbm22;Klf16;Eea1;Ctcf;Zfp281;Top3a;Zbtb46;Sf3b6;Zfp131;Safb2;Ikzf5;Pola1;Zfp62;Sf3a3;Zcchc2;Dhx33;Zcchc10;Krr1;Rbsn;Pspc1;Zfp37;Igf2bp3;Lemd3;Zfp106;Neil2;Ncbp2;Ikzf3;Zfp60;Klf2;Zfp521;Zfp322a;Khdrbs2;Blm;Wrn;Zfp654;Adnp2                                                                                                                                                                                                                                                                                                                                                                                                                                                                                                                                                                                                                                                                                                                                                                                                                                                                                                                                                                                                                                         |
| GO:0061077 | chaperone-mediated protein folding   | 1.86E-03 | 1.58E-04 | Process   | 5.92E+00 | Cct6a;Cct7;Cct4;Hspd1;Hspa8;Chordc1;Canx                                                                                                                                                                                                                                                                                                                                                                                                                                                                                                                                                                                                                                                                                                                                                                                                                                                                                                                                                                                                                                                                                                                                                                                                                                                                       |

|            |                                                           |          |          |          |          |                                                                                                                                                                                                                                                                                                                                                                                                                                                                                                                                                                                                                                                                                                                                                                                                                                                                                                                                                                                                                                                                 |
|------------|-----------------------------------------------------------|----------|----------|----------|----------|-----------------------------------------------------------------------------------------------------------------------------------------------------------------------------------------------------------------------------------------------------------------------------------------------------------------------------------------------------------------------------------------------------------------------------------------------------------------------------------------------------------------------------------------------------------------------------------------------------------------------------------------------------------------------------------------------------------------------------------------------------------------------------------------------------------------------------------------------------------------------------------------------------------------------------------------------------------------------------------------------------------------------------------------------------------------|
| GO:0005515 | protein binding                                           | 2.09E-01 | 2.06E-04 | Function | 1.28E+00 | Gtf2a1;Cct7;Tff1;Rnf2;Sfrp1;Tax1bp3;Lin7c;Ube2w;Pkd2;Epha5;Zbtb46;Mllt3;Trim33;Rfx6;Sema3a;Thra;Ube3a;Rb1cc1;Sesn3;Tada2b;Lmo2;Capza2;Sptbn4;Pygo1;Ccr8;Anapc10;Nsd1;Slc7a9;Tal1;Btg3;Klf2;Bag3;Stap2;Blm;Prkg1;Slc5a2;Cul5;Myc;Lsm5;Chrb2;Htr6;Alk;Acd;Cct4;Ctr9;Ctcf;Dyrk1a;N4bp2l2;Hpca;Stip1;Nup153;Cep290;Bbs9;Med19;Senp7;Kctd12;Pola1;Gstk1;Ralgds;Cblb;Cps1;Padi6;Ccm2;Igf2bp3;Tspan13;Cd96;Raet1b;Miat;Braf;Khdc1b;Cct6a;Mettl3;Ptch1;Sema4g;Ybx1;Ppfia4;Reep5;Il12a;Canx;Creb1;Rpl39;Pgr;Rev1;Taf1b;Zfp53;Ift81;Csf2rb;Bsx;Nfe2l2;Exoc3l;Kpnb1;Parvb;Gja1;Cacybp;Malt1;Thoc2;Vgll2;Usp33;Stoml3;Pspc1;Hspa8;Ipo7;Hesx1;Ckb;Myo16;Notch4;Prop1;Il12rb1;Wtap;Dhh;Cd24a;Atf4;Scn8a;Gpbp1;Tmem178;Trpc1;Khdrbs2;Cit;Ezh1;Cldn4;Cdh23;Naa50;Lepr;Nfkbie;Siglecg;Vldlr;Cep350;Magi2;Ccnd2;Myt1;Dnah17;Uba3;Adam5;Eea1;Tle3;Cep55;Tom1l1;Cited1;Zfp281;Tmem108;Actn2;Trip13;Adcyap1r1;Amot;Appbp2;Bmi1;Trim38;Uvrag;Spatc1;Map2;Prmt3;Snx1;Gar1;Dusp19;Fndc5;Slc9c1;Cbx7;Bfsp2;Hsp90aa1;Aurkb;Ikzf3;Cth;Mpv17l;Plxdc1;Serpib9;Wrn;Polr1d;Kpna4;Sp100;Chordc1 |
| GO:0005540 | hyaluronic acid binding                                   | 1.00E-03 | 3.59E-04 | Function | 7.84E+00 | Stab1;Impg2;Tnfaip6;Hapln4;Stab2                                                                                                                                                                                                                                                                                                                                                                                                                                                                                                                                                                                                                                                                                                                                                                                                                                                                                                                                                                                                                                |
| GO:0006458 | 'de novo' protein folding                                 | 5.93E-04 | 4.17E-04 | Process  | 1.06E+01 | Cct6a;Hspd1;Cct4;Cct7                                                                                                                                                                                                                                                                                                                                                                                                                                                                                                                                                                                                                                                                                                                                                                                                                                                                                                                                                                                                                                           |
| GO:0060509 | Type I pneumocyte differentiation                         | 2.97E-04 | 6.23E-04 | Process  | 1.60E+01 | Creb1;Thra;Klf2                                                                                                                                                                                                                                                                                                                                                                                                                                                                                                                                                                                                                                                                                                                                                                                                                                                                                                                                                                                                                                                 |
| GO:0044183 | protein binding involved in protein folding               | 1.13E-03 | 6.54E-04 | Function | 6.94E+00 | Cct6a;Pdcl3;Cct7;Cct4;Hspd1                                                                                                                                                                                                                                                                                                                                                                                                                                                                                                                                                                                                                                                                                                                                                                                                                                                                                                                                                                                                                                     |
| GO:0072341 | modified amino acid binding                               | 3.05E-04 | 6.83E-04 | Function | 1.55E+01 | Cps1;Mut;Prmt3                                                                                                                                                                                                                                                                                                                                                                                                                                                                                                                                                                                                                                                                                                                                                                                                                                                                                                                                                                                                                                                  |
| GO:0045893 | positive regulation of transcription, DNA-templated       | 2.53E-02 | 8.21E-04 | Process  | 1.87E+00 | Rbpjl;Ptch1;Churc1;Sfrp1;Ppm1a;Creb1;Pgr;Ctcf;Cited1;Zfp281;Npat;Rfxap;Cep290;Nfe2l2;Mllt3;Rrn3;Rfx6;Myf6;Irf6;Ing1;Nfyb;Nsd1;Tal1;Atf4;Creb5;Gpbp1;Klf2;Blm;Fubp3;Myc                                                                                                                                                                                                                                                                                                                                                                                                                                                                                                                                                                                                                                                                                                                                                                                                                                                                                          |
| GO:1904871 | positive regulation of protein localization to Cajal body | 3.39E-04 | 9.77E-04 | Process  | 1.40E+01 | Cct6a;Cct4;Cct7                                                                                                                                                                                                                                                                                                                                                                                                                                                                                                                                                                                                                                                                                                                                                                                                                                                                                                                                                                                                                                                 |

|            |                                                                                   |          |          |           |          |                                                                                                    |
|------------|-----------------------------------------------------------------------------------|----------|----------|-----------|----------|----------------------------------------------------------------------------------------------------|
| GO:0005929 | cilium                                                                            | 1.13E-02 | 1.26E-03 | Component | 2.31E+00 | Htr6;Ptch1;Pkd2;Lca5;Ttl9;Dync2h1;Stoml3;Dnah17;Tulp4;Dnah2;Cep290;Cct4;Bbs9;Slc9c1;Rp1;Ift81;Umod |
| GO:0050667 | homocysteine<br>metabolic process                                                 | 3.81E-04 | 1.44E-03 | Process   | 1.24E+01 | Cth;Cps1;Mut                                                                                       |
| GO:1904851 | positive regulation<br>of establishment of<br>protein localization<br>to telomere | 3.81E-04 | 1.44E-03 | Process   | 1.24E+01 | Cct6a;Cct4;Cct7                                                                                    |
| GO:0045292 | mRNA cis splicing,<br>via spliceosome                                             | 3.81E-04 | 1.44E-03 | Process   | 1.24E+01 | Dcps;Rbm22;Ncbp2                                                                                   |
| GO:0042026 | protein refolding                                                                 | 3.81E-04 | 1.44E-03 | Process   | 1.24E+01 | Hsp90aa1;Hspd1;Hspa8                                                                               |
| GO:0046850 | regulation of bone<br>remodeling                                                  | 3.81E-04 | 1.44E-03 | Process   | 1.24E+01 | Lepr;Suco;Gja1                                                                                     |
| GO:0030644 | cellular chloride ion<br>homeostasis                                              | 3.81E-04 | 1.44E-03 | Process   | 1.24E+01 | Ckb;Fasl;Tbxas1                                                                                    |
| GO:0032212 | positive regulation<br>of telomere<br>maintenance via<br>telomerase               | 1.36E-03 | 1.52E-03 | Process   | 5.82E+00 | Cct6a;Aurkb;Cct7;Acid;Cct4                                                                         |
| GO:0000184 | nuclear-transcribed<br>mRNA catabolic<br>process, nonsense-<br>mediated decay     | 1.36E-03 | 1.52E-03 | Process   | 5.82E+00 | Ncbp2;Gspt1;Magohb;Pym1;Rbm8a                                                                      |
| GO:0051082 | unfolded protein<br>binding                                                       | 3.49E-03 | 1.68E-03 | Function  | 3.61E+00 | Cct6a;Hsp90aa1;Cct7;Hspe1;Cct4;Hspa8;Hspd1;Canx                                                    |
| GO:0044297 | cell body                                                                         | 4.22E-03 | 1.69E-03 | Component | 3.29E+00 | Cct6a;Cct7;Cacybp;Map2;Alk;Usp33;Cct4;Rdh10;Braf                                                   |
| GO:0051973 | positive regulation<br>of telomerase<br>activity                                  | 1.40E-03 | 1.75E-03 | Process   | 5.64E+00 | Hsp90aa1;Aurkb;Acid;Cct4;Myc                                                                       |

|            |                               |    |          |          |           |          |                                                                                                                                                                                                                                                                                                                                                                                                                                                                                                                                                                                                                                                                                                                                                                                                                                                                                                                                                                                                                                                                                                                                                                                                                                                                                                         |
|------------|-------------------------------|----|----------|----------|-----------|----------|---------------------------------------------------------------------------------------------------------------------------------------------------------------------------------------------------------------------------------------------------------------------------------------------------------------------------------------------------------------------------------------------------------------------------------------------------------------------------------------------------------------------------------------------------------------------------------------------------------------------------------------------------------------------------------------------------------------------------------------------------------------------------------------------------------------------------------------------------------------------------------------------------------------------------------------------------------------------------------------------------------------------------------------------------------------------------------------------------------------------------------------------------------------------------------------------------------------------------------------------------------------------------------------------------------|
| GO:0005737 | cytoplasm                     |    | 2.67E-01 | 2.11E-03 | Component | 1.19E+00 | Gtf2a1;Cct7;Ttl19;Dennd6a;Azin1;Tff1;Rbm22;Ppm1a;Tax1bp3;Stab1;Lin7c;Serpinb6c;Intu;Pkd2;Slc23a3;Ube2w;Npat;Tnfsf13b;Bex4;Thra;Vash1;Ube3a;Rb1cc1;Dhx33;Sesn3;Snx16;Sbk1;Sptbn4;Dcps;Dync2h1;Fbx114;Dennd2d;Anapc10;Ncbp2;Btg3;Exosc3;Herc6;Nyx;Bag3;Stap2;Blm;Clmn;Prkg1;Fubp3;Cul5;Myc;Lsm5;Fabp6;Amdhd1;Arhgap5;Idh1;Hspe1;Alox12b;Txndc9;Ralgapa2;Cct4;Ppp6r2;Rp1;Crbn;Cep112;Ttc7;Pdcl3;Aprt;Hpca;Ube2c;Cfap61;Stip1;Cep5711;Rdh10;Cep290;Bbs9;Tex10;Cst13;Eml6;Safb2;Pola1;Pla2g6;Ralgds;Cblb;Cps1;Irf6;Padi6;Stab2;Ccm2;Igf2bp3;Cd96;Ubqln1;Dusp1;Anp32e;Braf;Txndc2;Khdc1b;Cct6a;Mettl3;Strbp;Pdlim2;Pklr;Toe1;Ppih;Ybx1;Riok1;Scel;Il12a;Arhgef16;Canx;Mpp4;Pgr;2310050C09Rik;Mphosph8;Bsx;Ythdf1;Nfe2l2;Kpn1;Mif;Parvb;Gja1;Cacybp;Malt1;Elp4;Vgl2;Usp33;Pym1;Pspc1;Hspa8;Ipo7;Shpk;Ckb;Fam126a;Myo16;Tulp4;Zfp106;Angel2;Neil2;Atf4;Copg1;G2e3;Umps;Zfp185;Sprr4;Dgki;Trpc1;Fgd4;Cit;Dnah2;Ssfa2;Naa50;Btf3;Nfkbie;Gnpda2;Cep350;Magi2;Ccnd2;Pex1;Dnah17;Uba3;Fpgt;Eea1;Agbl3;Cep55;Tom111;Cited1;Lsg1;Npl;Actn2;Sept1;Hspd1;Adcyap1r1;Amot;Appbp2;Sept4;Bmi1;Gsta3;Enoph1;Trim13;Spatc1;Zcchc2;Map2;Prmt3;Chil6;Arhgap27;Snx1;Krr1;Sgsm2;Dusp19;Bgn;Bfsp2;Sept10;Hsp90aa1;Aurkb;Lca5;Hrasls;Rheb;Cth;Ikzf3;Plxdc1;Mpv171;Serpinb9;Ppp1r2;Cplx2;Prkx;Zfp322a;Wrn;Kpna4;Sp100;Zfand5;Trappc21 |
| GO:0061436 | establishment of skin barrier | of | 8.90E-04 | 2.15E-03 | Process   | 7.09E+00 | Flg;Alox12b;Cldn4;Cela2a                                                                                                                                                                                                                                                                                                                                                                                                                                                                                                                                                                                                                                                                                                                                                                                                                                                                                                                                                                                                                                                                                                                                                                                                                                                                                |
| GO:0046872 | metal ion binding             |    | 1.31E-01 | 2.33E-03 | Function  | 1.30E+00 | Rbak;Zfx;Rnf2;Rbm22;Ppm1a;Klf16;Rnf139;Pkd2;Adam26a;Top3a;Zbtb46;Fstl5;Trim33;Thra;Ube3a;Sf3a3;Lmo2;Zfp37;Pygo1;Nsd1;Adamts20;Klf2;Kdm4c;Blm;Adnp2;Amdhd1;Idh1;Hspe1;Alox12b;Zfp329;Crbn;Bpnt1;Ctcf;Hpca;Zfp131;Tbxas1;Mob3c;Ikzf5;Pola1;Zfp62;Rptn;Zc2hc1a;Rspry1;Cblb;Cps1;Ing1;Timm9;Zfp521;Braf;Ybey;Pdlim2;Pklr;Polr3k;Mmp10;Toe1;Zfp518a;Churc1;Riok1;Scel;Canx;Pon1;Pgr;Rev1;Taf1b;Usp33;Rbsn;Mpo;Zbtb8os;Zfp106;Dhh;Neil2;G2e3;Zfp60;Esco1;Zfp185;Rnf103;Atp2c1;Fgd4;Cit;Zfp654;Cyp2f2;Cdh23;Myt1;Eea1;Agbl3;Mcee;Zfp281;Zc3h12c;Actn2;Col11a1;Slc25a25;Bmi1;Enoph1;Atp11c;Trim13;Zcchc2;Pla2g5;Zcchc10;Prmt3;Mut;Atp5s;Aurkb;Rheb;Ikzf3;Zfp322a;Wrn;Zfand5;Chordc1                                                                                                                                                                                                                                                                                                                                                                                                                                                                                                                                                                                                                             |
| GO:0034399 | nuclear periphery             |    | 8.95E-04 | 2.38E-03 | Component | 6.89E+00 | Nup153;Kpn1;Map2;Atf4                                                                                                                                                                                                                                                                                                                                                                                                                                                                                                                                                                                                                                                                                                                                                                                                                                                                                                                                                                                                                                                                                                                                                                                                                                                                                   |
| GO:0005791 | rough endoplasmic reticulum   |    | 2.85E-03 | 2.47E-03 | Component | 3.78E+00 | Suco;Map2;Epha5;Canx;Myc;Hspd1;Adcyap1r1                                                                                                                                                                                                                                                                                                                                                                                                                                                                                                                                                                                                                                                                                                                                                                                                                                                                                                                                                                                                                                                                                                                                                                                                                                                                |
| GO:0045333 | cellular respiration          |    | 9.32E-04 | 2.57E-03 | Process   | 6.77E+00 | Coq10b;Slc25a25;Cox10;Sdhaf4                                                                                                                                                                                                                                                                                                                                                                                                                                                                                                                                                                                                                                                                                                                                                                                                                                                                                                                                                                                                                                                                                                                                                                                                                                                                            |

|            |                                                                     |          |          |           |          |                                                                                                                            |
|------------|---------------------------------------------------------------------|----------|----------|-----------|----------|----------------------------------------------------------------------------------------------------------------------------|
| GO:0007601 | visual perception                                                   | 5.51E-03 | 2.72E-03 | Process   | 2.86E+00 | Bfsp2;Impg2;Rgr;Sox14;Opn4;Nyx;Col11a1;Rdh10;Rp1;Chrb2                                                                     |
| GO:0005832 | chaperonin-containing T-complex                                     | 4.69E-04 | 2.94E-03 | Component | 9.86E+00 | Cct6a;Cct4;Cct7                                                                                                            |
| GO:0030879 | mammary gland development                                           | 1.61E-03 | 3.32E-03 | Process   | 4.90E+00 | Creb1;Arhgap5;Ptch1;Pgr;Notch4                                                                                             |
| GO:0071498 | cellular response to fluid shear stress                             | 5.08E-04 | 3.54E-03 | Process   | 9.31E+00 | Nfe2l2;Klf2;Pkd2                                                                                                           |
| GO:0008152 | metabolic process                                                   | 1.84E-02 | 3.56E-03 | Process   | 1.89E+00 | Pklr;Ctbs;Enpp6;Glb1l2;Ganc;Npl;Enoph1;Pla2g6;Gsta3;Cps1;Ugt2a3;Ugdh;Cdyl;Mut;Slc27a2;Neil2;Umps;Acsl3;Auh;Wrn;Prkg1;Pdha2 |
| GO:0006457 | protein folding                                                     | 4.03E-03 | 4.07E-03 | Process   | 3.13E+00 | Cct6a;Hsp90aa1;Cct7;Hspe1;Cct4;Hspa8;Hspd1;Canx                                                                            |
| GO:0042254 | ribosome biogenesis                                                 | 4.07E-03 | 4.34E-03 | Process   | 3.10E+00 | Nol11;Lsg1;Riok1;Brix1;Krr1;Gar1;Tsr3;Rrn3                                                                                 |
| GO:0005777 | peroxisome                                                          | 5.75E-03 | 4.36E-03 | Component | 2.68E+00 | Ddo;Slc27a2;Idh1;Gstk1;Hrasls;Fndc5;Mpv17l;Pex1;Acsl3;Acnat2                                                               |
| GO:0048699 | generation of neurons                                               | 5.51E-04 | 4.51E-03 | Process   | 8.59E+00 | Cit;Thoc2;Tal1                                                                                                             |
| GO:0045943 | positive regulation of transcription from RNA polymerase I promoter | 5.51E-04 | 4.51E-03 | Process   | 8.59E+00 | Dhx33;Heatr1;Atf4                                                                                                          |
| GO:0060674 | placenta blood vessel development                                   | 5.51E-04 | 4.51E-03 | Process   | 8.59E+00 | Fosl1;Vash1;Pkd2                                                                                                           |
| GO:0002199 | zona pellucida receptor complex                                     | 5.54E-04 | 4.89E-03 | Component | 8.35E+00 | Cct6a;Cct4;Cct7                                                                                                            |
| GO:0016485 | protein processing                                                  | 2.54E-03 | 5.38E-03 | Process   | 3.72E+00 | Aph1b;Pcsk1;Ptch1;Aph1c;Dync2h1;Myc                                                                                        |
| GO:0001702 | gastrulation with mouth forming second                              | 1.14E-03 | 5.54E-03 | Process   | 5.51E+00 | Amot;Ugdh;Nsd1;Rnf2                                                                                                        |



|            |                                                                                            |          |          |           |          |                                |
|------------|--------------------------------------------------------------------------------------------|----------|----------|-----------|----------|--------------------------------|
| GO:0000974 | Prp19 complex                                                                              | 5.96E-04 | 6.10E-03 | Component | 7.75E+00 | Crnk11;Rbm22;Hspa8             |
| GO:0030133 | transport vesicle                                                                          | 1.83E-03 | 6.43E-03 | Component | 4.21E+00 | Aph1b;Pigr;Atp2c1;Tmem168;Bgn  |
| GO:0007028 | cytoplasm organization                                                                     | 2.12E-04 | 6.83E-03 | Process   | 1.49E+01 | Padi6;Rrn3                     |
| GO:0036003 | positive regulation of transcription from RNA polymerase II promoter in response to stress | 2.12E-04 | 6.83E-03 | Process   | 1.49E+01 | Nfe2l2;Klf2                    |
| GO:0002904 | positive regulation of B cell apoptotic process                                            | 2.12E-04 | 6.83E-03 | Process   | 1.49E+01 | Cd24a;Myc                      |
| GO:0090238 | positive regulation of arachidonic acid secretion                                          | 2.12E-04 | 6.83E-03 | Process   | 1.49E+01 | Mif;Pla2g6                     |
| GO:0008616 | queuosine biosynthetic process                                                             | 2.12E-04 | 6.83E-03 | Process   | 1.49E+01 | Txndc9;Pdcl3                   |
| GO:0006360 | transcription from RNA polymerase I promoter                                               | 2.12E-04 | 6.83E-03 | Process   | 1.49E+01 | Taf1b;Gtf2h1                   |
| GO:1904874 | positive regulation of telomerase RNA localization to Cajal body                           | 6.36E-04 | 6.90E-03 | Process   | 7.44E+00 | Cct6a;Cct4;Cct7                |
| GO:0030890 | positive regulation of B cell proliferation                                                | 1.91E-03 | 6.93E-03 | Process   | 4.14E+00 | Mif;Gpr183;Tnfsf13b;Chrb2;Bmi1 |
| GO:0042113 | B cell activation                                                                          | 1.23E-03 | 7.19E-03 | Process   | 5.13E+00 | Malt1;Hspd1;Chrb2;Ikzf3        |
| GO:0009378 | four-way junction helicase activity                                                        | 2.18E-04 | 7.26E-03 | Function  | 1.44E+01 | Wrn;Blm                        |

|            |                                                            |         |          |          |          |          |                                                                                                                                                                                                                                                      |
|------------|------------------------------------------------------------|---------|----------|----------|----------|----------|------------------------------------------------------------------------------------------------------------------------------------------------------------------------------------------------------------------------------------------------------|
| GO:0000405 | bubble<br>binding                                          | DNA     | 2.18E-04 | 7.26E-03 | Function | 1.44E+01 | Wrn;Blm                                                                                                                                                                                                                                              |
| GO:0034185 | apolipoprotein<br>binding                                  |         | 6.54E-04 | 7.53E-03 | Function | 7.21E+00 | Vldlr;Hspd1;Canx                                                                                                                                                                                                                                     |
| GO:0003700 | DNA<br>transcription factor<br>activity                    | binding | 3.71E-02 | 8.29E-03 | Function | 1.53E+00 | Rbpjl;Myt1;Zfp438;Klf16;Onecut2;Creb1;Fosl1;Pgr;Ctcf;Cited1;Zfp281;2610044O15Rik<br>8;Gm14409;Zfp229;Zfp53;Bsx;Zfp72;Nfe2l2;Rfx6;Thra;Pou6f1;Tada2b;Irf6;Nfyb;Zfp874<br>a;2410141K09Rik;Tal1;Atf4;Creb5;Gbp1;Zfp60;Klf2;EU599041;Zfp780b;Zfp322a;Myc |
| GO:0017124 | SH3<br>binding                                             | domain  | 5.49E-03 | 8.55E-03 | Function | 2.58E+00 | Zfp106;Uvrag;Tom1l1;Gja1;Nckipsd;Cblb;Arhgap27;Khdrbs2;Cit                                                                                                                                                                                           |
| GO:0051371 | muscle<br>actinin binding                                  | alpha-  | 6.98E-04 | 9.08E-03 | Function | 6.76E+00 | Mybpc2;Pdlim2;Pkd2                                                                                                                                                                                                                                   |
| GO:0006606 | protein import into<br>nucleus                             |         | 2.88E-03 | 9.83E-03 | Process  | 3.28E+00 | Nup153;Hspa8;Ipo7;Kpnb1;Kpna4;Ing1                                                                                                                                                                                                                   |
| GO:0030490 | maturation of SSU-<br>rRNA                                 |         | 7.20E-04 | 9.91E-03 | Process  | 6.57E+00 | Tsr3;Nol11;Riok1                                                                                                                                                                                                                                     |
| GO:0031396 | regulation of protein<br>ubiquitination                    |         | 7.20E-04 | 9.91E-03 | Process  | 6.57E+00 | Ubqln1;Hsp90aa1;Rnf139                                                                                                                                                                                                                               |
| GO:0006352 | DNA-templated<br>transcription,<br>initiation              |         | 7.20E-04 | 9.91E-03 | Process  | 6.57E+00 | Myc;Rrn3;Taf9b                                                                                                                                                                                                                                       |
| GO:0071499 | cellular response to<br>laminar fluid shear<br>stress      |         | 2.54E-04 | 1.01E-02 | Process  | 1.24E+01 | Nfe2l2;Klf2                                                                                                                                                                                                                                          |
| GO:0051168 | nuclear export                                             |         | 2.54E-04 | 1.01E-02 | Process  | 1.24E+01 | Malt1;Lsg1                                                                                                                                                                                                                                           |
| GO:0044539 | long-chain<br>acid import                                  | fatty   | 2.54E-04 | 1.01E-02 | Process  | 1.24E+01 | Slc27a2;Acsl3                                                                                                                                                                                                                                        |
| GO:0044806 | G-quadruplex<br>unwinding                                  | DNA     | 2.54E-04 | 1.01E-02 | Process  | 1.24E+01 | Wrn;Blm                                                                                                                                                                                                                                              |
| GO:0006207 | 'de novo' pyrimidine<br>nucleobase<br>biosynthetic process |         | 2.54E-04 | 1.01E-02 | Process  | 1.24E+01 | Cps1;Umps                                                                                                                                                                                                                                            |

|            |                                                 |          |          |           |          |                                                                                                                                                                                    |
|------------|-------------------------------------------------|----------|----------|-----------|----------|------------------------------------------------------------------------------------------------------------------------------------------------------------------------------------|
| GO:0033135 | regulation of peptidyl-serine phosphorylation   | 2.54E-04 | 1.01E-02 | Process   | 1.24E+01 | Nsd1;Sptbn4                                                                                                                                                                        |
| GO:0031514 | motile cilium                                   | 3.71E-03 | 1.04E-02 | Component | 2.91E+00 | Sept4;Intu;Pkd2;Dnah17;Dnah2;Slc9c1;Dync2h1                                                                                                                                        |
| GO:0000403 | Y-form DNA binding                              | 2.62E-04 | 1.07E-02 | Function  | 1.20E+01 | Wrn;Blm                                                                                                                                                                            |
| GO:0017171 | serine hydrolase activity                       | 2.62E-04 | 1.07E-02 | Function  | 1.20E+01 | Pla2g6;Cela2a                                                                                                                                                                      |
| GO:0045505 | dynein intermediate chain binding               | 1.40E-03 | 1.14E-02 | Function  | 4.51E+00 | Dnah17;BC048507;Dync2h1;Dnah2                                                                                                                                                      |
| GO:0003682 | chromatin binding                               | 2.04E-02 | 1.21E-02 | Function  | 1.69E+00 | Rbpjl;Sox14;Ybx1;Rnf2;Ctcf;Cited1;Nup153;Mllt3;Bmi1;Pola1;Tada2b;Lmo2;Hesx1;Cdy1;Prop1;Cbx7;Nsd1;Tal1;Kdm4c;Gtf2h1;Wrn;Ezh1                                                        |
| GO:0008270 | zinc ion binding                                | 2.91E-02 | 1.21E-02 | Function  | 1.57E+00 | Polr3k;Mmp10;Ptch1;Myt1;Churc1;Rnf2;Agbl3;Pgr;Rnf139;Nup153;Top3a;Trim33;Thra;Ikzf5;Trim13;Sf3a3;Zcchc2;Usp33;Zcchc10;Zfp37;Nsd1;Adamts20;Dhh;Neil2;Esco1;Kdm4c;Blm;Zfand5;Chordc1 |
| GO:0035690 | cellular response to drug                       | 2.20E-03 | 1.27E-02 | Process   | 3.58E+00 | Rbm22;Blm;Braf;Nfe2l2;Myc                                                                                                                                                          |
| GO:0051959 | dynein light intermediate chain binding         | 1.44E-03 | 1.27E-02 | Function  | 4.37E+00 | Dnah17;BC048507;Dync2h1;Dnah2                                                                                                                                                      |
| GO:0001502 | cartilage condensation                          | 8.05E-04 | 1.36E-02 | Process   | 5.88E+00 | Otor;Thra;Col11a1                                                                                                                                                                  |
| GO:0004842 | ubiquitin-protein transferase activity          | 1.47E-02 | 1.38E-02 | Function  | 1.81E+00 | Klhdc8a;Rnf139;Ube3a;Ube2w;Malt1;G2e3;Herc6;Trim13;Klhl29;Lmo7;Rnf103;Ube2c;Cblb;Klhl30;Mphosph8;Rnf2;Fbx14                                                                        |
| GO:0043584 | nose development                                | 2.97E-04 | 1.38E-02 | Process   | 1.06E+01 | Hesx1;Rdh10                                                                                                                                                                        |
| GO:0045656 | negative regulation of monocyte differentiation | 2.97E-04 | 1.38E-02 | Process   | 1.06E+01 | Zbtb46;Myc                                                                                                                                                                         |
| GO:0009313 | oligosaccharide catabolic process               | 2.97E-04 | 1.38E-02 | Process   | 1.06E+01 | Gm2a;Ctbs                                                                                                                                                                          |

|            |                                                   |          |          |           |          |                                                   |
|------------|---------------------------------------------------|----------|----------|-----------|----------|---------------------------------------------------|
| GO:0051480 | regulation of cytosolic calcium ion concentration | 1.48E-03 | 1.40E-02 | Process   | 4.25E+00 | Trpc1;Tmem178;Cul5;Cdh23                          |
| GO:0034366 | spherical high-density lipoprotein particle       | 2.98E-04 | 1.46E-02 | Component | 1.03E+01 | Apoc3;Pon1                                        |
| GO:0070765 | gamma-secretase complex                           | 2.98E-04 | 1.46E-02 | Component | 1.03E+01 | Aph1b;Aph1c                                       |
| GO:0000151 | ubiquitin ligase complex                          | 3.96E-03 | 1.46E-02 | Component | 2.72E+00 | Ccnc;Ube2c;4933402N03Rik;Mphosph8;Rnf2;Hspa8;Bmi1 |
| GO:0051880 | G-quadruplex DNA binding                          | 3.05E-04 | 1.47E-02 | Function  | 1.03E+01 | Wrn;Blm                                           |
| GO:0008479 | queuine tRNA-ribosyltransferase activity          | 3.05E-04 | 1.47E-02 | Function  | 1.03E+01 | Txndc9;Pdcl3                                      |
| GO:0005113 | patched binding                                   | 3.05E-04 | 1.47E-02 | Function  | 1.03E+01 | Dhh;Ptch1                                         |
| GO:0015030 | Cajal body                                        | 1.49E-03 | 1.54E-02 | Component | 4.13E+00 | Lsg1;Angel2;Toe1;Npat                             |
| GO:0060997 | dendritic spine morphogenesis                     | 8.47E-04 | 1.56E-02 | Process   | 5.58E+00 | Ctnnd2;Epha5;Prmt3                                |
| GO:0071013 | catalytic step 2 spliceosome                      | 4.13E-03 | 1.81E-02 | Component | 2.61E+00 | Sf3a3;Magohb;Rbm22;Sf3b6;Crnk11;Rbm8a;Ppwd1       |
| GO:0061820 | telomeric D-loop disassembly                      | 3.39E-04 | 1.81E-02 | Process   | 9.31E+00 | Wrn;Blm                                           |
| GO:0002070 | epithelial cell maturation                        | 3.39E-04 | 1.81E-02 | Process   | 9.31E+00 | Pgr;Gjal                                          |
| GO:0034379 | very-low-density lipoprotein particle assembly    | 3.39E-04 | 1.81E-02 | Process   | 9.31E+00 | Apoc3;Acsl3                                       |
| GO:0010518 | positive regulation of phospholipase activity     | 3.39E-04 | 1.81E-02 | Process   | 9.31E+00 | Hpca;Pla2g5                                       |

|            |                                                                      |          |          |           |          |                                                                             |
|------------|----------------------------------------------------------------------|----------|----------|-----------|----------|-----------------------------------------------------------------------------|
| GO:0050847 | progesterone<br>receptor signaling<br>pathway                        | 3.39E-04 | 1.81E-02 | Process   | 9.31E+00 | Ube3a;Pgr                                                                   |
| GO:0048680 | positive regulation<br>of axon<br>regeneration                       | 3.39E-04 | 1.81E-02 | Process   | 9.31E+00 | Braf;Mif                                                                    |
| GO:0034498 | early endosome to<br>Golgi transport                                 | 3.39E-04 | 1.81E-02 | Process   | 9.31E+00 | Snx1;Rbsn                                                                   |
| GO:0071481 | cellular response to<br>X-ray                                        | 3.39E-04 | 1.81E-02 | Process   | 9.31E+00 | Ccnd2;Sfrp1                                                                 |
| GO:0048845 | venous blood vessel<br>morphogenesis                                 | 3.39E-04 | 1.81E-02 | Process   | 9.31E+00 | Notch4;Ccm2                                                                 |
| GO:0030496 | midbody                                                              | 5.11E-03 | 1.84E-02 | Component | 2.41E+00 | Uvrag;Cep55;Ptch1;Aurkb;Lym1;Txndc9;Cit;Sept1                               |
| GO:0007339 | binding of sperm to<br>zona pellucida                                | 1.61E-03 | 1.85E-02 | Process   | 3.92E+00 | Cct6a;Zan;Cct4;Cct7                                                         |
| GO:0008380 | RNA splicing                                                         | 1.06E-02 | 1.87E-02 | Process   | 1.93E+00 | Dcps;Wtap;Ncbp2;Sf3a3;Thoc2;Ybx1;Magohb;Rbm22;Hspa8;Sf3b6;Crnk11;Lsm5;Ppwd1 |
| GO:0072669 | tRNA-splicing<br>ligase complex                                      | 3.41E-04 | 1.91E-02 | Component | 9.04E+00 | Zbtb8os;AI597479                                                            |
| GO:0001164 | RNA polymerase I<br>CORE element<br>sequence-specific<br>DNA binding | 3.49E-04 | 1.92E-02 | Function  | 9.02E+00 | Taf1b;Rrn3                                                                  |
| GO:0043140 | ATP-dependent 3'-<br>5' DNA helicase<br>activity                     | 3.49E-04 | 1.92E-02 | Function  | 9.02E+00 | Wrn;Blm                                                                     |
| GO:0102391 | decanoate--CoA<br>ligase activity                                    | 3.49E-04 | 1.92E-02 | Function  | 9.02E+00 | Slc27a2;Acsl3                                                               |
| GO:0004033 | aldo-keto reductase<br>(NADP) activity                               | 3.49E-04 | 1.92E-02 | Function  | 9.02E+00 | Akr1c20;Akr1c13                                                             |

|            |                                                              |          |          |           |          |                                                                                                                |
|------------|--------------------------------------------------------------|----------|----------|-----------|----------|----------------------------------------------------------------------------------------------------------------|
| GO:0008035 | high-density lipoprotein particle binding                    | 3.49E-04 | 1.92E-02 | Function  | 9.02E+00 | Pon1;Hspd1                                                                                                     |
| GO:0008020 | G-protein coupled photoreceptor activity                     | 3.49E-04 | 1.92E-02 | Function  | 9.02E+00 | Rgr;Opn4                                                                                                       |
| GO:0035145 | exon-exon junction complex                                   | 8.95E-04 | 1.93E-02 | Component | 5.17E+00 | Pym1;Rbm8a;Magohb                                                                                              |
| GO:0008569 | ATP-dependent microtubule motor activity, minus-end-directed | 9.16E-04 | 1.95E-02 | Function  | 5.15E+00 | Dnah17;Dync2h1;Dnah2                                                                                           |
| GO:0043085 | positive regulation of catalytic activity                    | 1.65E-03 | 2.02E-02 | Process   | 3.82E+00 | Aph1b;Aph1c;Myc;Hspa8                                                                                          |
| GO:0061512 | protein localization to cilium                               | 9.32E-04 | 2.03E-02 | Process   | 5.08E+00 | Bbs9;Dync2h1;Tulp4                                                                                             |
| GO:0050821 | protein stabilization                                        | 6.44E-03 | 2.19E-02 | Process   | 2.20E+00 | Creb1;Cct6a;Hsp90aa1;Cct7;Usp33;Cct4;Bag3;Hspd1;Taf9b                                                          |
| GO:0003824 | catalytic activity                                           | 2.04E-02 | 2.22E-02 | Function  | 1.61E+00 | St6gal2;Pklr;Enpp6;Azin1;Ppm1a;Ganc;Npl;Cps1;Ugdh;Cdy1;Ckb;Mut;Slc27a2;Neil2;Cth;Umpps;Acsl3;Auh;Wrm;Blm;Prkg1 |
| GO:0009048 | dosage compensation by inactivation of X chromosome          | 3.81E-04 | 2.29E-02 | Process   | 8.27E+00 | Eif1;Ctcf                                                                                                      |
| GO:0014050 | negative regulation of glutamate secretion                   | 3.81E-04 | 2.29E-02 | Process   | 8.27E+00 | Prkg1;Htr6                                                                                                     |
| GO:0034374 | low-density lipoprotein particle remodeling                  | 3.81E-04 | 2.29E-02 | Process   | 8.27E+00 | Pla2g5;Mpo                                                                                                     |
| GO:0080009 | mRNA methylation                                             | 3.81E-04 | 2.29E-02 | Process   | 8.27E+00 | Mettl3;Wtap                                                                                                    |

|            |                                                                 |          |          |          |          |                                            |
|------------|-----------------------------------------------------------------|----------|----------|----------|----------|--------------------------------------------|
| GO:0042994 | cytoplasmic<br>sequestering of<br>transcription factor          | 3.81E-04 | 2.29E-02 | Process  | 8.27E+00 | Thra;Pkd2                                  |
| GO:0043030 | regulation of<br>macrophage<br>activation                       | 3.81E-04 | 2.29E-02 | Process  | 8.27E+00 | Shpk;Pla2g5                                |
| GO:0030814 | regulation of cAMP<br>metabolic process                         | 3.81E-04 | 2.29E-02 | Process  | 8.27E+00 | Cep290;Pkd2                                |
| GO:0006032 | chitin catabolic<br>process                                     | 3.81E-04 | 2.29E-02 | Process  | 8.27E+00 | Chil6;Ctbs                                 |
| GO:0032926 | negative regulation<br>of activin receptor<br>signaling pathway | 3.81E-04 | 2.29E-02 | Process  | 8.27E+00 | Lemd3;Magi2                                |
| GO:2000234 | positive regulation<br>of rRNA processing                       | 3.81E-04 | 2.29E-02 | Process  | 8.27E+00 | Heatr1;Riok1                               |
| GO:0002329 | pre-B cell<br>differentiation                                   | 3.81E-04 | 2.29E-02 | Process  | 8.27E+00 | Cd24a;Atp11c                               |
| GO:0045494 | photoreceptor cell<br>maintenance                               | 1.74E-03 | 2.38E-02 | Process  | 3.63E+00 | Cep290;Rp1;Lca5;Cdh23                      |
| GO:0004568 | chitinase activity                                              | 3.92E-04 | 2.43E-02 | Function | 8.01E+00 | Chil6;Ctbs                                 |
| GO:0042623 | ATPase activity,<br>coupled                                     | 3.92E-04 | 2.43E-02 | Function | 8.01E+00 | Pex1;Hspa8                                 |
| GO:0000340 | RNA 7-<br>methylguanosine<br>cap binding                        | 3.92E-04 | 2.43E-02 | Function | 8.01E+00 | Dcps;Ncbp2                                 |
| GO:0000398 | mRNA splicing, via<br>spliceosome                               | 4.49E-03 | 2.43E-02 | Process  | 2.46E+00 | Mettl3;Ncbp2;Sf3a3;Pspc1;Sf3b6;Crnk11;Lsm5 |
| GO:0004402 | histone<br>acetyltransferase<br>activity                        | 1.74E-03 | 2.43E-02 | Function | 3.61E+00 | Cdyl;Elp4;Tada2b;Taf9b                     |

|            |                                                        |          |          |           |          |                                                                                                                                                   |
|------------|--------------------------------------------------------|----------|----------|-----------|----------|---------------------------------------------------------------------------------------------------------------------------------------------------|
| GO:0005509 | calcium ion binding                                    | 2.57E-02 | 2.45E-02 | Function  | 1.53E+00 | Vldlr;Canx;Stab1;Pon1;Pkd2;Hpc;Actn2;Fstl5;Slc25a25;Umod;Rptn;Pla2g5;Cblb;Cps1;Padi6;Stab2;Notch4;My11;Anxa10;Dhh;Atp2c1;Syt14;Braf;Chordc1;Cdh23 |
| GO:0008023 | transcription elongation factor complex                | 9.80E-04 | 2.47E-02 | Component | 4.72E+00 | Mllt3;Elp4;Eaf1                                                                                                                                   |
| GO:0008139 | nuclear localization sequence binding                  | 1.00E-03 | 2.49E-02 | Function  | 4.70E+00 | Nup153;Kpnb1;Kpna4                                                                                                                                |
| GO:0007159 | leukocyte cell-cell adhesion                           | 1.02E-03 | 2.57E-02 | Process   | 4.65E+00 | Cd24a;Umod;Vcam1                                                                                                                                  |
| GO:0050856 | regulation of T cell receptor signaling pathway        | 4.24E-04 | 2.81E-02 | Process   | 7.44E+00 | Malt1;Cblb                                                                                                                                        |
| GO:0061337 | cardiac conduction                                     | 4.24E-04 | 2.81E-02 | Process   | 7.44E+00 | Sptbn4;Gja1                                                                                                                                       |
| GO:0046632 | alpha-beta T cell differentiation                      | 4.24E-04 | 2.81E-02 | Process   | 7.44E+00 | Braf;Blm                                                                                                                                          |
| GO:0007220 | Notch receptor processing                              | 4.24E-04 | 2.81E-02 | Process   | 7.44E+00 | Aph1b;Aph1c                                                                                                                                       |
| GO:0031145 | anaphase-promoting complex-dependent catabolic process | 4.24E-04 | 2.81E-02 | Process   | 7.44E+00 | Anapc10;Ube2c                                                                                                                                     |
| GO:0051591 | response to cAMP                                       | 1.06E-03 | 2.86E-02 | Process   | 4.47E+00 | Braf;Pklr;Cited1                                                                                                                                  |
| GO:0031018 | endocrine pancreas development                         | 1.06E-03 | 2.86E-02 | Process   | 4.47E+00 | Rfx6;Onecut2;Myt1                                                                                                                                 |
| GO:0005975 | carbohydrate metabolic process                         | 7.88E-03 | 2.92E-02 | Process   | 2.00E+00 | St6gal2;Ganc;Pklr;Ctbs;Gnpda2;Ppp1r2;Npl;Shpk;Glb112;Pdha2                                                                                        |
| GO:0005041 | low-density lipoprotein receptor activity              | 4.36E-04 | 2.98E-02 | Function  | 7.21E+00 | Stab1;Stab2                                                                                                                                       |
| GO:0009881 | photoreceptor activity                                 | 4.36E-04 | 2.98E-02 | Function  | 7.21E+00 | Rgr;Opn4                                                                                                                                          |



|            |                                                        |          |          |           |          |                                                                                                                                                                                                                                                                                                                               |
|------------|--------------------------------------------------------|----------|----------|-----------|----------|-------------------------------------------------------------------------------------------------------------------------------------------------------------------------------------------------------------------------------------------------------------------------------------------------------------------------------|
| GO:0031519 | PcG protein complex                                    | 1.07E-03 | 3.08E-02 | Component | 4.34E+00 | Bmi1;Rnf2;Cbx7                                                                                                                                                                                                                                                                                                                |
| GO:0015031 | protein transport                                      | 2.51E-02 | 3.09E-02 | Process   | 1.51E+00 | Btf3;Pex1;Tmed5;Lin7c;Tom111;Lsg1;Vps13a;Cep290;Bbs9;Kpnb1;Slc15a4;Appbp2;Snx24;Ap3m2;Snx16;Snx1;Rbsn;Ipo7;Timm9;Lca5;Copg1;Nup37;Vps37a;Kpna4                                                                                                                                                                                |
| GO:0004623 | phospholipase activity                                 | 1.09E-03 | 3.10E-02 | Function  | 4.33E+00 | Pla2g5;Pla2g6;Plb1                                                                                                                                                                                                                                                                                                            |
| GO:0007286 | spermatid development                                  | 3.73E-03 | 3.12E-02 | Process   | 2.54E+00 | Sept4;Strbp;Dhh;Trip13;Cdy1;Pygo1                                                                                                                                                                                                                                                                                             |
| GO:0003723 | RNA binding                                            | 6.28E-02 | 3.14E-02 | Function  | 1.30E+00 | Cct6a;Mettl3;Strbp;Btf3;Pus7;Hspe1;Gspt1;Ybx1;Nol10;Cct4;Rbm22;Crnk11;Canx;Gm5093;Rpl39;Lsm5;Stip1;Ythdf1;Sf3b6;Heatr1;Kpnb1;Hspd1;Safb2;Kctd12;Nol11;Luc712;Sf3a3;Trmo;Thoc2;Dhx33;Brix1;Mrpl32;Eif1ax;Esf1;Krr1;Rps12;Gar1;Pym1;Pspc1;Hspa8;Cbx7;Igf2bp3;Zfp106;Hsp90aa1;Ncbp2;Exosc3;Auh;Magohb;Khdrbs2;Fubp3;Rbm8a;Khdc1b |
| GO:0043231 | intracellular membrane-bounded organelle               | 3.35E-02 | 3.15E-02 | Component | 1.42E+00 | Ptch1;Lamp3;Dennd6a;Ybx1;Ugt2b38;Fmo5;Ppp6r2;Tax1bp3;Fosl1;Pon1;Rdh10;Hspd1;Safb2;Btaf1;Snx16;Snx1;Rbsn;Ugt2a3;Mpo;Eaf1;Slc27a2;Ugt2b34;Gpbp1;Mpv171;Acsl3;Atp2c1;Braf;Vps37a;Cyp2f2;Trappc21;Pdha2                                                                                                                           |
| GO:0051087 | chaperone binding                                      | 3.75E-03 | 3.23E-02 | Function  | 2.52E+00 | Hspe1;Stip1;Ahsa2;Bag3;Hspd1;Timm9                                                                                                                                                                                                                                                                                            |
| GO:0006397 | mRNA processing                                        | 1.39E-02 | 3.34E-02 | Process   | 1.70E+00 | Dcps;Mettl3;Wtap;Ncbp2;Sf3a3;Thoc2;Ybx1;Magohb;Rbm22;Khdrbs2;Hspa8;Sf3b6;Crnk11;Lsm5;Ppwd1                                                                                                                                                                                                                                    |
| GO:0001763 | morphogenesis of a branching structure                 | 4.66E-04 | 3.38E-02 | Process   | 6.77E+00 | Ctnnd2;Notch4                                                                                                                                                                                                                                                                                                                 |
| GO:0046641 | positive regulation of alpha-beta T cell proliferation | 4.66E-04 | 3.38E-02 | Process   | 6.77E+00 | Cd24a;Blm                                                                                                                                                                                                                                                                                                                     |
| GO:0033603 | positive regulation of dopamine secretion              | 4.66E-04 | 3.38E-02 | Process   | 6.77E+00 | Htr6;Chrn2                                                                                                                                                                                                                                                                                                                    |
| GO:0032816 | positive regulation of natural killer cell activation  | 4.66E-04 | 3.38E-02 | Process   | 6.77E+00 | Il12a;Raet1b                                                                                                                                                                                                                                                                                                                  |

|            |                                                                                       |          |          |           |          |                                             |
|------------|---------------------------------------------------------------------------------------|----------|----------|-----------|----------|---------------------------------------------|
| GO:2000009 | negative regulation of protein localization to cell surface                           | 4.66E-04 | 3.38E-02 | Process   | 6.77E+00 | Actn2;Tax1bp3                               |
| GO:0070613 | regulation of protein processing                                                      | 4.66E-04 | 3.38E-02 | Process   | 6.77E+00 | Notch4;Rnf139                               |
| GO:0018298 | protein-chromophore linkage                                                           | 4.66E-04 | 3.38E-02 | Process   | 6.77E+00 | Rgr;Opn4                                    |
| GO:0004553 | hydrolase activity, hydrolyzing O-glycosyl compounds                                  | 1.13E-03 | 3.44E-02 | Function  | 4.16E+00 | Ganc;Glb112;Ctbs                            |
| GO:0070979 | protein K11-linked ubiquitination                                                     | 1.14E-03 | 3.50E-02 | Process   | 4.14E+00 | Anapc10;Ube2w;Ube2c                         |
| GO:0035102 | PRC1 complex                                                                          | 4.69E-04 | 3.56E-02 | Component | 6.58E+00 | Rnf2;Cbx7                                   |
| GO:0017069 | snRNA binding                                                                         | 4.80E-04 | 3.58E-02 | Function  | 6.56E+00 | Toe1;Ncbp2                                  |
| GO:0016772 | transferase activity, transferring phosphorus-containing groups                       | 4.80E-04 | 3.58E-02 | Function  | 6.56E+00 | Ckb;Fpgt                                    |
| GO:0008026 | ATP-dependent helicase activity                                                       | 4.80E-04 | 3.58E-02 | Function  | 6.56E+00 | Wrn;Blm                                     |
| GO:0008061 | chitin binding                                                                        | 4.80E-04 | 3.58E-02 | Function  | 6.56E+00 | Chil6;Ctbs                                  |
| GO:0070410 | co-SMAD binding                                                                       | 4.80E-04 | 3.58E-02 | Function  | 6.56E+00 | Cited1;Trim33                               |
| GO:0001228 | transcriptional activator activity, RNA polymerase II transcription regulatory region | 5.93E-03 | 3.60E-02 | Function  | 2.12E+00 | Rfx6;Rbpjl;Ctcf;Ikzf3;Myt1;Myf6;Lmo2;Zfp131 |

sequence-specific  
DNA binding

|            |                                                                   |          |          |           |          |                                                                                                                                                                                                     |
|------------|-------------------------------------------------------------------|----------|----------|-----------|----------|-----------------------------------------------------------------------------------------------------------------------------------------------------------------------------------------------------|
| GO:0030154 | cell differentiation                                              | 3.61E-02 | 3.69E-02 | Process   | 1.40E+00 | Mettl3;Strbp;Sema4g;Myt1;Morn2;Tff1;Sfrp1;Creb1;Tle3;Cited1;Adam26a;Zfp281;Ift81;Trip13;Adcyap1r1;Rfx6;Sema3a;Sept4;Usp42;Myf6;Irf6;Notch4;Cdy1;Slc9c1;Zfp37;Tal1;Cplx2;Prkx;Zfp521;Cit;Braf;Txndc2 |
| GO:0045429 | positive regulation of nitric oxide biosynthetic process          | 1.99E-03 | 3.71E-02 | Process   | 3.17E+00 | Raet1b;Klf2;Hsp90aa1;Pkd2                                                                                                                                                                           |
| GO:0036126 | sperm flagellum                                                   | 1.96E-03 | 3.78E-02 | Component | 3.15E+00 | Sept4;Tek5;Hsp90aa1;Txndc2                                                                                                                                                                          |
| GO:0050840 | extracellular matrix binding                                      | 1.18E-03 | 3.79E-02 | Function  | 4.01E+00 | Olfml2a;Bgn;Zan                                                                                                                                                                                     |
| GO:0007283 | spermatogenesis                                                   | 1.67E-02 | 3.86E-02 | Process   | 1.61E+00 | Mif;Tle3;Mettl3;Strbp;Sept4;Adam26a;Usp42;Morn2;Zfx;Ift81;Slc9c1;Cit;Trip13;Cdy1;Txndc2;Zfp37;Adcyap1r1                                                                                             |
| GO:0000978 | RNA polymerase II proximal promoter sequence-specific DNA binding | 1.92E-02 | 3.90E-02 | Function  | 1.56E+00 | Creb1;Rfx6;Nsd1;Fosl1;Rbpjl;Pgr;Tal1;Atf4;Ctcf;Zfp281;Fubp3;Ybx1;Myf6;Bsx;Hesx1;Klf16;Onecut2;Myc;Bmi1                                                                                              |
| GO:0002237 | response to molecule of bacterial origin                          | 5.08E-04 | 3.98E-02 | Process   | 6.20E+00 | Malt1;Cd24a                                                                                                                                                                                         |
| GO:0045577 | regulation of B cell differentiation                              | 5.08E-04 | 3.98E-02 | Process   | 6.20E+00 | Cd24a;Ikzf3                                                                                                                                                                                         |
| GO:0046548 | retinal rod cell development                                      | 5.08E-04 | 3.98E-02 | Process   | 6.20E+00 | Rp1;Miat                                                                                                                                                                                            |
| GO:0060644 | mammary gland epithelial cell differentiation                     | 5.08E-04 | 3.98E-02 | Process   | 6.20E+00 | Irf6;Ptch1                                                                                                                                                                                          |

|            |                                                                     |          |          |           |          |                                                                                                                                                                                                                                                                                                                                                                               |
|------------|---------------------------------------------------------------------|----------|----------|-----------|----------|-------------------------------------------------------------------------------------------------------------------------------------------------------------------------------------------------------------------------------------------------------------------------------------------------------------------------------------------------------------------------------|
| GO:0035970 | peptidyl-threonine<br>dephosphorylation                             | 5.08E-04 | 3.98E-02 | Process   | 6.20E+00 | Dusp5;Ppm1a                                                                                                                                                                                                                                                                                                                                                                   |
| GO:0044237 | cellular metabolic<br>process                                       | 5.08E-04 | 3.98E-02 | Process   | 6.20E+00 | Wrn;Blm                                                                                                                                                                                                                                                                                                                                                                       |
| GO:0021952 | central nervous<br>system projection<br>neuron<br>axonogenesis      | 5.08E-04 | 3.98E-02 | Process   | 6.20E+00 | Sptbn4;Chrn2                                                                                                                                                                                                                                                                                                                                                                  |
| GO:0043235 | receptor complex                                                    | 5.96E-03 | 4.10E-02 | Component | 2.07E+00 | Pigr;Lepr;Kctd12;Vldlr;Impg2;Plxdc1;Trpc1;Adcyap1r1                                                                                                                                                                                                                                                                                                                           |
| GO:0005719 | nuclear euchromatin                                                 | 1.19E-03 | 4.13E-02 | Component | 3.88E+00 | Creb1;Myc;Cecr2                                                                                                                                                                                                                                                                                                                                                               |
| GO:0001824 | blastocyst<br>development                                           | 1.23E-03 | 4.20E-02 | Process   | 3.85E+00 | N4bp2l2;Thoc2;G2e3                                                                                                                                                                                                                                                                                                                                                            |
| GO:0017017 | MAP kinase<br>tyrosine/serine/thre<br>onine phosphatase<br>activity | 5.23E-04 | 4.21E-02 | Function  | 6.01E+00 | Dusp5;Dusp1                                                                                                                                                                                                                                                                                                                                                                   |
| GO:0042752 | regulation of<br>circadian rhythm                                   | 2.08E-03 | 4.22E-02 | Process   | 3.04E+00 | Creb1;Ube3a;Opn4;Pspc1                                                                                                                                                                                                                                                                                                                                                        |
| GO:0005681 | spliceosomal<br>complex                                             | 6.05E-03 | 4.39E-02 | Component | 2.04E+00 | Rheb;Sf3a3;Rbm22;Hspa8;Sf3b6;Crnk11;Lsm5;Ppwd1                                                                                                                                                                                                                                                                                                                                |
| GO:0046982 | protein<br>heterodimerization<br>activity                           | 2.47E-02 | 4.48E-02 | Function  | 1.47E+00 | Mettl3;Gtf2a1;Myc;Sox14;Ralgapa2;Uba3;Ii12a;Taf9b;Nfe2l2;Hspd1;Thra;Pola1;Snx1;Nf<br>yb;Tal1;Atf4;Ikzf3;Syt14;Khdrbs2;Braf;Cul5;Lsm5;Chrn2                                                                                                                                                                                                                                    |
| GO:0003677 | DNA binding                                                         | 7.56E-02 | 4.49E-02 | Function  | 1.25E+00 | Gtf2a1;Strbp;Rbpjl;Dlx6;Mcm8;Sox14;Zfp518a;Ybx1;Churc1;Myt1;Acid;Zfp329;Zfx;Klf1<br>6;Onecut2;Sp100;Creb1;Fosl1;Pgr;Ctcf;Adnp2;Rev1;Zfp281;Taf1b;Rfxap;Top3a;Bsx;Zfp<br>131;Nfe2l2;Trim33;Rfx6;Thra;Ikzf5;Safb2;Pola1;Pou6f1;Myf6;Lmo2;Irf6;Hesx1;Zfp37;P<br>rop1;Lemd3;Nfyb;Neil2;Tal1;Atf4;Ikzf3;Creb5;Zfp60;Klf2;Gbbp1;Zfp521;Zfp322a;Polr1<br>d;Blm;Wrn;Zfp654;Zfand5;Myc |
| GO:0016604 | nuclear body                                                        | 1.18E-02 | 4.53E-02 | Component | 1.70E+00 | Safb2;Toe1;Pou6f1;Lsg1;Eaf1;Acid;Rnf2;Miat;Cdy1;Med19;Myc;Ppwd1;Bmi1                                                                                                                                                                                                                                                                                                          |

|            |                                                |          |          |           |          |                                                                                                                                    |
|------------|------------------------------------------------|----------|----------|-----------|----------|------------------------------------------------------------------------------------------------------------------------------------|
| GO:0045503 | dynein light chain binding                     | 1.26E-03 | 4.55E-02 | Function  | 3.73E+00 | Dnah17;Dync2h1;Dnah2                                                                                                               |
| GO:0015020 | glucuronosyltransferase activity               | 1.26E-03 | 4.55E-02 | Function  | 3.73E+00 | Ugt2b34;Ugt2a3;Ugt2b38                                                                                                             |
| GO:0006828 | manganese ion transport                        | 5.51E-04 | 4.62E-02 | Process   | 5.73E+00 | Atp2c1;Trpc1                                                                                                                       |
| GO:0043268 | positive regulation of potassium ion transport | 5.51E-04 | 4.62E-02 | Process   | 5.73E+00 | Mif;Actn2                                                                                                                          |
| GO:0043616 | keratinocyte proliferation                     | 5.51E-04 | 4.62E-02 | Process   | 5.73E+00 | Irf6;Ptch1                                                                                                                         |
| GO:0042438 | melanin biosynthetic process                   | 5.51E-04 | 4.62E-02 | Process   | 5.73E+00 | Cited1;Trpc1                                                                                                                       |
| GO:0016574 | histone ubiquitination                         | 5.51E-04 | 4.62E-02 | Process   | 5.73E+00 | Rnf2;Bmi1                                                                                                                          |
| GO:0021795 | cerebral cortex cell migration                 | 5.51E-04 | 4.62E-02 | Process   | 5.73E+00 | Htr6;Cx3cr1                                                                                                                        |
| GO:0043508 | negative regulation of JUN kinase activity     | 5.51E-04 | 4.62E-02 | Process   | 5.73E+00 | Dusp19;Sfrp1                                                                                                                       |
| GO:0045580 | regulation of T cell differentiation           | 5.51E-04 | 4.62E-02 | Process   | 5.73E+00 | Braf;Mettl3                                                                                                                        |
| GO:0030514 | negative regulation of BMP signaling pathway   | 2.16E-03 | 4.78E-02 | Process   | 2.92E+00 | Lemd3;Ppm1a;Sfrp1;Trim33                                                                                                           |
| GO:0007155 | cell adhesion                                  | 2.23E-02 | 4.82E-02 | Process   | 1.48E+00 | Siglecg;Tm9sf4;Tnfaip6;Pcdh17;Vcam1;Ninj2;Emb;Stab1;Sdk1;Cx3cr1;Pcdhb12;Parvb;Mybpc2;Hapln4;Stab2;Ctnnd2;Zan;Cd24a;Cd96;Prkx;Cdh23 |
| GO:1990124 | messenger ribonucleoprotein complex            | 5.54E-04 | 4.87E-02 | Component | 5.56E+00 | Ybx1;Hspa8                                                                                                                         |

|            |                                                 |          |          |           |          |                                                                                                                                                                                                                                                                                                                                                                             |
|------------|-------------------------------------------------|----------|----------|-----------|----------|-----------------------------------------------------------------------------------------------------------------------------------------------------------------------------------------------------------------------------------------------------------------------------------------------------------------------------------------------------------------------------|
| GO:0071782 | endoplasmic<br>reticulum tubular<br>network     | 5.54E-04 | 4.87E-02 | Component | 5.56E+00 | Kpnb1;Reep5                                                                                                                                                                                                                                                                                                                                                                 |
| GO:0005641 | nuclear envelope<br>lumen                       | 5.54E-04 | 4.87E-02 | Component | 5.56E+00 | Cacybp;Hrasls                                                                                                                                                                                                                                                                                                                                                               |
| GO:0042805 | actinin binding                                 | 5.67E-04 | 4.89E-02 | Function  | 5.55E+00 | Pkd2;Lmo7                                                                                                                                                                                                                                                                                                                                                                   |
| GO:0004467 | long-chain fatty<br>acid-CoA ligase<br>activity | 5.67E-04 | 4.89E-02 | Function  | 5.55E+00 | Slc27a2;Acsl3                                                                                                                                                                                                                                                                                                                                                               |
| GO:0048156 | tau protein binding                             | 5.67E-04 | 4.89E-02 | Function  | 5.55E+00 | Dyrk1a;Hsp90aa1                                                                                                                                                                                                                                                                                                                                                             |
| GO:0005654 | nucleoplasm                                     | 7.74E-02 | 4.94E-02 | Component | 1.23E+00 | Gtf2a1;Toe1;Ccnd2;Myt1;Rbak;Zfx;Cct4;Rnf2;Ctr9;Zfp438;Onecut2;Creb1;Tle3;Fosl1;Ctcf;Aprt;Zfp281;Npat;Brd8;Zfp131;Nfe2l2;Kpnb1;Mif;Sept4;Safb2;Btaf1;Pola1;Cacybp;Sf3a3;Lyrm1;Elp4;Dhx33;Usp33;Cblb;Arhgap27;Pspc1;Ipo7;Ugdh;Cdy1;Myo16;Eaf1;Dcps;Dennd2d;Cbx7;Ankrd12;Wtap;Ezh1;Aurkb;Ncbp2;Ikzf3;Exosc3;Ubqln1;Nup37;Dgki;Ppp1r2;Itgb3bp;Gtf2h1;Wrn;Prkg1;Vps37a;Myc;Kpna4 |
| GO:0001701 | in utero embryonic<br>development               | 1.22E-02 | 4.96E-02 | Process   | 1.67E+00 | Amot;Fosl1;Btf3;Ptch1;Gja1;Klf2;N4bp2l2;Ybx1;Rdh10;Ccm2;Zfand5;Rrn3;Bmi1                                                                                                                                                                                                                                                                                                    |
| GO:0006950 | response to stress                              | 1.31E-03 | 4.97E-02 | Process   | 3.60E+00 | Ahsa2;Hsp90aa1;Alk                                                                                                                                                                                                                                                                                                                                                          |

**Table S4. Differentially expressed protein in S-EV-treated HUVECs.**

| GeneSymbol | GeneName | Description                                                    | RefSeq<br>Accession | EnsemblID           | Fold<br>(IH SEV<br>vs.N SEV) | Regulation<br>(IH SEV<br>vs.N SEV) | p<br>value | IH<br>SEV1 | IH<br>SEV2 | IH<br>SEV3 | Nor<br>SEV1 | Nor<br>SEV2 | Nor<br>SEV3 |
|------------|----------|----------------------------------------------------------------|---------------------|---------------------|------------------------------|------------------------------------|------------|------------|------------|------------|-------------|-------------|-------------|
|            |          | heterogeneous nuclear<br>ribonucleoprotein A3<br>pseudogene 12 |                     | ENST00000<br>437410 | -2.078                       | down                               | 0.006      | 6.935      | 7.045      | 6.979      | 8.286       | 7.649       | 8.190       |

|             |                                                 |                                                          |              |                 |        |      |       |       |        |        |        |        |        |
|-------------|-------------------------------------------------|----------------------------------------------------------|--------------|-----------------|--------|------|-------|-------|--------|--------|--------|--------|--------|
| TMEM33      | transmembrane protein 33                        | Homo sapiens transmembrane protein 33                    | NM_018126    | ENST00000325094 | -2.040 | down | 0.046 | 5.624 | 5.691  | 5.914  | 7.129  | 6.072  | 7.113  |
| ARHGEF35    | Rho guanine nucleotide exchange factor (GEF) 35 | Homo sapiens Rho guanine nucleotide exchange factor      | NM_001003702 | ENST00000378115 | -2.087 | down | 0.030 | 7.238 | 7.491  | 7.266  | 8.636  | 7.774  | 8.769  |
| UBXN8       | UBX domain protein 8                            | Homo sapiens UBX domain protein 8                        | NM_001282199 | ENST00000518059 | 2.216  | up   | 0.000 | 8.555 | 8.526  | 8.677  | 7.426  | 7.442  | 7.445  |
| TAOK2       | TAO kinase 2                                    | Homo sapiens TAO kinase 2                                | NM_004783    | ENST00000279394 | 2.037  | up   | 0.001 | 6.516 | 6.450  | 6.470  | 5.574  | 5.551  | 5.231  |
| RAB13       | RAB13, member RAS oncogene family               | Homo sapiens RAB13, member RAS oncogene family           | NM_002870    | ENST00000484297 | -2.082 | down | 0.002 | 9.962 | 10.108 | 10.117 | 11.236 | 10.827 | 11.299 |
| lnc-ZNF91-2 | lnc-ZNF91-2:1                                   | heterogeneous nuclear ribonucleoprotein A1 pseudogene 36 |              | ENST00000521313 | -2.003 | down | 0.006 | 9.088 | 9.318  | 9.079  | 10.233 | 9.841  | 10.417 |
| DCAF8       | DDB1 and CUL4 associated factor 8               | LNCipedia lincRNA                                        |              |                 | -3.249 | down | 0.024 | 6.180 | 6.255  | 6.089  | 8.334  | 6.924  | 8.366  |
|             |                                                 | Homo sapiens DDB1 and CUL4 associated factor 8           | NM_015726    | ENST00000407642 | -2.232 | down | 0.000 | 6.682 | 6.858  | 6.771  | 8.001  | 7.839  | 7.947  |
|             |                                                 | heterogeneous nuclear ribonucleoprotein A1 pseudogene 60 |              | ENST00000526810 | -2.120 | down | 0.011 | 7.280 | 7.483  | 7.196  | 8.526  | 7.964  | 8.722  |
| CCDC71      | coiled-coil domain containing 71                | Homo sapiens coiled-coil domain containing 71            | NM_022903    | ENST00000321895 | 2.161  | up   | 0.001 | 8.941 | 8.613  | 8.624  | 7.644  | 7.708  | 7.492  |

|            |                                             |                                                                     |              |                 |        |      |       |        |        |        |        |        |        |
|------------|---------------------------------------------|---------------------------------------------------------------------|--------------|-----------------|--------|------|-------|--------|--------|--------|--------|--------|--------|
| AKAP12     | A kinase (PRKA) anchor protein 12           | Homo sapiens A kinase (PRKA) anchor protein 12                      | NM_144497    | ENST00000490177 | -2.277 | down | 0.000 | 12.374 | 12.448 | 12.517 | 13.742 | 13.460 | 13.698 |
| lnc-NKD2-3 | lnc-NKD2-3:7 cyclin-dependent kinase 11A    | LNCipedia lincRNA Homo sapiens cyclin-dependent kinase 11A (CDK11A) |              |                 | -3.736 | down | 0.003 | 3.599  | 4.429  | 4.027  | 6.007  | 5.594  | 6.158  |
| CDK11A     | NADH dehydrogenase, subunit 6 (complex I)   | mitochondrially encoded NADH dehydrogenase 6                        | NM_033529    | ENST00000401096 | -2.027 | down | 0.001 | 9.155  | 9.337  | 9.341  | 10.422 | 10.076 | 10.392 |
| ND6        | paternally expressed 10                     | Homo sapiens paternally expressed 10                                | NM_001040152 | ENST00000493935 | -3.521 | down | 0.000 | 8.683  | 8.889  | 8.619  | 10.691 | 10.234 | 10.714 |
| DNAJC7     | DnaJ (Hsp40) homolog, subfamily C, member 7 | Homo sapiens DnaJ (Hsp40) homolog, subfamily C, member 7            | NM_003315    | ENST00000316603 | 2.197  | up   | 0.001 | 11.865 | 11.534 | 11.739 | 10.505 | 10.711 | 10.515 |
| HIST1H2BE  | histone cluster 1, H2be                     | Homo sapiens histone cluster 1, H2be                                | NM_003523    |                 | -2.443 | down | 0.005 | 6.026  | 6.544  | 6.457  | 7.607  | 7.362  | 7.924  |
| NFE2L2     | nuclear factor, erythroid 2-like 2          | Homo sapiens nuclear factor, erythroid 2-like 2                     | NM_006164    | ENST00000464747 | -2.373 | down | 0.004 | 2.788  | 2.966  | 2.630  | 3.373  | 3.305  | 4.304  |

**Table S5. Blood metabolic indexes of participants with or without OSA.**

|                               | Non-OSA<br>(n=6) | OSA<br>(n=6) | P value |
|-------------------------------|------------------|--------------|---------|
| Age (years)                   | 44.8±13.6        | 45.2±14.7    | 0.94    |
| Gender (male, %)              | 100              | 100          | -       |
| Obstructive AHI (events/hour) | 4.1±0.9          | 39.4±22.7    | 0.02    |



|                                 |            |           |      |
|---------------------------------|------------|-----------|------|
| SaO <sub>2</sub> (%)            | 91.1±1.6   | 80.8±3.9  |      |
| Systolic blood pressure (mmHg)  | 11.4±8.38  | 125±11.3  | 0.25 |
| Diastolic blood pressure (mmHg) | 80.8±6.6   | 76.8±8.2  | 0.52 |
| Total cholesterol (mmol/L)      | 4.3±0.5    | 5.1±0.6   | 0.06 |
| HDL cholesterol (mmol/L)        | 1.4±0.2    | 1.3±0.2   | 0.24 |
| LDL cholesterol (mmol/L)        | 2.6±0.8    | 3.6±0.2   | 0.09 |
| Triglycerides (mmol/L)          | 1.0±0.2    | 1.2±0.4   | 0.51 |
| Blood glucose (mmol/L)          | 5.3±0.5    | 5.0±0.9   | 0.39 |
| Body mass index (BMI)           | 23±2.0     | 24.8±4.2  | 0.33 |
| CRP                             | 0.928±0.66 | 1.58±1.52 | 0.39 |

**Table S6. mRNA and pri-mRNA primer sequence.**

|                     |                |                        |
|---------------------|----------------|------------------------|
| Nox2                | Forward primer | AACCCTCCTATGACTTGGAATG |
|                     | Reverse primer | TTGGATACCTTGGGGCACTT   |
| p47 <sup>phox</sup> | Forward primer | TGGTGGGTGGTCAGGAAAGG   |
|                     | Reverse primer | AGGAATCGGACGCTGTTGC    |
| Nox4                | Forward primer | GTGTCTGCATGGTGGTGGTATT |
|                     | Reverse primer | CAGCCAGGAGGGTGAGTGTC   |
| Xdh                 | Forward primer | CACAGAACACCATGAAAACCCA |
|                     | Reverse primer | GAAGCCCACCTTGTATTTAGCC |
| β-actin             | Forward primer | GCATTGTTACCAACTGGGACG  |
|                     | Reverse primer | CAGAGGCATACAGGGACAGCA  |
| Pri-miR-144         | Forward primer | GACCCTGAGCCAATCCCC     |
|                     | Reverse primer | CGGTTTCCTCGCCATTCC     |
| Pri-miR-27a         | Forward primer | GATAGGCAGGCAAGCAAGAAT  |
|                     | Reverse primer | AGCACAGGGTCAGTTGGAAT   |

## Reference

1. Zhang HN, Liu J, Qu D, Wang L, Wong CM, Lau CW *et al.* Serum exosomes mediate delivery of arginase 1 as a novel mechanism for endothelial dysfunction in diabetes. *P Natl Acad Sci USA.* 2018;115:E6927-E6936.
2. Peng L, Li Y, Li X, Du Y, Li L, Hu C *et al.* Extracellular vesicles derived from intermittent hypoxia-treated red blood cells impair endothelial function through regulating enos phosphorylation and et-1 expression. *Cardiovasc Drugs Ther.* 2020.
